# Supplementary material for: A systematic review of economic evaluations of seasonal influenza vaccination for the elderly population in the European Union
Source: PubMed Central journal article supplement — BMJ Open. 2017 Jun 10;7(6):e014847. doi: 10.1136/bmjopen-2016-014847 (PMC5623429; doi:10.1136/bmjopen-2016-014847), 2017-06-10
Supplement: bmjopen-2016-014847.draft_revisions.pdf [file bmjopen-2016-014847.draft_revisions.pdf]

# BMJ Open

## A systematic review of economic evaluations of seasonal influenza vaccination for the elderly population in the European Union

|                                 |                                                                                                                                                                                                                        |
|---------------------------------|------------------------------------------------------------------------------------------------------------------------------------------------------------------------------------------------------------------------|
| Journal:                        | <i>BMJ Open</i>                                                                                                                                                                                                        |
| Manuscript ID                   | bmjopen-2016-014847                                                                                                                                                                                                    |
| Article Type:                   | Research                                                                                                                                                                                                               |
| Date Submitted by the Author:   | 20-Oct-2016                                                                                                                                                                                                            |
| Complete List of Authors:       | Shields, Gemma; University of Manchester, Centre for Health Economics<br>Elvidge, Jamie; University of Manchester, Centre for Health Economics<br>Davies, Linda; University of Manchester, Centre for Health Economics |
| <b>Primary Subject Heading</b>: | Health economics                                                                                                                                                                                                       |
| Secondary Subject Heading:      | Immunology (including allergy), Health policy, Geriatric medicine, Infectious diseases, Public health                                                                                                                  |
| Keywords:                       | HEALTH ECONOMICS, GERIATRIC MEDICINE, Health policy < HEALTH SERVICES ADMINISTRATION & MANAGEMENT, Public health < INFECTIOUS DISEASES                                                                                 |
|                                 |                                                                                                                                                                                                                        |

SCHOLARONE™  
Manuscripts

1  
2  
3 **A systematic review of economic evaluations of seasonal influenza**  
4 **vaccination for the elderly population in the European Union**  
5  
6

7 Gemma E Shields, Jamie Elvidge, Linda M Davies  
8  
9

10 Centre for Health Economics, University of Manchester, Manchester, M13 9PL  
11

12 Gemma E Shields

13 Research Fellow  
14  
15

16 Centre for Health Economics, University of Manchester, Manchester, M13 9PL  
17

18 Jamie Elvidge

19 Research Associate  
20  
21

22 Centre for Health Economics, University of Manchester, Manchester, M13 9PL  
23

24 Professor of Health Economics

25 Linda M Davies  
26  
27

28 **Correspondence to:** [gemma.shields@manchester.ac.uk](mailto:gemma.shields@manchester.ac.uk)  
29  
30  
31  
32  
33  
34  
35  
36  
37  
38  
39  
40  
41  
42  
43  
44  
45  
46  
47  
48  
49  
50  
51  
52  
53  
54  
55  
56  
57  
58  
59  
60

## Abstract

**Objectives:** The Council of the European Union (EU) has recommended that action should be taken to increase influenza vaccination in the elderly population. The objective of the study was to systematically review economic evaluations for influenza vaccination in the elderly population in the EU.

**Methods:** Electronic searches of the NHS Economic Evaluation, Health Technology Assessment, MEDLINE and Embase databases were run to identify full economic evaluations. Two levels of screening were used, with explicit inclusion criteria applied by two independent reviewers at each stage. Pre-specified data extraction and critical appraisal were performed on identified studies. Results were summarised qualitatively.

**Results:** Of the 326 search results, screening identified 8 relevant studies. Results varied widely, with the incremental cost-effectiveness ratio ranging from dominating (both more effective and cheaper than) no intervention to €459,350 per life-year gained. Cost-effectiveness was most sensitive to variations in influenza strain, vaccination type and strategy, population and modelling characteristics.

**Conclusions:** The majority of the evidence concludes that vaccination is cost-effective. However, it is difficult to form a strong overall conclusion due to the uncertainty present in the evidence base and the limited sensitivity analysis conducted in studies to explore this. In the future, economic evaluations conducted alongside randomised clinical trials may be particularly useful to fill in many of the data gaps. More advanced modelling techniques (e.g. patient-level simulation) have the potential to characterise the epidemiology of influenza more accurately.

### Strengths and limitations of this study

- This study systematically reviewed economic evaluations for influenza vaccination in the elderly population in the EU, a practice that is recommended in policy.
- To the authors' knowledge, this search brings the only previous systematic review of economic evidence for influenza vaccination up to date.
- The study summarises and critically appraises the current evidence base and also discusses potential avenues for future research.
- The review was limited to English-language studies, there is scope to broaden the search to include other languages and identify further papers.

## Manuscript

### Introduction

Influenza is a highly contagious acute viral infection, with a risk of complications and mortality. It is a serious public health concern, [1–3].

The prevalence of influenza varies each season and is affected by multiple factors (e.g. virus strength and climate). Approximately 10% of the European population have influenza each year, [4].

Symptoms (fever, coughs and headaches) are usually resolved within 2 weeks. Some high-risk groups have an increased risk of complications, such as pneumonia, and can result in hospitalisation, and death, [1,5]. Over 110 million adults in the European Union (EU) are estimated to belong to high-risk groups such as pregnant women and the elderly, [6].

In the elderly population with influenza-like-illness (ILI), hospitalisation risk has been reported to be up to 8.8%, with up to 4.2% admitted cases requiring time in an intensive care unit and a risk of death when admitted to hospital of 3.1% to 13.5%, [5]. Whilst complication rates are lower in the elderly population when compared to other high-risk groups, older people are more likely to fall into multiple high-risk groups, due to the presence of chronic conditions (e.g. heart failure, Parkinson's disease and asthma) [7,8]. In reality the burden may be higher as influenza contributes to more severe illnesses and may therefore be a causal factor of mortality risk despite not being the primary recorded cause of death, [9]. This is partly due to uncommon laboratory testing for the presence of influenza infection is uncommon and as such it is not recorded, [10]. In addition, influenza exacerbates existing chronic conditions (e.g. respiratory conditions) and causes secondary infections (such as pneumonia) that are more frequently recorded as the cause of death, [10]. Statistical modelling suggests that influenza may actually be responsible for between 2.5%-8.1% of deaths in the over 75 age group, [10].

Seasonal influenza is important to policy makers because it has a large economic impact, both in terms of costs and population quality of life, [11]. Vaccines are the most commonly used intervention to prevent influenza; they work by simulating infection, provoking the body to create antibodies to protect against infection, [12]. The Council of the EU recommended that by 2014-15 75% of the elderly population should be vaccinated against influenza, [13]. The latest published (2012) figures show that the EU mean vaccination coverage is around 44.7% (range: 1% to 77.4%) of the elderly population, substantially short of the EU target, [14]. Social determinants of seasonal influenza vaccination include gender, marital status, ethnicity, education and housing, [15]. Beliefs also played a role, with previous vaccination experiences, perceived susceptibility and perceived effectiveness of the vaccination impacting whether the population aged 65 and over would receive vaccination, [15]. In patients aged 65 and over strategies were found to be successful in increasing vaccination rates;

1  
2  
3 including having a lead staff member to identify eligible patients and sending personal invitations to  
4 patients, [16]  
5

6  
7 In the elderly population the primary goal of vaccination is to reduce the risk of complications  
8 resulting from influenza, although evidence of effectiveness is limited and uncertain in this  
9 population, [12]. In the adult population aged 18-65 influenza efficacy (relative reduction in  
10 influenza risk following vaccination) has been reported to have an efficacy rate of 59% [95% CI 51-  
11 67] in a pooled analysis of 12 seasons, [17]. As people age the immune system can become  
12 compromised and less responsive to vaccination, [18]. When focusing specifically on the elderly  
13 population effectiveness appears to be much lower; with an estimate of 23% efficacy in seasons  
14 where vaccine matching is good, [19]. In addition, when comparing effectiveness evidence across  
15 populations, evidence in the elderly population is much more reliant on low-quality (e.g. non-  
16 randomised cohort studies with small samples) [17,19].  
17  
18  
19  
20  
21

22 In light of the recommendations for influenza vaccination in the elderly population, in an environment  
23 with an aging population and the issues discussed above around vaccination effectiveness, relevant  
24 economic evaluations are likely to be of interest to policy makers. This study aimed to determine  
25 whether influenza vaccination has been demonstrated to be cost-effective, compared to no vaccination  
26 and/or alternative interventions, in the elderly population in EU. It also reviewed the strength of the  
27 evidence base, to inform policy makers and future research.  
28  
29  
30

## 31 32 **Methods** 33

34 A systematic literature search was conducted to identify economic evaluations looking at influenza  
35 vaccinations in the elderly population in the EU.  
36  
37

### 38 *Search Strategy* 39

40 Search terms across the databases used included disease-specific terms, e.g. “influenza”; terms for the  
41 intervention, e.g. “vaccination” and terms for economic evaluations, e.g. “cost-effectiveness”. Search  
42 terms and strategies varied slightly according to the database design and functionality. Free-text and  
43 standardised subject terms were used. Alternative spellings were included to capture all potentially  
44 relevant citations. The search strategy was piloted to ensure it identified all known studies and all  
45 studies identified in a previous review. An example search strategy is provided in the supplementary  
46 material.  
47  
48  
49  
50

51 An initial search was carried out in November 2014. This search used the NHS Economic Evaluation  
52 Database (EED) and the Health Technology Assessment (HTA) database via The Cochrane Library.  
53 At the time of initial search the EED database was a reliable source for economic evaluations, using a  
54  
55  
56

1  
2  
3 very precise search over a wide number of databases to capture relevant studies which helps to reduce  
4 the number of irrelevant study results, [20]. NHS EED ceased being updated in March 2015 and  
5 subsequently in November 2015 searches were updated, with MEDLINE, EMBASE and Econlit  
6 databases searched to identify relevant economic evaluations published after this period. Published  
7 NHS EED search terms were used to identify economic evaluations [21].  
8  
9

### 10 11 *Selection*

12  
13 Identified citations were manually screened against explicit pre-defined inclusion criteria to assess  
14 their relevance to the review. To be eligible for inclusion the study sample or modelled population  
15 had to be based in the European Union and aged  $\geq 60$  or  $\geq 65$  years (the definition of elderly used in  
16 influenza policies across Europe). The intervention was the seasonal influenza vaccination and  
17 comparators could be any alternative intervention intended to reduce the burden of illness associated  
18 with influenza (e.g. antiviral treatments) or usual care/no intervention. Studies had to be full economic  
19 evaluations; producing an incremental cost-effectiveness ratio using a health outcome. No restriction  
20 was placed on publication date. The review was limited to English language articles. Two stages of  
21 screening were used, with the same criteria applied for primary screening of abstracts and titles, and  
22 secondary screening of full papers.  
23  
24  
25  
26  
27

28  
29 Two reviewers carried out each stage of screening independently and checked results, with a third  
30 reviewer consulted to resolve any disagreements. During screening the primary reason for study  
31 exclusion was recorded at each stage.  
32  
33

### 34 *Data Extraction*

35  
36 Specific data, including information on modelling techniques, parameters and outcomes, were  
37 extracted (using pre-defined data extraction tools) from the final evidence base to inform the review.  
38 Comprehensive data extraction was undertaken, in line with the NHS EED handbook and with some  
39 key additions on modelling technique from a review of economic evaluations of vaccinations, [22,23].  
40 The data extraction form used is provided in the supplementary material. This included extracting  
41 information on study methodology, limitations, evidence gaps, results and a quality assessment for  
42 critical appraisal. Two reviewers extracted data independently, results were compared and discussion,  
43 with any disagreements settled by a third reviewer.  
44  
45  
46  
47  
48

49 Cost figures were extracted, then converted into 2014 Euros for presentation using the price index for  
50 each country and the purchasing power parity conversion factor, [24,25].  
51  
52  
53  
54  
55  
56  
57  
58  
59  
60

### Data Synthesis

Extracted data were summarised in text and tables. Study characteristics, cost and outcome data were tabulated and summarised. Critical appraisal was qualitatively synthesised with the help of the checklist.

## RESULTS

### Summary of studies

The search identified 326 results through databases, 35 full-text articles were reviewed, from which eight studies were included in the review (Fig. 1).

Figure 1: flow diagram of search

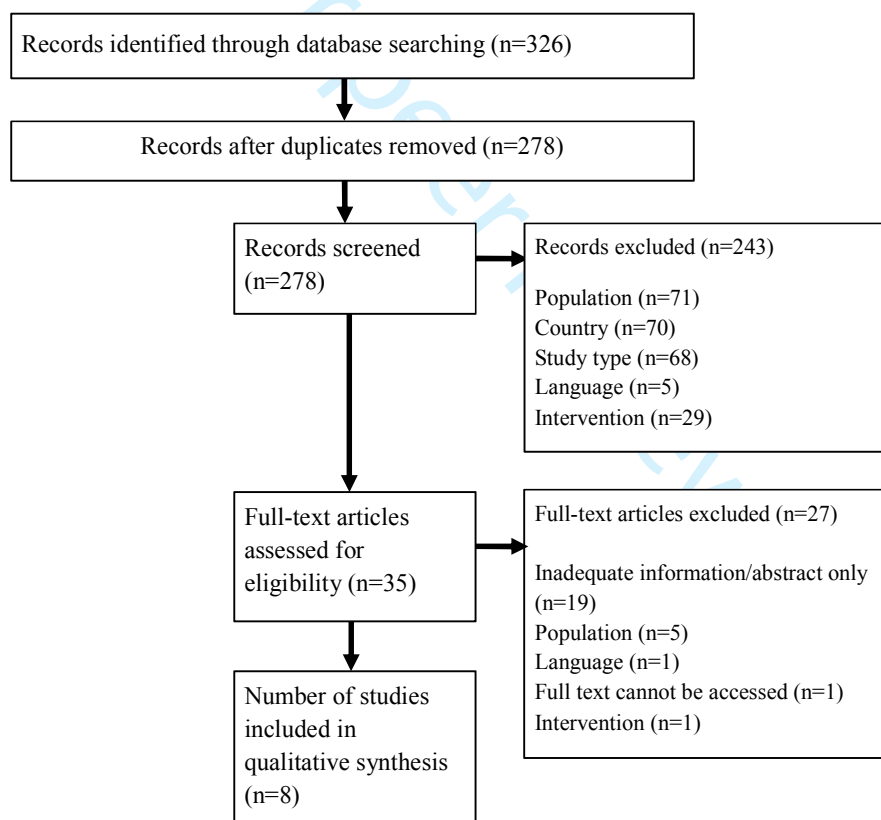

An overview of study setting, population and intervention/comparator is given in Table 1, Table 2 presents an overview of the study characteristics. A tabular overview of the critical appraisal is provided in the supplementary material.

Table 1: Overview of identified studies

| Authors                                                                                                                                                                                                                                                                                                                       | Population                                                                     | Country                               | Intervention/s and comparator/s                                                                   |
|-------------------------------------------------------------------------------------------------------------------------------------------------------------------------------------------------------------------------------------------------------------------------------------------------------------------------------|--------------------------------------------------------------------------------|---------------------------------------|---------------------------------------------------------------------------------------------------|
| Allsup et al (2004), [26]                                                                                                                                                                                                                                                                                                     | Low-risk aged 65-74                                                            | UK                                    | Standard influenza vaccination versus no intervention                                             |
| Baio et al (2006), [27]                                                                                                                                                                                                                                                                                                       | Unknown risk aged $\geq 65$                                                    | Italy                                 | Adjuvanted vaccination or standard vaccination versus no intervention                             |
| Brydak et al (2012), [28]                                                                                                                                                                                                                                                                                                     | Mixed risk aged $\geq 65$                                                      | Poland                                | Reimbursed vaccination versus no intervention                                                     |
| Lugner et al (2012), [29]                                                                                                                                                                                                                                                                                                     | Mixed risk aged $\geq 65$                                                      | Germany, Netherlands and UK           | Standard vaccination versus no intervention                                                       |
| Meier et al (2015), [30]                                                                                                                                                                                                                                                                                                      | Mixed risk aged $\geq 65$                                                      | UK                                    | Quadrivalent influenza vaccination versus trivalent influenza vaccination                         |
| Piercy et al (2004), [31]                                                                                                                                                                                                                                                                                                     | High-risk (suffering from lung or heart disease) elderly people aged $\geq 65$ | France                                | Adjuvanted vaccination versus standard vaccination                                                |
| Postma et al (1999), [32]                                                                                                                                                                                                                                                                                                     | Mixed risk aged $\geq 65$                                                      | Netherlands                           | Standard vaccination versus no intervention                                                       |
| Scuffham & West (2002), [33]                                                                                                                                                                                                                                                                                                  | Unknown risk aged $\geq 65$ or 60 (country differences)                        | England and Wales, France and Germany | Opportunistic vaccination versus no vaccination, comprehensive vaccination versus no intervention |
| <p><b>Note:</b> high-risk refers to the elderly population with another condition or circumstance that places them at a greater risk of complications, e.g. respiratory conditions. Low-risk refers to the elderly population, who aside from being older, would not be considered to fall into any high-risk categories.</p> |                                                                                |                                       |                                                                                                   |



Table 2: Study design and headline results

| Authors                   | Study design                                                                                                                                                  | Evaluation details                                                                                                                                                                                                                             | Data source/s                                                                                                                                                                                                                                                                                                                |
|---------------------------|---------------------------------------------------------------------------------------------------------------------------------------------------------------|------------------------------------------------------------------------------------------------------------------------------------------------------------------------------------------------------------------------------------------------|------------------------------------------------------------------------------------------------------------------------------------------------------------------------------------------------------------------------------------------------------------------------------------------------------------------------------|
| Allsup et al (2004), [26] | <ul style="list-style-type: none"> <li>Evaluation type: CEA and CUA</li> <li>Measure of health benefit: deaths averted and QALYs gained</li> </ul>            | <ul style="list-style-type: none"> <li>Type of study: RCT based economic evaluation</li> <li>Perspective: healthcare provider</li> <li>Time horizon: lifetime</li> <li>Price year: NR</li> </ul>                                               | The main source of data was a prospective, single-blind, randomised, placebo-controlled clinical trial. Some parameters (e.g. baseline hospitalisation rate) were supplemented with hospital data and/or clinician expert assumptions.                                                                                       |
| Baio et al (2006), [27]   | <ul style="list-style-type: none"> <li>Evaluation type: CEA</li> <li>Measure of health benefit: deaths averted</li> </ul>                                     | <ul style="list-style-type: none"> <li>Type of study: model based economic evaluation (Bayesian network model)</li> <li>Perspective: healthcare provider</li> <li>Time horizon: NR</li> <li>Price year: NR</li> </ul>                          | Observational study data from 4 GP databases over 3 flu seasons was used for efficacy. The remainder of the evidence sources are unclear (not specified).                                                                                                                                                                    |
| Brydak et al (2012), [28] | <ul style="list-style-type: none"> <li>Evaluation type: CUA</li> <li>Measure of health benefit: deaths averted, life-years gained and QALYs gained</li> </ul> | <ul style="list-style-type: none"> <li>Type of study: model based economic evaluation (decision tree)</li> <li>Perspective: healthcare provider</li> <li>Time horizon: lifetime</li> <li>Price year: 2009</li> </ul>                           | Published data specific to Poland was used to inform the model where possible. It was noted that in some cases Polish data was not available and US data had to be used (e.g. hospitalisations).                                                                                                                             |
| Lugner et al (2012), [29] | <ul style="list-style-type: none"> <li>Evaluation type: CUA</li> <li>Measure of health benefit: QALYs gained</li> </ul>                                       | <ul style="list-style-type: none"> <li>Type of study: model based economic evaluation (dynamic transmission model)</li> <li>Perspective: healthcare provider and societal</li> <li>Time horizon: lifetime</li> <li>Price year: 2008</li> </ul> | National data sources were used for demographic, resource use and cost data. Where evidence was not available for Germany and the UK, data from the Netherlands was used (e.g. hospitalisations). Vaccine efficacy was taken from a published review and meta-analysis of studies from multiple countries/influenza seasons. |

|                                                                                                                                                                                                                    |                                                                                                                                                           |                                                                                                                                                                                                                                                                   |                                                                                                                                                                                                                                                                                                |
|--------------------------------------------------------------------------------------------------------------------------------------------------------------------------------------------------------------------|-----------------------------------------------------------------------------------------------------------------------------------------------------------|-------------------------------------------------------------------------------------------------------------------------------------------------------------------------------------------------------------------------------------------------------------------|------------------------------------------------------------------------------------------------------------------------------------------------------------------------------------------------------------------------------------------------------------------------------------------------|
| <p>Meier et al (2015), [30]</p>                                                                                                                                                                                    | <ul style="list-style-type: none"> <li>• Evaluation type: CEA and CUA</li> <li>• Measure of health benefit: QALYs gained</li> </ul>                       | <ul style="list-style-type: none"> <li>• Type of study: model based economic evaluation (Markov model)</li> <li>• Perspective: healthcare provider (societal as a secondary analysis)</li> <li>• Time horizon: lifetime</li> <li>• Price year: 2012/13</li> </ul> | <p>National data sources were used for incidence, costs, utilities, complications and mortality data. Vaccine efficacy was taken from a published review of studies from multiple countries/influenza seasons. Over-the-counter medication usage was estimated from previous publications.</p> |
| <p>Piercy et al (2004), [31]</p>                                                                                                                                                                                   | <ul style="list-style-type: none"> <li>• Evaluation type: CEA</li> <li>• Measure of health benefit: deaths averted and life-years gained</li> </ul>       | <ul style="list-style-type: none"> <li>• Type of study: model based economic evaluation (decision tree)</li> <li>• Perspective: healthcare provider</li> <li>• Time horizon: lifetime</li> <li>• Price year: NR</li> </ul>                                        | <p>A variety of evidence sources were used, including national data, published literature and expert opinion. When French data could not be sourced (e.g. hospitalisations), data from other European countries was used.</p>                                                                  |
| <p>Postma et al (1999), [32]</p>                                                                                                                                                                                   | <ul style="list-style-type: none"> <li>• Evaluation type: CEA</li> <li>• Measure of health benefit: life years gained</li> </ul>                          | <ul style="list-style-type: none"> <li>• Type of study: model based economic evaluation (decision tree)</li> <li>• Perspective: healthcare provider</li> <li>• Time horizon: lifetime</li> <li>• Price year: 1995</li> </ul>                                      | <p>National data and published literature from the Netherlands were used for parameter values. Vaccine efficacy was taken from a published review and meta-analysis of studies from multiple countries/influenza seasons.</p>                                                                  |
| <p>Scuffham &amp; West (2002), [33]</p>                                                                                                                                                                            | <ul style="list-style-type: none"> <li>• Evaluation type: CEA</li> <li>• Measure of health benefit: life years gained and morbidity days saved</li> </ul> | <ul style="list-style-type: none"> <li>• Type of study: model based economic evaluation (decision tree)</li> <li>• Perspective: healthcare provider</li> <li>• Time horizon: lifetime</li> <li>• Price year: 2000</li> </ul>                                      | <p>Evidence sources included published studies, national databases and expert opinion. In some cases country specific data were not available for all parameters and it was taken from another country in the study (e.g. vaccine efficacy came from a US study).</p>                          |
| <p><b>Key:</b> CEA, cost-effectiveness analysis; CUA, cost-utility analysis; ICER, incremental cost-effectiveness ratio; NR, not reported; QALY, quality-adjusted life-year; RCT, randomised controlled trial.</p> |                                                                                                                                                           |                                                                                                                                                                                                                                                                   |                                                                                                                                                                                                                                                                                                |

### Population characteristics

The susceptibility of the population has important implications for the rate of complications; if more people are at risk of complications, vaccination is likely to produce larger health gains. One study considered the low-risk elderly population alone, [26] and another study focused purely on the high-risk population, [31]. Another study compared results between the low and high-risk population, [32]. Among the remaining studies the high-risk proportion varied from 35% to 81% of the population and was variable by country, [28–30,32]. Two studies did not report the proportion at high-risk, [27,33].

### Interventions

Influenza vaccination was considered in all studies, with three studies including two vaccine types, [27,30,31]. Influenza vaccination consists of a single dose vaccination given annually to provide resistance to influenza. Vaccination intervention arms included vaccination rates of between 40%–90% (mean 65%). The comparator was almost exclusively no intervention, [26–31,33,34].

Vaccination rates in the no intervention arm varied from 0 to 68% in the high-risk population. One study included anti-viral drugs as a comparator, but did not directly compare it to a vaccination intervention arm, [33,35,36].

### Costs and Outcomes

Four studies undertook a cost-effectiveness analysis alone, with the measure of health benefit provided in terms of life years gained or deaths averted, [27,31–33], 2 studies performed a cost-utility analysis with quality-adjusted life-years (QALYs) as the measure of health benefit, [29,30], and 2 studies included both cost-effectiveness and cost-utility analyses, [26,28]. All studies assessed life-years gained as a result of avoiding death related to influenza complications. In the 4 studies reporting cost-utility results, one study accounted for morbidity by applying lost utility related to mortality to estimate QALYs, [26]. The three other studies also accounted for short-term changes in utility as a result of having influenza, [28–30].

Seven out of 8 studies used a one year time horizon for costs, consistent with vaccination covering one season and the short-term/immediate associated costs, therefore discounting costs was not relevant, [26–29,31–33]. The remaining study considered repeat vaccinations and costs each flu season over a lifetime, [30]. Where relevant, studies applied country-specific guidelines for discounting outcomes; ranging from 1.5% to 5% annually.

All studies considered cases of influenza/ILI and associated hospitalisations, mortality, primary care visits and treatments (e.g. painkillers). One study accounted for vaccination side effects, but only in terms of cost (not health), [33].

1  
2  
3 Six studies used a healthcare payer perspective and considered direct costs alone, [26–28,31–33]. One  
4 study also included a societal perspective as a sensitivity analysis, [30]. Indirect societal costs were  
5 included in one study in the form of productivity losses, by calculating herd immunity and subsequent  
6 benefits in the working age population, [29].  
7  
8

9  
10 All studies included costs associated with purchasing vaccines, influenza related treatments, primary  
11 care visits and hospitalisations. Six studies included administration costs, [26,28,29,31–33]. One  
12 study included vaccine side effect costs, [33]. Transportation costs, over-the-counter medication costs  
13 and private nursing home costs were considered in the societal perspective of one study, [30].  
14

15 Production losses arising in the younger population as a result of influenza were included in one  
16 study, relevant due to the inclusion of herd immunity effects, [29]. One study included a doctor  
17 incentive/promotion fee, to increase the uptake of vaccination in the intervention arm, [26].  
18  
19

## 20 21 **Study results**

22  
23 Key study outcomes are given in Table 3.  
24  
25  
26  
27  
28  
29  
30  
31  
32  
33  
34  
35  
36  
37  
38  
39  
40  
41  
42  
43  
44  
45  
46  
47  
48  
49  
50  
51  
52  
53  
54  
55  
56  
57  
58  
59  
60

Table 3: Key study outputs

| Study                     | Intervention and comparator                      | Net health benefits (per patient)                   | Net costs (per patient) | Incremental cost-effectiveness ratio*                                                        | Headline results                                                                                                                                                                                                                                                       |
|---------------------------|--------------------------------------------------|-----------------------------------------------------|-------------------------|----------------------------------------------------------------------------------------------|------------------------------------------------------------------------------------------------------------------------------------------------------------------------------------------------------------------------------------------------------------------------|
| Allsup et al (2004), [26] | Vaccination versus no intervention               | 0.000007 fewer deaths and 0.000044 additional QALYs | € 5.37*                 | €3,576,908 per death avoided, €459,350 per life-year gained and €572,305 per QALY gained     | Influenza vaccination was judged not to be cost-effective in the low-risk elderly population.                                                                                                                                                                          |
| Baio et al (2006), [27]   | Adjuvanted vaccination versus no intervention    | NR                                                  | -€3.76                  | Adjuvanted vaccine dominated no intervention (per death averted)                             | Adjuvanted vaccine was shown to be cost-effective against the standard vaccine and no intervention strategies. Both vaccination types were cost-effective against no intervention.                                                                                     |
|                           | Standard vaccination versus no intervention      | NR                                                  | -€1.91                  | Standard vaccine dominated no intervention (per death averted)                               |                                                                                                                                                                                                                                                                        |
| Brydak et al (2012), [28] | Reimbursed vaccination versus no intervention    | NR                                                  | €22.61                  | €11,790 per QALY gained, €58,981 cost per death avoided and €6,881 per life-year gained      | Introducing public funding of influenza vaccination for people aged 65 and over to increase coverage was cost-effective compared to the status quo.                                                                                                                    |
| Lugner et al (2012), [29] | Vaccination versus no intervention (Germany)     | NR                                                  | €13.22                  | €1,065 per QALY gained (direct costs) and dominant per QALY gained (indirect costs included) | In general, vaccination was shown to be a cost-effective strategy. Early vaccination strategies are more favourable with lower total costs and cost per QALY gained. The inclusion of indirect costs makes the early vaccination strategies dominant in all countries. |
|                           | Vaccination versus no intervention (UK)          | NR                                                  | €17.19                  | €4,621 per QALY gained (direct costs) and dominant per QALY gained (indirect costs included) |                                                                                                                                                                                                                                                                        |
|                           | Vaccination versus no intervention (Netherlands) | NR                                                  | €17.62                  | €1,338 per QALY gained (direct costs) and dominant per QALY gained (indirect costs included) |                                                                                                                                                                                                                                                                        |

|    |                                                                                                                                     |                                                                           |                                                                    |        |                                                                                                 |                                                                                                                                                              |  |  |
|----|-------------------------------------------------------------------------------------------------------------------------------------|---------------------------------------------------------------------------|--------------------------------------------------------------------|--------|-------------------------------------------------------------------------------------------------|--------------------------------------------------------------------------------------------------------------------------------------------------------------|--|--|
| 1  |                                                                                                                                     |                                                                           |                                                                    |        |                                                                                                 |                                                                                                                                                              |  |  |
| 2  |                                                                                                                                     |                                                                           |                                                                    |        |                                                                                                 |                                                                                                                                                              |  |  |
| 3  |                                                                                                                                     |                                                                           |                                                                    |        |                                                                                                 |                                                                                                                                                              |  |  |
| 4  |                                                                                                                                     |                                                                           |                                                                    |        |                                                                                                 |                                                                                                                                                              |  |  |
| 5  | Meier et al (2015), [30]                                                                                                            | Quadrivalent influenza vaccination versus trivalent influenza vaccination | NR                                                                 | NR     | £11,998 per QALY                                                                                | Quadrivalent vaccination is cost-effective compared with trivalent vaccination in the UK.                                                                    |  |  |
| 6  |                                                                                                                                     |                                                                           |                                                                    |        |                                                                                                 |                                                                                                                                                              |  |  |
| 7  |                                                                                                                                     |                                                                           |                                                                    |        |                                                                                                 |                                                                                                                                                              |  |  |
| 8  | Piercy et al (2004), [31]                                                                                                           | Adjuvanted vaccination versus standard vaccination                        | 0.003397 fewer ILI cases, 0.000043 deaths avoided and 0.000300 LYG | €1.31  | €30,503 per death avoided and €6,131 per LYG                                                    | Results were mixed according to the different scenarios for the strain of the influenza virus considered.                                                    |  |  |
| 9  |                                                                                                                                     |                                                                           |                                                                    |        |                                                                                                 |                                                                                                                                                              |  |  |
| 10 |                                                                                                                                     |                                                                           |                                                                    |        |                                                                                                 |                                                                                                                                                              |  |  |
| 11 |                                                                                                                                     |                                                                           |                                                                    |        |                                                                                                 |                                                                                                                                                              |  |  |
| 12 |                                                                                                                                     |                                                                           |                                                                    |        |                                                                                                 |                                                                                                                                                              |  |  |
| 13 | Postma et al (1999), [32]                                                                                                           | Vaccination versus no intervention                                        | NR                                                                 | NR     | €2,468 per LYG (all elderly people), €9,355 per LYG (low-risk) and dominant per LYG (high-risk) | Population-wide influenza vaccination for elderly people was found to be cost-effective. More favourable results were estimated in the high-risk population. |  |  |
| 14 |                                                                                                                                     |                                                                           |                                                                    |        |                                                                                                 |                                                                                                                                                              |  |  |
| 15 |                                                                                                                                     |                                                                           |                                                                    |        |                                                                                                 |                                                                                                                                                              |  |  |
| 16 |                                                                                                                                     |                                                                           |                                                                    |        |                                                                                                 |                                                                                                                                                              |  |  |
| 17 | Scuffham and West (2002), [33]                                                                                                      | Opportunistic vaccination versus no intervention (England)                | 0.547400 fewer morbidity days and 0.001040 LYG                     | -€1.89 | Dominated per LYG gained                                                                        | Vaccination strategies were cost-effective versus no intervention.                                                                                           |  |  |
| 18 |                                                                                                                                     |                                                                           |                                                                    |        |                                                                                                 |                                                                                                                                                              |  |  |
| 19 |                                                                                                                                     |                                                                           |                                                                    |        |                                                                                                 |                                                                                                                                                              |  |  |
| 20 |                                                                                                                                     |                                                                           |                                                                    |        |                                                                                                 |                                                                                                                                                              |  |  |
| 21 |                                                                                                                                     |                                                                           |                                                                    |        |                                                                                                 |                                                                                                                                                              |  |  |
| 22 |                                                                                                                                     |                                                                           |                                                                    |        |                                                                                                 |                                                                                                                                                              |  |  |
| 23 |                                                                                                                                     | Comprehensive vaccination versus no intervention (England)                | 1.065400 fewer morbidity days and 0.002020 LYG                     | -€0.84 | Dominated per LYG                                                                               |                                                                                                                                                              |  |  |
| 24 |                                                                                                                                     |                                                                           |                                                                    |        |                                                                                                 |                                                                                                                                                              |  |  |
| 25 |                                                                                                                                     | Opportunistic vaccination versus no intervention (France)                 | 0.822500 fewer morbidity days and 0.001470 LYG                     | €2.11  | €1,437 per LYG                                                                                  |                                                                                                                                                              |  |  |
| 26 |                                                                                                                                     |                                                                           |                                                                    |        |                                                                                                 |                                                                                                                                                              |  |  |
| 27 |                                                                                                                                     | Comprehensive vaccination versus no intervention (France)                 | 1.011300 fewer morbidity days and 0.001800 LYG                     | €6.53  | €3,623 per LYG                                                                                  |                                                                                                                                                              |  |  |
| 28 |                                                                                                                                     |                                                                           |                                                                    |        |                                                                                                 |                                                                                                                                                              |  |  |
| 29 |                                                                                                                                     | Opportunistic vaccination versus no intervention (Germany)                | 0.479500 fewer morbidity days and 0.000780 LYG                     | €2.87  | €3,676 per LYG                                                                                  |                                                                                                                                                              |  |  |
| 30 |                                                                                                                                     |                                                                           |                                                                    |        |                                                                                                 |                                                                                                                                                              |  |  |
| 31 |                                                                                                                                     | Comprehensive vaccination versus no intervention (Germany)                | 0.760200 fewer morbidity days and 0.001240 LYG                     | €8.69  | €7,016 per LYG                                                                                  |                                                                                                                                                              |  |  |
| 32 |                                                                                                                                     |                                                                           |                                                                    |        |                                                                                                 |                                                                                                                                                              |  |  |
| 33 |                                                                                                                                     |                                                                           |                                                                    |        |                                                                                                 |                                                                                                                                                              |  |  |
| 34 |                                                                                                                                     |                                                                           |                                                                    |        |                                                                                                 |                                                                                                                                                              |  |  |
| 35 |                                                                                                                                     |                                                                           |                                                                    |        |                                                                                                 |                                                                                                                                                              |  |  |
| 36 |                                                                                                                                     |                                                                           |                                                                    |        |                                                                                                 |                                                                                                                                                              |  |  |
| 37 | <b>Key:</b> ICER, incremental cost-effectiveness ratio; LYG, life-years gained; NR, not reported; QALY, quality-adjusted life-year. |                                                                           |                                                                    |        |                                                                                                 |                                                                                                                                                              |  |  |
| 38 | * Trial cost only reported (not actual modelled costs).                                                                             |                                                                           |                                                                    |        |                                                                                                 |                                                                                                                                                              |  |  |
| 39 |                                                                                                                                     |                                                                           |                                                                    |        |                                                                                                 |                                                                                                                                                              |  |  |
| 40 |                                                                                                                                     |                                                                           |                                                                    |        |                                                                                                 |                                                                                                                                                              |  |  |
| 41 |                                                                                                                                     |                                                                           |                                                                    |        |                                                                                                 |                                                                                                                                                              |  |  |
| 42 |                                                                                                                                     |                                                                           |                                                                    |        |                                                                                                 |                                                                                                                                                              |  |  |
| 43 |                                                                                                                                     |                                                                           |                                                                    |        |                                                                                                 |                                                                                                                                                              |  |  |
| 44 |                                                                                                                                     |                                                                           |                                                                    |        |                                                                                                 |                                                                                                                                                              |  |  |
| 45 |                                                                                                                                     |                                                                           |                                                                    |        |                                                                                                 |                                                                                                                                                              |  |  |
| 46 |                                                                                                                                     |                                                                           |                                                                    |        |                                                                                                 |                                                                                                                                                              |  |  |
| 47 |                                                                                                                                     |                                                                           |                                                                    |        |                                                                                                 |                                                                                                                                                              |  |  |

1  
2  
3 The total cost of vaccination varied from €8.50 to €35.95 per person. Differences between studies  
4 mainly occurred due to variation in administration costs rather than variation in vaccine cost; lower  
5 costs were associated with opportunistic vaccination. The overall net cost of intervention was variable  
6 as shown in Table 2 but in some cases, the vaccination costs were offset by savings elsewhere.  
7  
8

9  
10 Vaccination appears to be cost effective throughout the studies for both the primary and sensitivity  
11 analyses conducted, with the exception of Allsup et al study (2004) which reported a significantly  
12 higher ICER, [26]. This study focused on the low-risk population only. In addition, it applied lower  
13 reductions in the risk of hospitalisation from vaccination and lower costs of hospitalisations. It also  
14 applied a cost vaccination promotion where the other studies did not, increasing the validity of costs  
15 as this is likely to be needed to reach high vaccination levels. This was also the only study completed  
16 alongside a randomised controlled trial, the remainder were economic models using secondary data  
17 sources.  
18  
19  
20  
21

22 The two studies that reported probabilistic sensitivity analysis estimated that vaccination would be  
23 cost effective in between 68% to 87% cases, [28,30]. Scenario and one-way sensitivity analysis  
24 demonstrated key variables to be the incidence of influenza, vaccine efficacy, discount rates and  
25 complication rates (mortality and hospitalisation). In general, studies showed that despite parameter  
26 uncertainty, the majority of tested scenarios still demonstrated vaccination to be cost effective.  
27  
28  
29

30 Adjuvanted vaccination, whilst associated with a higher cost of vaccination, was cost effective when  
31 compared to standard vaccination as higher efficacy rates lead to increased health benefits, [27,30,31].  
32 As expected, the vaccination of high-risk individuals was demonstrated to be more cost effective than  
33 vaccinating low-risk individuals, as this population is more susceptible to complications, which are  
34 costly and negatively impact quality of life, [32]. Passive vaccination strategies were found to be  
35 more cost effective than comprehensive/targeted strategies, [30,33]. One model included transmission  
36 rates and captured externalities arising from herd immunity, [29]. When these indirect effects were  
37 included results became more favourable, as it demonstrated cost savings.  
38  
39  
40  
41  
42  
43

### 44 **Critical appraisal**

45  
46 Studies were critically appraised to determine the overall quality of the evidence base; a summary is  
47 given in supplementary data. None of the studies reported all information required for data extraction,  
48 or to conform to the WHO guidelines or recommended checklists for economic evaluations, [22,37–  
49 39]. In some cases there was a failure to report fundamental assumptions, design and inputs, which  
50 means that the risk of bias is difficult to judge. These factors indicate uncertainty about the robustness  
51 of the overall result that vaccination is cost-effective.  
52  
53  
54

### 55 **Measure of health benefit**

1  
2  
3 The robustness of QALY estimates is questionable due to the limited relevant evidence and small  
4 study samples of utility studies. A review concluded that no utility studies using robust methods were  
5 available for influenza, which was reflected in the cost-utility evaluations identified, [40]. Lugner et al  
6 (2012) took utility decrements relating to influenza from an English postal survey of 288 patients with  
7 confirmed influenza, using the European Quality of life 5-dimension health questionnaire (EQ-5D),  
8 [29,41]. The generalisability of this study to the elderly Dutch population is difficult to assess as  
9 patient characteristics were not reported. Meier et al (2015) and Brydak et al (2012) applied utility  
10 values taken from a survey of 15 working age healthcare workers in the US with utilities scored using  
11 the health utilities index, [28,30,42]. This is arguably not relevant to the elderly population. The WHO  
12 guidelines recommend that economic evaluations are cost-utility analyses, however without robust  
13 utility data, cost-utility evaluations will have limited validity, [37].  
14  
15  
16  
17  
18  
19

20 ILI was used in all studies as a proxy for influenza. The severity and subsequent cost of influenza can  
21 vary substantially, therefore there are concerns that this outcome is too broad, [43]. However, this is  
22 the primary end-point of clinical trials and subsequently studies are restricted by this, [44]. Longer-  
23 term outcomes associated with influenza were not considered; likely due to a lack of robust clinical  
24 data and the impact of confounding factors in the long-term, [12]. The likely direction of bias caused  
25 by excluding long-term outcomes is unclear, it may understate the value of vaccination if it increases  
26 a person's health over time, or may overstate the value of vaccination if side effects occur in the long-  
27 term.  
28  
29  
30  
31

### 32 Costs

33  
34 The majority of studies considered direct costs only. This approach is justified as indirect costs are  
35 less important in a retired population. Societal costs (e.g. transport and over-the-counter drugs) are  
36 likely to be minimal due to the nature of the illness. Appropriately, the only study that included  
37 productivity losses did so because they considered herd immunity effects in the working age  
38 population, [29]. A single study included vaccination side effect costs (by including a GP consultation  
39 cost for patients experiencing side effects); however, these are rare and usually require only minimal  
40 medical attention, [33]. This was supported by sensitivity analysis demonstrating that the cost of side  
41 effects had little impact on results. Only 1 study applied costs to promote vaccination in the  
42 intervention arm, [26]. No studies considered the cost of service redesign to increase vaccination (e.g.  
43 opening additional clinics) which is likely to be highly relevant for healthcare systems that face an  
44 aging population. Thus, the true cost of vaccination is likely to be underestimated across studies.  
45  
46  
47  
48  
49  
50

### 51 Model

52  
53 On the whole, modelling approaches were relatively simple (e.g. static decision tree models),  
54 reflecting gaps in the evidence base. One study used a dynamic transmission model and was therefore  
55  
56  
57  
58  
59  
60



1  
2  
3 able to capture the impact of transmission and herd immunity. This characterises interactions across  
4 the population and is therefore more reflective of the spread of disease and the indirect benefit for  
5 those not vaccinated, [29]. Other models will underestimate the cost effectiveness of influenza  
6 vaccination, however, WHO guidelines recommend that a static model is acceptable as a more  
7 conservative approach, [37].  
8  
9

10  
11 More complex methodologies may capture the nature of the disease more accurately, however given  
12 the noted lack of clinical evidence it is unlikely that the current evidence base is sufficient to inform  
13 these, [12]. For example, patient-level simulations can also be more precise when modelling  
14 population interactions, [45]. Additionally stochastic models, with events occurring randomly, can  
15 more realistically model epidemics, as these occur by chance of transmission amongst population  
16 interactions, [23].  
17  
18  
19

#### 20 21 Methods to address uncertainty

22  
23 In general, studies did not perform detailed sensitivity analysis, despite many recognising that there  
24 are issues with the evidence base. Methods used to analyse uncertainty were varied, such that results  
25 are not comparable. The WHO recommend that sensitivity analyses for economic evaluations of  
26 vaccines should vary the following 5 parameters as a minimum: discount rates, vaccine efficacy,  
27 influenza incidence, influenza complication rates and vaccine price, [37]. None of the studies  
28 identified varied all of the recommended parameters. Only 2 studies included probabilistic sensitivity  
29 analysis, [28,30]. Most scenarios tested in sensitivity analysis still resulted in favourable cost-  
30 effectiveness results for influenza vaccination. However, this is not a robust conclusion due to the  
31 lack of thorough investigation and transparency shown when conducting sensitivity analysis and  
32 providing ranges for parameters. This restricts our ability to explore transferability of study results to  
33 alternative countries, settings and influenza seasons.  
34  
35  
36  
37  
38  
39

#### 40 41 **Discussion**

42 The majority (7/8) of the identified studies found influenza vaccination to be cost effective in an  
43 elderly European population. Results were sensitive to variations in the strain of influenza incidence,  
44 vaccination type, efficacy and strategy, population risk and modelling characteristics. This is in  
45 alignment with the previous review identified, [34]. However, the robustness of this conclusion is  
46 limited due to the evidence gaps and subsequent uncertainty demonstrated in the literature base, as  
47 well as the limited investigation into this uncertainty. Robust, transparent studies are needed to reduce  
48 parameter uncertainty, focusing on clinical evidence (health benefits and side effects), utilities and  
49 resource use data. Once the data available to inform economic models are more robust, then complex  
50 modelling methods can be utilised to suitably reflect the disease and wider outcomes. Increasing this  
51 evidence base could lead policy makers to reevaluate current recommendations.  
52  
53  
54  
55  
56  
57  
58  
59  
60

1  
2  
3 The review focused on the elderly population, which is one of many high-risk groups. To prioritise  
4 the right groups to target for vaccination, due to cost and resource constraints, decision makers are  
5 likely to need to conduct further reviews of the economic evidence for other high-risk groups. For  
6 example, these analyses might focus on groups with chronic conditions, pregnant women or children.  
7 This would produce a more balanced judgement of where to prioritise intervention.  
8  
9

10  
11 The original search for studies used a single database (NHS EED), increasing the chance of missing  
12 papers that could change the conclusions of the review. However, at the time NHS EED was  
13 comprehensive, searching a wide range of databases, and was regularly updated. The updated search  
14 included more databases. The review included English language articles only, which risks language  
15 bias. Searches were limited to published journal articles. Widening the searches to the grey literature  
16 or unpublished reports may have been more likely to identify studies with inconclusive or negative  
17 cost-effectiveness results. The generalisability of some of the results of this review to other settings  
18 (outside the EU) may be limited, due to inevitable differences resource use, treatment pathways and  
19 population characteristics.  
20  
21  
22  
23  
24

25 This review highlights several areas that would benefit from additional research. Parameter  
26 uncertainty affected the strength of economic evaluations, largely because many of the trials for  
27 vaccine efficacy are underpowered, non-randomised and susceptible to bias, [12]. A number of the  
28 evaluations used the same effectiveness data to estimate model parameters, this will over-represent a  
29 limited evidence base. Without more and stronger quality data to inform parameters economic  
30 evaluations will always be subject to a high degree of uncertainty. Trials for the vaccination cover the  
31 influenza season, typically a 6-month period over winter, [12]. A predominance of short term  
32 evidence in the literature prevented the identified studies from including longer-term outcomes. There  
33 was also a lack of evidence for each country, with studies relying on external data sources with  
34 questionable relevance to their population. Moreover, this evidence gap meant that many studies used  
35 the same sources for certain inputs, potentially over-representing the results of a small and low quality  
36 evidence base. Work to ensure that robust country-relevant data inputs are available would increase  
37 the validity of future evaluations.  
38  
39  
40  
41  
42  
43  
44

45 Future economic evaluations should follow good practice guidelines and ensure that they are  
46 transparently reported to assist reviewers in the future. Economic evaluations conducted alongside a  
47 long-term RCT would be particularly helpful to address evidence gaps. In the future, if the evidence  
48 base expands, more complex modelling techniques may become feasible. These would be able to  
49 capture the epidemiology of the illness, include longer-term outcomes and include the impact of herd  
50 immunity, providing a more accurate assessment of the benefits of vaccination.  
51  
52  
53  
54  
55  
56  
57  
58  
59  
60

### **Contributors**

GE Shields and J Elvidge conducted the literature search with oversight from LM Davies. G Shields wrote the first draft of the manuscript, J Elvidge and LM Davies contributed to the final writing of the paper.

### **Acknowledgements**

The research was completed as part of a master's degree dissertation (Master of Public Health) at The University of Manchester. The authors would like to thank the reviewers of the original dissertation for their helpful comments and suggestions.

### **Competing interests**

All authors have completed the ICMJE uniform disclosure form at [www.icmje.org/coi\\_disclosure.pdf](http://www.icmje.org/coi_disclosure.pdf) and declare no support from any organisation for the submitted work, no financial relationships with any organisations that might have an interest in the submitted work in the previous three years and no other relationships or activities that could appear to have influenced the submitted work.

### **Funding**

This research received no specific grant from any funding agency in the public, commercial or not-for-profit sectors

## References

- 1 World Health Organisation. Influenza (Seasonal). 2015.<http://www.who.int/mediacentre/factsheets/fs211/en/> (accessed 17 Nov2015).
- 2 Monto AS. Seasonal influenza and vaccination coverage. *Vaccine* 2010;**28 Suppl 4**:D33–44. doi:10.1016/j.vaccine.2010.08.027
- 3 Preaud E, Durand L, Macabeo B, *et al.* Annual public health and economic benefits of seasonal influenza vaccination: a European estimate. *BMC Public Health* 2014;**14**:813. doi:10.1186/1471-2458-14-813
- 4 European Centre for Disease Prevention and Control. Seasonal influenza. 2015.[http://ecdc.europa.eu/en/healthtopics/seasonal\\_influenza/Pages/index.aspx](http://ecdc.europa.eu/en/healthtopics/seasonal_influenza/Pages/index.aspx) (accessed 18 Nov2015).
- 5 Mauskopf J, Klesse M, Lee S, *et al.* The burden of influenza complications in different high-risk groups: a targeted literature review. *J Med Econ* 2013;**16**:264–77. doi:10.3111/13696998.2012.752376
- 6 Loerbroeks A, Stock C, Bosch JA, *et al.* Influenza vaccination coverage among high-risk groups in 11 European countries. *Eur J Public Health* 2012;**22**:562–8. doi:10.1093/eurpub/ckr094
- 7 Weiskopf D, Weinberger B, Grubeck-Loebenstein B. The aging of the immune system. *Transpl Int* 2009;**22**:1041–50. doi:10.1111/j.1432-2277.2009.00927.x
- 8 Meier CR, Napalkov PN, Wegmüller Y, *et al.* Population-Based Study on Incidence, Risk Factors, Clinical Complications and Drug Utilisation Associated with Influenza in the United Kingdom. *Eur J Clin Microbiol Infect Dis* 2000;**19**:834–42. doi:10.1007/s100960000376
- 9 Simonsen L, Viboud C, Taylor R, *et al.* The Epidemiology of Influenza and Its Control. In: Rappuoli R, Del Giudice G, eds. *Influenza Vaccines for the Future SE - 2*. Springer Basel 2011. 27–54. doi:10.1007/978-3-0346-0279-2\_2
- 10 Hardelid P, Pebody R, Andrews N. Mortality caused by influenza and respiratory syncytial virus by age group in England and Wales 1999-2010. *Influenza Other Respi Viruses* 2013;**7**:35–45. doi:10.1111/j.1750-2659.2012.00345.x
- 11 Szucs TD. Health economic research on vaccinations and immunisation practices--an introductory primer. *Vaccine* 2005;**23**:2095–103. doi:10.1016/j.vaccine.2005.01.064
- 12 Jefferson T, Di Pietrantonj C, Al-Ansary LA, *et al.* Vaccines for preventing influenza in the elderly. *Cochrane database Syst Rev* 2010;:CD004876. doi:10.1002/14651858.CD004876.pub3
- 13 The Council of the European Union. Council Recommendation of 22 December 2009 on seasonal influenza vaccination. 2009.<http://www.who.int/mediacentre/factsheets/fs211/en/> (accessed 20 Nov2015).
- 14 European Centre for Disease Prevention and Control. Seasonal influenza vaccination in Europe. Overview of vaccination recommendations and coverage rates in the EU Member States for the 2012–13 influenza season. 2015.
- 15 Nagata JM, Hernández-Ramos I, Kurup AS, *et al.* Social determinants of health and seasonal influenza vaccination in adults  $\geq 65$  years: a systematic review of qualitative and quantitative data. *BMC Public Health* 2013;**13**:388. doi:10.1186/1471-2458-13-388
- 16 Dexter LJ, Teare MD, Dexter M, *et al.* Strategies to increase influenza vaccination rates: outcomes of a nationwide cross-sectional survey of UK general practice. *BMJ Open* 2012;**2**. doi:10.1136/bmjopen-2011-000851
- 17 Osterholm MT, Kelley NS, Sommer A, *et al.* Efficacy and effectiveness of influenza vaccines: a systematic review and meta-analysis. *Lancet Infect Dis* 2012;**12**:36–44. doi:10.1016/S1473-3099(11)70295-X
- 18 Haq K, McElhaney JE. Immunosenescence: influenza vaccination and the elderly. *Curr Opin Immunol*

- 2014;**29**:38–42. doi:10.1016/j.coi.2014.03.008
- 19 Jefferson T, Rivetti D, Rivetti A, *et al.* Efficacy and effectiveness of influenza vaccines in elderly people: a systematic review. *Lancet (London, England)* 2005;**366**:1165–74. doi:10.1016/S0140-6736(05)67339-4
- 20 Nixon J, Stoykova B, Glanville J, *et al.* The U.K. NHS economic evaluation database. Economic issues in evaluations of health technology. *Int J Technol Assess Health Care* 2000;**16**:731–42. <http://www.ncbi.nlm.nih.gov/pubmed/11028129> (accessed 17 Nov2015).
- 21 Centre for Reviews and Dissemination. Search strategies. Univ. York. 2014. <http://www.crd.york.ac.uk/crdweb/searchstrategies.asp> (accessed 21 Jul2016).
- 22 Centre for Reviews and Dissemination. NHS Economic Evaluation Database (NHS EED) Handbook. 2007. <http://www.york.ac.uk/inst/crd/pdf/nhseed-handbook2007.pdf> (accessed 18 Dec2015).
- 23 Kim S-Y, Goldie SJ. Cost-effectiveness analyses of vaccination programmes : a focused review of modelling approaches. *Pharmacoeconomics* 2008;**26**:191–215. <http://www.ncbi.nlm.nih.gov/pubmed/18282015> (accessed 17 Nov2015).
- 24 OECD. Prices - Inflation (CPI) - OECD Data. 2015. <https://data.oecd.org/price/inflation-cpi.htm> (accessed 18 Dec2015).
- 25 OECD. Purchasing Power Parities (PPPs) Data. 2015. <http://www.oecd.org/std/prices-ppp/purchasingpowerparitiespppsdata.htm> (accessed 18 Dec2015).
- 26 Allsup S, Haycox A, Regan M, *et al.* Is influenza vaccination cost effective for healthy people between ages 65 and 74 years? A randomised controlled trial. *Vaccine* 2004;**23**:639–45. doi:10.1016/j.vaccine.2004.07.008
- 27 Baio G, Pammolli F, Baldo V, *et al.* Object-oriented influence diagram for cost-effectiveness analysis of influenza vaccination in the Italian elderly population. *Expert Rev Pharmacoecon Outcomes Res* 2006;**6**:293–301. doi:10.1586/14737167.6.3.293
- 28 Brydak L, Roiz J, Faivre P, *et al.* Implementing an influenza vaccination programme for adults aged  $\geq 65$  years in Poland: a cost-effectiveness analysis. *Clin Drug Investig* 2012;**32**:73–85. doi:10.2165/11594030-000000000-00000
- 29 Lugnér AK, van Boven M, de Vries R, *et al.* Cost effectiveness of vaccination against pandemic influenza in European countries: mathematical modelling analysis. *BMJ* 2012;**345**:e4445. doi:10.1136/bmj.e4445
- 30 Meier G, Gregg M, Poulsen Nautrup B. Cost-effectiveness analysis of quadrivalent influenza vaccination in at-risk adults and the elderly: an updated analysis in the U.K. *J Med Econ* 2015;**18**:746–61. doi:10.3111/13696998.2015.1044456
- 31 Piercy J, Ryan J, Megas F. Economic evaluation of MF59 adjuvanted vaccine against influenza in the high-risk elderly population in France. *J Med Econ* Published Online First: 2 December 2008. <http://www.tandfonline.com/doi/abs/10.3111/200407001018#.VktWiXbhDIU> (accessed 17 Nov2015).
- 32 Postma MJ, Bos JM, van Gennepe M, *et al.* Economic evaluation of influenza vaccination. Assessment for The Netherlands. *Pharmacoeconomics* 1999;**16 Suppl 1**:33–40. <http://www.ncbi.nlm.nih.gov/pubmed/10623374> (accessed 17 Nov2015).
- 33 Scuffham PA, West PA. Economic evaluation of strategies for the control and management of influenza in Europe. *Vaccine* 2002;**20**:2562–78. <http://www.ncbi.nlm.nih.gov/pubmed/12057614> (accessed 17 Nov2015).
- 34 Postma MJ, Baltussen RP, Palache AM, *et al.* Further evidence for favorable cost-effectiveness of elderly influenza vaccination. *Expert Rev Pharmacoecon Outcomes Res* 2006;**6**:215–27. doi:10.1586/14737167.6.2.215
- 35 Newcomer JW. Second-generation (atypical) antipsychotics and metabolic effects: a comprehensive literature review. *CNS Drugs* 2005;**19 Suppl 1**:1–93. <http://www.ncbi.nlm.nih.gov/pubmed/15998156>

- (accessed 29 Nov2015).
- 36 World Health Organisation. About antiviral drugs. 2016.<http://www.euro.who.int/en/health-topics/communicable-diseases/influenza/clinical-management/about-antiviral-drugs> (accessed 5 Jan2016).
- 37 Walker DG, Hutubessy R, Beutels P. WHO Guide for standardisation of economic evaluations of immunization programmes. *Vaccine* 2010;**28**:2356–9. doi:10.1016/j.vaccine.2009.06.035
- 38 Drummond MF, Jefferson TO. Guidelines for authors and peer reviewers of economic submissions to the BMJ. The BMJ Economic Evaluation Working Party. *BMJ* 1996;**313**:275–83.<http://www.pubmedcentral.nih.gov/articlerender.fcgi?artid=2351717&tool=pmcentrez&rendertype=abstract> (accessed 13 Nov2015).
- 39 Philips Z, Ginnelly L, Sculpher M, *et al*. Review of guidelines for good practice in decision-analytic modelling in health technology assessment. *Health Technol Assess* 2004;**8**:iii – iv, ix – xi, 1–158.<http://www.ncbi.nlm.nih.gov/pubmed/15361314> (accessed 27 Oct2015).
- 40 van Hoek AJ, Underwood A, Jit M, *et al*. The impact of pandemic influenza H1N1 on health-related quality of life: a prospective population-based study. *PLoS One* 2011;**6**:e17030. doi:10.1371/journal.pone.0017030
- 41 Baguelin M, Hoek AJ Van, Jit M, *et al*. Vaccination against pandemic influenza A/H1N1v in England: a real-time economic evaluation. *Vaccine* 2010;**28**:2370–84. doi:10.1016/j.vaccine.2010.01.002
- 42 Rothberg MB, He S, Rose DN. Management of influenza symptoms in healthy adults. *J Gen Intern Med* 2003;**18**:808–15.<http://www.pubmedcentral.nih.gov/articlerender.fcgi?artid=1494927&tool=pmcentrez&rendertype=abstract> (accessed 17 Nov2015).
- 43 World Health Organisation. World Health Organization. Global epidemiological surveillance standards for influenza. 2013.[http://www.who.int/influenza/resources/documents/WHO\\_Epidemiological\\_Influenza\\_Surveillance\\_Standards\\_2014.pdf?ua=1](http://www.who.int/influenza/resources/documents/WHO_Epidemiological_Influenza_Surveillance_Standards_2014.pdf?ua=1) (accessed 7 Jan2016).
- 44 Jit M, Newall AT, Beutels P. Key issues for estimating the impact and cost-effectiveness of seasonal influenza vaccination strategies. *Hum Vaccin Immunother* 2013;**9**:834–40. doi:10.4161/hv.23637
- 45 Davis S, Stevenson M, Tappenden P, *et al*. NICE DSU TECHNICAL SUPPORT DOCUMENT 15: COST-EFFECTIVENESS MODELLING USING PATIENT-LEVEL SIMULATION. Rep. BY Decis. Support UNIT. 2014.[http://www.nicedsu.org.uk/TSD15\\_Patient-level\\_simulation.pdf](http://www.nicedsu.org.uk/TSD15_Patient-level_simulation.pdf) (accessed 7 Jan2016).

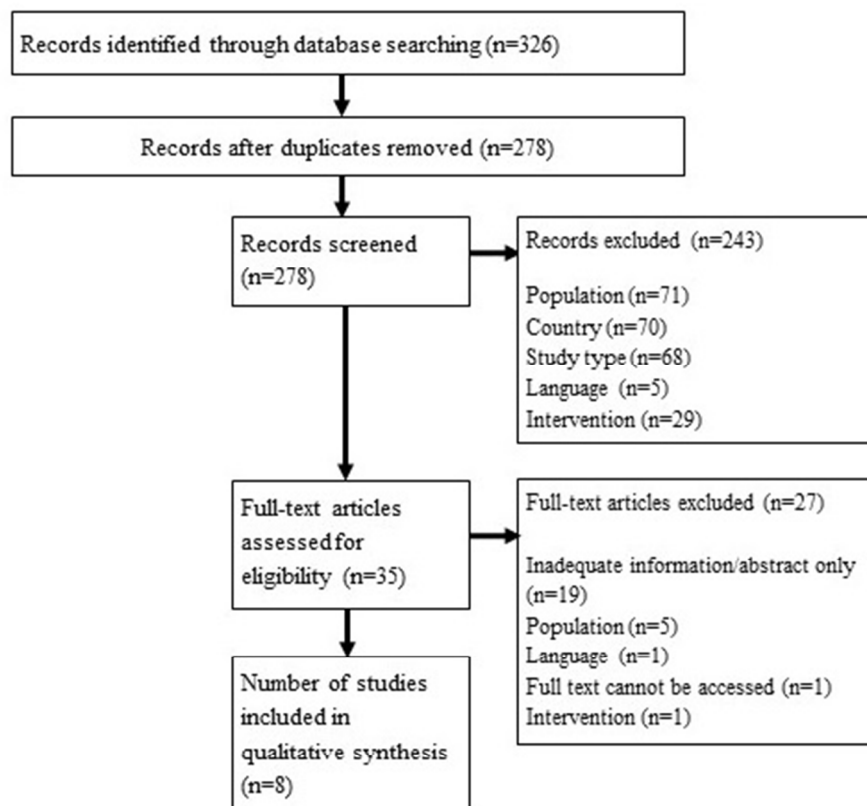

Figure 1: flow diagram of search

143x125mm (96 x 96 DPI)

**Supplementary material****Example search strategy**

1 Influenza, Human/  
2 influenza/  
3 flu/  
4 influenza virus/  
5 seasonal flu/  
6 1 or 2 or 3 or 4 or 5  
7 Vaccination/  
8 vaccine/  
9 7 or 8  
10 Economics/  
11 exp "costs and cost analysis"/  
12 Economics, Dental/  
13 exp economics, hospital/  
14 Economics, Medical/  
15 Economics, Nursing/  
16 Economics, Pharmaceutical/  
17 (economic\$ or cost or costs or costly or costing or price or prices or pricing or  
18 pharmaco-economic\$).ti,ab.  
19 (expenditure\$ not energy).ti,ab.  
20 value for money.ti,ab.  
21 budget\$.ti,ab.  
22 10 or 11 or 12 or 13 or 14 or 15 or 16 or 17 or 18 or 19 or 20  
23 ((energy or oxygen) adj cost).ti,ab.  
24 (metabolic adj cost).ti,ab.  
25 ((energy or oxygen) adj expenditure).ti,ab.  
26 22 or 23 or 24  
27 6 and 9 and 21  
28 26 not 25  
29 letter.pt.  
30 editorial.pt.  
31 historical article.pt.  
32 28 or 29 or 30  
33 27 not 31  
34 exp animals/ not humans/  
35 32 not 33  
36 limit 34 to yr="2014 -Current"



**Blank data extraction form: key study attributes and critical appraisal**

|                                                       |  |
|-------------------------------------------------------|--|
| <b>Subject of the study</b>                           |  |
| Health technology                                     |  |
| Disease                                               |  |
| Type of intervention                                  |  |
| Hypothesis and/or study question                      |  |
| <b>Key elements of the study</b>                      |  |
| Economic study type                                   |  |
| Study population                                      |  |
| Modelling and statistical extrapolation               |  |
| Setting                                               |  |
| Dates to which data relate                            |  |
| Link between effectiveness and cost data              |  |
| <b>Clinical evidence</b>                              |  |
| Clinical and epidemiological data                     |  |
| Parameter value                                       |  |
| Data sources                                          |  |
| Methods to obtain data                                |  |
| <b>Economic analysis</b>                              |  |
| Summary measure of health benefit reported            |  |
| Type of measure of health benefit                     |  |
| Utility or WTP benefit measures - method of valuation |  |
| Discount rate for utility or WTP                      |  |
| <b>Economic analysis</b>                              |  |
| Whose direct cost                                     |  |
| Which direct costs                                    |  |
| Source of resource use                                |  |
| How prices estimated                                  |  |
| Costs discounted                                      |  |

|    |                                                     |  |
|----|-----------------------------------------------------|--|
| 1  |                                                     |  |
| 2  |                                                     |  |
| 3  | Date of price data                                  |  |
| 4  |                                                     |  |
| 5  | Marginal or average costs                           |  |
| 6  |                                                     |  |
| 7  | Resource use separately reported                    |  |
| 8  |                                                     |  |
| 9  | Costs adjusted for inflation and how                |  |
| 10 |                                                     |  |
| 11 | Costs excluded                                      |  |
| 12 |                                                     |  |
| 13 | Adjustments to costs                                |  |
| 14 |                                                     |  |
| 15 | Budget impact (yes or no)                           |  |
| 16 |                                                     |  |
| 17 | Currency                                            |  |
| 18 | <b>Economic analysis</b>                            |  |
| 19 |                                                     |  |
| 20 | Why include/exclude productivity costs              |  |
| 21 |                                                     |  |
| 22 | Source of cost and quantity data                    |  |
| 23 |                                                     |  |
| 24 | Were costs and quantities separately reported       |  |
| 25 |                                                     |  |
| 26 | When resources measured                             |  |
| 27 |                                                     |  |
| 28 | Discounted? Why? Relevant?                          |  |
| 29 | <b>Statistical analysis cost</b>                    |  |
| 30 |                                                     |  |
| 31 | Point estimates used (yes or no)                    |  |
| 32 |                                                     |  |
| 33 | Descriptive statistics used                         |  |
| 34 |                                                     |  |
| 35 | Statistical tests used                              |  |
| 36 |                                                     |  |
| 37 | Parameters tested                                   |  |
| 38 |                                                     |  |
| 39 | Study powered to detect differences?                |  |
| 40 | <b>Analysis uncertainty</b>                         |  |
| 41 |                                                     |  |
| 42 | Parameter uncertainty investigated (yes or no)      |  |
| 43 |                                                     |  |
| 44 | How parameter uncertainty investigated              |  |
| 45 |                                                     |  |
| 46 | Uncertainty investigated all parameters (yes or no) |  |
| 47 |                                                     |  |
| 48 | If not all parameters, which investigated           |  |
| 49 |                                                     |  |
| 50 | Methods or rationale for deterministic analysis     |  |
| 51 |                                                     |  |
| 52 | Probabilistic analysis were distributions defined   |  |
| 53 |                                                     |  |
| 54 | Was structural uncertainty assessed                 |  |
| 55 |                                                     |  |
| 56 | Was variability in data investigated                |  |
| 57 |                                                     |  |
| 58 |                                                     |  |
| 59 |                                                     |  |
| 60 |                                                     |  |

|                                                                 |  |
|-----------------------------------------------------------------|--|
| <b>Estimated benefits</b>                                       |  |
| Total benefits for each intervention                            |  |
| Duration of benefits                                            |  |
| Were side effects/adverse events included                       |  |
| Net (incremental benefit) of intervention-comparator            |  |
| Statistical test of differences in benefit                      |  |
| Sensitivity analysis of benefits only                           |  |
| <b>Cost results</b>                                             |  |
| Net (incremental) cost) of intervention-comparator              |  |
| Statistical test of differences in cost                         |  |
| Sensitivity analysis of costs only                              |  |
| Results of any currency conversion                              |  |
| <b>Synthesis</b>                                                |  |
| Was synthesis reported (yes or no)                              |  |
| If no, was rationale for no synthesis reported                  |  |
| ICER                                                            |  |
| Net benefit                                                     |  |
| Probability cost effective                                      |  |
| Cost acceptability curve (yes or no)                            |  |
| Sub-group analysis or sensitivity analysis (yes or no)          |  |
| Type of sub group or parameters varied in sensitivity analysis  |  |
| ICER                                                            |  |
| Net benefit                                                     |  |
| Probability cost effective                                      |  |
| Cost acceptability curve (yes or no)                            |  |
| <b>Authors conclusions</b>                                      |  |
| Conclusions                                                     |  |
| Choice of comparators                                           |  |
| Was the choice of intervention explicitly justified (yes or no) |  |

|    |                                                                 |  |
|----|-----------------------------------------------------------------|--|
| 1  | Was the choice of intervention implicitly justified (yes or no) |  |
| 2  |                                                                 |  |
| 3  | Key reasons for choice of intervention                          |  |
| 4  |                                                                 |  |
| 5  | Was the choice of comparator explicitly justified (yes or no)   |  |
| 6  |                                                                 |  |
| 7  | Does the choice of intervention or comparator affect the        |  |
| 8  |                                                                 |  |
| 9  |                                                                 |  |
| 10 | <b>Modelling</b>                                                |  |
| 11 |                                                                 |  |
| 12 | Model structure/technique clearly reported                      |  |
| 13 |                                                                 |  |
| 14 | Input data clearly reported                                     |  |
| 15 |                                                                 |  |
| 16 | Input data sources clearly reported                             |  |
| 17 |                                                                 |  |
| 18 | Uncertainty investigated (yes or no)                            |  |
| 19 |                                                                 |  |
| 20 | Methods used to assess uncertainty                              |  |
| 21 |                                                                 |  |
| 22 | Results of uncertainty assessments clear (yes or no)            |  |
| 23 |                                                                 |  |
| 24 | Other positive or negative comments on model                    |  |
| 25 |                                                                 |  |
| 26 | Assessment of validity of model - robust? - biased?             |  |
| 27 |                                                                 |  |
| 28 | <b>Validity effectiveness</b>                                   |  |
| 29 | Sources of data for model parameters                            |  |
| 30 |                                                                 |  |
| 31 | Were data combined to estimate parameters (yes or no)           |  |
| 32 |                                                                 |  |
| 33 | If yes, were methods clearly reported (yes or no)               |  |
| 34 |                                                                 |  |
| 35 | If yes, what methods used to combine data                       |  |
| 36 |                                                                 |  |
| 37 | How were data identified for inclusion                          |  |
| 38 |                                                                 |  |
| 39 | What inclusion criteria                                         |  |
| 40 |                                                                 |  |
| 41 | Justification for choice of data (yes or no)                    |  |
| 42 |                                                                 |  |
| 43 | If yes, what was justification                                  |  |
| 44 |                                                                 |  |
| 45 | What was quality of evidence used to derive parameter estimates |  |
| 46 |                                                                 |  |
| 47 | <b>Validity of health benefit</b>                               |  |
| 48 | Summary measure of benefit (yes or no)                          |  |
| 49 |                                                                 |  |
| 50 | If yes, how derived                                             |  |
| 51 |                                                                 |  |
| 52 | How were utility values measured or identified                  |  |
| 53 |                                                                 |  |
| 54 | To what extent does the measure of benefit cover all relevant   |  |
| 55 |                                                                 |  |
| 56 | <b>Overview of costs</b>                                        |  |
| 57 |                                                                 |  |
| 58 |                                                                 |  |
| 59 |                                                                 |  |
| 60 |                                                                 |  |

|    |                                                                    |  |
|----|--------------------------------------------------------------------|--|
| 1  | Were all relevant costs included for perspective (yes or no)       |  |
| 2  |                                                                    |  |
| 3  | If no, what omitted                                                |  |
| 4  |                                                                    |  |
| 5  | For each cost category, were all relevant cost items included (yes |  |
| 6  |                                                                    |  |
| 7  | If no, what omitted                                                |  |
| 8  |                                                                    |  |
| 9  | Do any omissions affect results or authors conclusions (yes or no) |  |
| 10 |                                                                    |  |
| 11 | <b>Cost details</b>                                                |  |
| 12 |                                                                    |  |
| 13 | Sources of resource use, price and cost data                       |  |
| 14 |                                                                    |  |
| 15 | Price adjustments (yes or no)                                      |  |
| 16 |                                                                    |  |
| 17 | If yes, what price adjustments                                     |  |
| 18 |                                                                    |  |
| 19 | Costs discounted (yes or no)                                       |  |
| 20 |                                                                    |  |
| 21 | If no, appropriate                                                 |  |
| 22 |                                                                    |  |
| 23 | Were any resource use, price or cost data stochastic (yes or no)   |  |
| 24 |                                                                    |  |
| 25 | If yes, any statistical analysis                                   |  |
| 26 |                                                                    |  |
| 27 | Cost data adequately reported yes/no                               |  |
| 28 |                                                                    |  |
| 29 | If no, why                                                         |  |
| 30 |                                                                    |  |
| 31 | Other cost issues                                                  |  |
| 32 |                                                                    |  |
| 33 | Costs valid (unbiased) (yes or no)                                 |  |
| 34 |                                                                    |  |
| 35 | If no, why                                                         |  |
| 36 |                                                                    |  |
| 37 | Costs generalisable (yes or no)                                    |  |
| 38 |                                                                    |  |
| 39 | If no, why                                                         |  |
| 40 |                                                                    |  |
| 41 | <b>Other issues</b>                                                |  |
| 42 |                                                                    |  |
| 43 | Comparisons with other studies (yes or no)                         |  |
| 44 |                                                                    |  |
| 45 | If yes, results of comparison                                      |  |
| 46 |                                                                    |  |
| 47 | Generalisability addressed (yes or no)                             |  |
| 48 |                                                                    |  |
| 49 | If yes, how                                                        |  |
| 50 |                                                                    |  |
| 51 | Selective reporting of results (yes or no)                         |  |
| 52 |                                                                    |  |
| 53 | If yes, in what ways                                               |  |
| 54 |                                                                    |  |
| 55 | Conclusions reflect scope/data                                     |  |
| 56 |                                                                    |  |
| 57 | Authors report the limitations (yes or no)                         |  |
| 58 |                                                                    |  |
| 59 |                                                                    |  |
| 60 |                                                                    |  |

|    |                                                                                            |  |
|----|--------------------------------------------------------------------------------------------|--|
| 1  |                                                                                            |  |
| 2  |                                                                                            |  |
| 3  | If yes, what                                                                               |  |
| 4  |                                                                                            |  |
| 5  | Any other shortcomings yes/no                                                              |  |
| 6  |                                                                                            |  |
| 7  | If yes, what                                                                               |  |
| 8  |                                                                                            |  |
| 9  | <b>Implications</b>                                                                        |  |
| 10 | Authors recommendations                                                                    |  |
| 11 |                                                                                            |  |
| 12 | Recommendations suggested by abstractor                                                    |  |
| 13 |                                                                                            |  |
| 14 | Implications reported by authors                                                           |  |
| 15 |                                                                                            |  |
| 16 | Implications suggested by abstractor                                                       |  |
| 17 |                                                                                            |  |
| 18 | <b>Related publications</b>                                                                |  |
| 19 |                                                                                            |  |
| 20 | Related publications                                                                       |  |
| 21 |                                                                                            |  |
| 22 | Important to review for model                                                              |  |
| 23 |                                                                                            |  |
| 24 | Important to review for systematic review paper                                            |  |
| 25 |                                                                                            |  |
| 26 | <b>Focus on key model attributes</b>                                                       |  |
| 27 | Static or dynamic                                                                          |  |
| 28 |                                                                                            |  |
| 29 | Stochastic or deterministic                                                                |  |
| 30 |                                                                                            |  |
| 31 | Aggregate or individual                                                                    |  |
| 32 |                                                                                            |  |
| 33 | Discrete or continuous                                                                     |  |
| 34 |                                                                                            |  |
| 35 | <b>Key:</b> ICER, incremental cost-effectiveness ratio; WTP, willingness to pay threshold. |  |

Adapted from: [22,23]

**Table summary of critical appraisal**

| <b>Study</b>                                                                | <b>Studies reporting clearly</b> |
|-----------------------------------------------------------------------------|----------------------------------|
| Research question                                                           | 100% [26–33]                     |
| Study design                                                                | 25% [29,30]                      |
| Perspective                                                                 | 87.5% [26–28,30–33]              |
| Intervention                                                                | 100% [26–33]                     |
| Comparators                                                                 | 100% [26–33]                     |
| Study population                                                            | 100% [26–33]                     |
| Method of economic evaluation                                               | 87.5% [26–33]                    |
| <b>Data collection</b>                                                      |                                  |
| Source(s) of effectiveness estimates                                        | 87.5% [26,28,30–33]              |
| Methods of synthesis used to source effectiveness estimates (if applicable) | 37.5% [26,30,33]                 |
| Methods used to value health states and benefits                            | 87.5% [26,28–33]                 |
| Quantities of resource use and costs reported separately                    | 62.5% [26,28,29,31,33]           |
| Methods for resource use and unit costs                                     | 87.5% [26,28,29,31,33]           |
| Price year                                                                  | 62.5% [28–33]                    |
| Price adjustments for inflation or currency conversion                      | 12.5% [29]                       |
| <b>Analysis and interpretation of results</b>                               |                                  |
| Time horizon                                                                | 87.5% [26,28–33]                 |
| Discount rate (if applicable)                                               | 100% [28–33]                     |
| Explanation given if cost or benefits were not discounted (if applicable)   | 100% [26,27]                     |
| Statistical test(s) and confidence intervals given for stochastic variables | 12.5% [26]                       |
| Sensitivity analysis methods                                                | 100% [26–33]                     |
| Choice of variables for sensitivity analysis                                | 87.5% [26,28–33]                 |
| Ranges used in sensitivity analysis                                         | 100% [26–33]                     |
| Appropriate comparisons                                                     | 100% [26–33]                     |
| Incremental analysis reported                                               | 100% [26–33]                     |
| Outcomes presented disaggregated and aggregated                             | 25% [28,33]                      |
| Study question answered                                                     | 100% [26–33]                     |
| Conclusions relevant to study                                               | 100% [26–33]                     |
| Limitations                                                                 | 62.5% [26,28–30,33]              |
| Generalisability issues                                                     | 25% [28,29]                      |
| Comparisons to other studies                                                | 37.5% [26,28,30]                 |

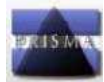

# PRISMA 2009 Checklist

| Section/topic                      | #  | Checklist item                                                                                                                                                                                                                                                                                              | Reported on page #           |
|------------------------------------|----|-------------------------------------------------------------------------------------------------------------------------------------------------------------------------------------------------------------------------------------------------------------------------------------------------------------|------------------------------|
| <b>TITLE</b>                       |    |                                                                                                                                                                                                                                                                                                             |                              |
| Title                              | 1  | Identify the report as a systematic review, meta-analysis, or both.                                                                                                                                                                                                                                         | 1                            |
| <b>ABSTRACT</b>                    |    |                                                                                                                                                                                                                                                                                                             |                              |
| Structured summary                 | 2  | Provide a structured summary including, as applicable: background; objectives; data sources; study eligibility criteria, participants, and interventions; study appraisal and synthesis methods; results; limitations; conclusions and implications of key findings; systematic review registration number. | 2                            |
| <b>INTRODUCTION</b>                |    |                                                                                                                                                                                                                                                                                                             |                              |
| Rationale                          | 3  | Describe the rationale for the review in the context of what is already known.                                                                                                                                                                                                                              | 3                            |
| Objectives                         | 4  | Provide an explicit statement of questions being addressed with reference to participants, interventions, comparisons, outcomes, and study design (PICOS).                                                                                                                                                  | 4                            |
| <b>METHODS</b>                     |    |                                                                                                                                                                                                                                                                                                             |                              |
| Protocol and registration          | 5  | Indicate if a review protocol exists, if and where it can be accessed (e.g., Web address), and, if available, provide registration information including registration number.                                                                                                                               | n/a                          |
| Eligibility criteria               | 6  | Specify study characteristics (e.g., PICOS, length of follow-up) and report characteristics (e.g., years considered, language, publication status) used as criteria for eligibility, giving rationale.                                                                                                      | 5                            |
| Information sources                | 7  | Describe all information sources (e.g., databases with dates of coverage, contact with study authors to identify additional studies) in the search and date last searched.                                                                                                                                  | 4/5                          |
| Search                             | 8  | Present full electronic search strategy for at least one database, including any limits used, such that it could be repeated.                                                                                                                                                                               | Supplementary material       |
| Study selection                    | 9  | State the process for selecting studies (i.e., screening, eligibility, included in systematic review, and, if applicable, included in the meta-analysis).                                                                                                                                                   | 5                            |
| Data collection process            | 10 | Describe method of data extraction from reports (e.g., piloted forms, independently, in duplicate) and any processes for obtaining and confirming data from investigators.                                                                                                                                  | 5                            |
| Data items                         | 11 | List and define all variables for which data were sought (e.g., PICOS, funding sources) and any assumptions and simplifications made.                                                                                                                                                                       | 5 and supplementary material |
| Risk of bias in individual studies | 12 | Describe methods used for assessing risk of bias of individual studies (including specification of whether this was done at the study or outcome level), and how this information is to be used in any data synthesis.                                                                                      | 5 and supplementary material |
| Summary measures                   | 13 | State the principal summary measures (e.g., risk ratio, difference in means).                                                                                                                                                                                                                               | n/a                          |



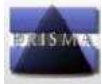

# PRISMA 2009 Checklist

1  
2  
3  
4  
5  
6  
7  
8  
9  
10  
11  
12  
13  
14  
15  
16  
17  
18  
19  
20  
21  
22  
23  
24  
25  
26  
27  
28  
29  
30  
31  
32  
33  
34  
35  
36  
37  
38  
39  
40  
41  
42  
43  
44  
45  
46  
47

|                      |    |                                                                                                                                                           |   |
|----------------------|----|-----------------------------------------------------------------------------------------------------------------------------------------------------------|---|
| Synthesis of results | 14 | Describe the methods of handling data and combining results of studies, if done, including measures of consistency (e.g., $I^2$ ) for each meta-analysis. | 6 |
|----------------------|----|-----------------------------------------------------------------------------------------------------------------------------------------------------------|---|

Page 1 of 2

| Section/topic                 | #  | Checklist item                                                                                                                                                                                           | Reported on page #               |
|-------------------------------|----|----------------------------------------------------------------------------------------------------------------------------------------------------------------------------------------------------------|----------------------------------|
| Risk of bias across studies   | 15 | Specify any assessment of risk of bias that may affect the cumulative evidence (e.g., publication bias, selective reporting within studies).                                                             | 14 and supplementary material    |
| Additional analyses           | 16 | Describe methods of additional analyses (e.g., sensitivity or subgroup analyses, meta-regression), if done, indicating which were pre-specified.                                                         | n/a                              |
| <b>RESULTS</b>                |    |                                                                                                                                                                                                          |                                  |
| Study selection               | 17 | Give numbers of studies screened, assessed for eligibility, and included in the review, with reasons for exclusions at each stage, ideally with a flow diagram.                                          | 6                                |
| Study characteristics         | 18 | For each study, present characteristics for which data were extracted (e.g., study size, PICOS, follow-up period) and provide the citations.                                                             | 7-9                              |
| Risk of bias within studies   | 19 | Present data on risk of bias of each study and, if available, any outcome level assessment (see item 12).                                                                                                | 14-16 and supplementary material |
| Results of individual studies | 20 | For all outcomes considered (benefits or harms), present, for each study: (a) simple summary data for each intervention group (b) effect estimates and confidence intervals, ideally with a forest plot. | 12-13                            |
| Synthesis of results          | 21 | Present results of each meta-analysis done, including confidence intervals and measures of consistency.                                                                                                  | n/a                              |
| Risk of bias across studies   | 22 | Present results of any assessment of risk of bias across studies (see Item 15).                                                                                                                          | 14-16                            |
| Additional analysis           | 23 | Give results of additional analyses, if done (e.g., sensitivity or subgroup analyses, meta-regression [see Item 16]).                                                                                    | n/a                              |
| <b>DISCUSSION</b>             |    |                                                                                                                                                                                                          |                                  |
| Summary of evidence           | 24 | Summarize the main findings including the strength of evidence for each main outcome; consider their relevance to key groups (e.g., healthcare providers, users, and policy makers).                     | 16                               |
| Limitations                   | 25 | Discuss limitations at study and outcome level (e.g., risk of bias), and at review-level (e.g., incomplete retrieval of identified research, reporting bias).                                            | 17                               |
| Conclusions                   | 26 | Provide a general interpretation of the results in the context of other evidence, and implications for future research.                                                                                  | 17                               |
| <b>FUNDING</b>                |    |                                                                                                                                                                                                          |                                  |
| Funding                       | 27 | Describe sources of funding for the systematic review and other support (e.g., supply of data); role of funders for the systematic review.                                                               | 18                               |

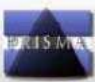

# PRISMA 2009 Checklist

1  
2  
3  
4  
5  
6  
7  
8  
9  
10  
11  
12  
13  
14  
15  
16  
17  
18  
19  
20  
21  
22  
23  
24  
25  
26  
27  
28  
29  
30  
31  
32  
33  
34  
35  
36  
37  
38  
39  
40  
41  
42  
43  
44  
45  
46  
47

*From:* Moher D, Liberati A, Tetzlaff J, Altman DG, The PRISMA Group (2009). Preferred Reporting Items for Systematic Reviews and Meta-Analyses: The PRISMA Statement. PLoS Med 6(6): e1000097. doi:10.1371/journal.pmed1000097

For more information, visit: [www.prisma-statement.org](http://www.prisma-statement.org).

Page 2 of 2

For peer review only

# BMJ Open

## A systematic review of economic evaluations of seasonal influenza vaccination for the elderly population in the European Union

|                                 |                                                                                                                                                                                                                        |
|---------------------------------|------------------------------------------------------------------------------------------------------------------------------------------------------------------------------------------------------------------------|
| Journal:                        | <i>BMJ Open</i>                                                                                                                                                                                                        |
| Manuscript ID                   | bmjopen-2016-014847.R1                                                                                                                                                                                                 |
| Article Type:                   | Research                                                                                                                                                                                                               |
| Date Submitted by the Author:   | 12-Dec-2016                                                                                                                                                                                                            |
| Complete List of Authors:       | Shields, Gemma; University of Manchester, Centre for Health Economics<br>Elvidge, Jamie; University of Manchester, Centre for Health Economics<br>Davies, Linda; University of Manchester, Centre for Health Economics |
| <b>Primary Subject Heading</b>: | Health economics                                                                                                                                                                                                       |
| Secondary Subject Heading:      | Immunology (including allergy), Health policy, Geriatric medicine, Infectious diseases, Public health                                                                                                                  |
| Keywords:                       | HEALTH ECONOMICS, GERIATRIC MEDICINE, Health policy < HEALTH SERVICES ADMINISTRATION & MANAGEMENT, Public health < INFECTIOUS DISEASES                                                                                 |
|                                 |                                                                                                                                                                                                                        |

SCHOLARONE™  
Manuscripts

1  
2  
3 **A systematic review of economic evaluations of seasonal influenza**  
4 **vaccination for the elderly population in the European Union**  
5  
6

7 Gemma E Shields, Jamie Elvidge, Linda M Davies  
8  
9

10 Centre for Health Economics, University of Manchester, Manchester, M13 9PL  
11

12 Gemma E Shields

13 Research Fellow  
14  
15

16 Centre for Health Economics, University of Manchester, Manchester, M13 9PL  
17

18 Jamie Elvidge

19 Research Associate  
20  
21

22 Centre for Health Economics, University of Manchester, Manchester, M13 9PL  
23

24 Professor of Health Economics

25 Linda M Davies  
26  
27

28 **Correspondence to:** gemma.shields@manchester.ac.uk  
29  
30  
31  
32  
33  
34  
35  
36  
37  
38  
39  
40  
41  
42  
43  
44  
45  
46  
47  
48  
49  
50  
51  
52  
53  
54  
55  
56  
57  
58  
59  
60

## Abstract

**Objectives:** The Council of the European Union (EU) has recommended that action should be taken to increase influenza vaccination in the elderly population. The aims were to systematically review and critically appraise economic evaluations for influenza vaccination in the elderly population in the EU.

**Methods:** Electronic searches of the NHS Economic Evaluation, Health Technology Assessment, MEDLINE and Embase databases were run to identify full economic evaluations. Two levels of screening were used, with explicit inclusion criteria applied by two independent reviewers at each stage. Pre-specified data extraction and critical appraisal were performed on identified studies. Results were summarised qualitatively.

**Results:** Of the 326 search results, screening identified 8 relevant studies. Results varied widely, with the incremental cost-effectiveness ratio ranging from being both more effective and cheaper than no intervention to costing €459,350 per life-year gained. Cost-effectiveness was most sensitive to variations in influenza strain, vaccination type and strategy, population and modelling characteristics.

**Conclusions:** Most studies suggest that vaccination is cost-effective (7/8 studies identified at least one cost-effective scenario). All but one study used economic models to synthesise data from different sources. The results are uncertain due to the methods used and the relevance and robustness of the data used. Sensitivity analysis to explore these aspects was limited. Integrated, controlled prospective clinical and economic evaluations and surveillance data are needed to improve the evidence base. This would allow more advanced modelling techniques to characterise the epidemiology of influenza more accurately and improve the robustness of cost-effectiveness estimates.

### Strengths and limitations of this study

- This study systematically reviewed economic evaluations for influenza vaccination in the elderly population in the EU, a practice that is recommended in policy.
- To the authors' knowledge, this search brings the only previous systematic review of economic evidence for influenza vaccination up to date.
- The study summarises and critically appraises the current evidence base and also discusses potential avenues for future research.

1  
2  
3  
4  
5  
6  
7  
8  
9  
10  
11  
12  
13  
14  
15  
16  
17  
18  
19  
20  
21  
22  
23  
24  
25  
26  
27  
28  
29  
30  
31  
32  
33  
34  
35  
36  
37  
38  
39  
40  
41  
42  
43  
44  
45  
46  
47  
48  
49  
50  
51  
52  
53  
54  
55  
56  
57  
58  
59  
60

- The review was limited to English-language studies, there is scope to broaden the search to include other languages and identify further papers.

For peer review only

## Manuscript

### Introduction

Seasonal influenza is a highly contagious acute viral infection, with a risk of complications and mortality. It is important to policy makers because it has a large economic impact, both in terms of costs and population quality of life, [1]. The prevalence of influenza varies each season and is affected by multiple factors (e.g. virus strength and climate). It is a serious public health concern generally and particularly for high-risk groups such as older people, [2–7]. In the European Union the elderly population makes up 18.9% of the population, over 96 million people (2015 figures), [8].

In the elderly population with influenza-like-illness (ILI), hospitalisation risk has been reported to be up to 8.8%, with up to 4.2% admitted cases requiring time in an intensive care unit and a risk of death when admitted to hospital of 3.1% to 13.5%, [5]. Whilst complication rates are lower in the elderly population compared to other high-risk groups, older people are more likely to have chronic conditions and fall into multiple high-risk groups, (e.g. heart failure, Parkinson's disease and asthma), [6,7]. In addition, influenza exacerbates existing chronic conditions (e.g. respiratory conditions) and causes secondary infections (such as pneumonia) that are more frequently recorded as the cause of death, [9]. These factors mean that influenza may contribute to more severe illnesses and be a causal factor of increased mortality risk, rather than the primary recorded cause of death (laboratory testing for the presence of influenza infection is uncommon), [9,10]. Statistical modelling suggests that influenza may be responsible for between 2.5%-8.1% of deaths in the over-75 age group, [9].

Vaccines are the most commonly used intervention to prevent influenza; they work by simulating infection, provoking the body to create antibodies to protect against infection, [11]. Two types are available; trivalent which protects against three viruses, and quadrivalent which protects against four viruses. Vaccines can also contain squalene-based adjuvants (e.g. MF59) which aim to improve the efficacy of vaccines. The Council of the EU recommended that by 2014-15, 75% of the elderly population should be vaccinated against influenza, [12]. The latest published (2012) figures show that the EU mean vaccination coverage is around 44.7% (range: 1% to 77.4%) of the elderly population, substantially short of the EU target, [13].

In the elderly population the aims of vaccination are to reduce the rate of influenza and to decrease the burden of complications (morbidity and mortality) resulting from influenza, although evidence of protection is limited and uncertain in this population, [11,14]. In the adult population aged 18-65, influenza (relative reduction in influenza risk following vaccination) has been reported to have an efficacy rate of 59% [95% CI 51-67] in a pooled analysis of 12 seasons, [14]. As people age the immune system can become compromised and less responsive to vaccination, [15]. When focusing

1  
2  
3 specifically on the elderly population effectiveness appears to be much lower; with one study  
4 reporting 23% efficacy for elderly individuals living in care homes in seasons where vaccine  
5 matching (the degree of similarity between the circulating virus and strain in the vaccine) is good,  
6 [16]. For individuals living in the community the same study noted that vaccines were not statistically  
7 significantly effective at preventing influenza, although well matched vaccines provided benefits in  
8 reducing related admissions to hospital and pneumonia, [16]. In addition, when comparing  
9 effectiveness evidence across populations, evidence in the elderly population is much more reliant on  
10 low-quality studies (e.g. non-randomised cohort studies with small samples), [14,16].  
11  
12  
13  
14

15 It is important that intervention strategies, such as vaccination programmes, provide value for money  
16 in budget-constrained health care systems. As such, in light of the recommendations for influenza  
17 vaccination in the elderly population, and in an environment with an aging population and the issues  
18 discussed above around vaccination effectiveness, relevant economic evaluations are likely to be of  
19 interest to policy makers.  
20  
21  
22  
23

24 This study had two aims, Firstly, to determine whether influenza vaccination interventions were  
25 demonstrated to be cost-effective in older people in the EU. The second aim was to critically appraise  
26 the methods and data to evaluate the validity and robustness of the study findings, to inform policy  
27 makers and future research.  
28  
29  
30

## 31 **Methods**

32  
33 A systematic literature search and narrative review was conducted to identify economic evaluations of  
34 influenza vaccinations in the elderly population in the EU.  
35  
36

### 37 *Search Strategy*

38  
39 Search terms across the databases used included disease-specific terms, e.g. “influenza”; terms for the  
40 intervention, e.g. “vaccination” and terms for economic evaluations, e.g. “cost-effectiveness”. Search  
41 terms and strategies varied slightly according to the database design and functionality. Free-text and  
42 standardised subject terms were used. Alternative spellings were included to capture all potentially  
43 relevant citations. The search strategy was piloted to ensure it identified all known studies and all  
44 studies identified in a previous review. An example search strategy is provided in the supplementary  
45 material.  
46  
47  
48  
49

50 An initial search was run in November 2014, using the NHS Economic Evaluation Database (EED)  
51 and the Health Technology Assessment (HTA) database (via The Cochrane Library). At the time of  
52 initial search the EED database was a reliable source for economic evaluations, using a very precise  
53 search over a wide number of databases to capture relevant studies which helps to reduce the number  
54  
55  
56  
57



1  
2  
3 of irrelevant study results, [17]. NHS EED ceased being updated in March 2015 so the updated search  
4 (November 2015), included the MEDLINE, EMBASE and Econlit databases. The NHS EED search  
5 terms were used to identify economic evaluations, [18].  
6

### 7 8 *Selection* 9

10 Identified citations were manually screened to identify potentially relevant papers to include in the  
11 review, using explicit pre-defined inclusion criteria: the study sample or modelled population had to  
12 be (i) based in the European Union (ii) aged  $\geq 60$  or  $\geq 65$  years (the definition of elderly used in  
13 influenza policies across Europe). Studies did not need to exclusively look at this age group, but had  
14 to present the results for the elderly population separately to other populations if they did consider  
15 wider populations. Studies had to compare the seasonal influenza vaccination intervention to a  
16 comparator intended to reduce the burden of illness associated with influenza (e.g. an alternative  
17 form of vaccination or antiviral treatments) or usual care/no intervention. This meant that the  
18 comparator arm could also include a proportion of people who were vaccinated against influenza. A  
19 fourth inclusion criteria was that studies had to be full economic evaluations; producing an  
20 incremental cost-effectiveness ratio using a health outcome. No restriction was placed on publication  
21 date. The review was limited to English language articles. After screening of titles and abstracts, full  
22 papers were retrieved and screened using the same inclusion criteria.  
23  
24  
25  
26  
27  
28  
29

30 Two reviewers independently screened citations and full papers, with a third reviewer consulted to  
31 resolve any disagreements. The primary reason for study exclusion was recorded at each stage.  
32  
33

### 34 *Data Extraction* 35

36 Comprehensive data extraction was undertaken, in line with the NHS EED handbook and with some  
37 key additions on modelling technique from a review of economic evaluations of vaccinations, [19,20].  
38 Pre-defined data extraction and quality assessment forms (see supplementary material) were used to  
39 extract information on study methodology, results, limitations, evidence gaps and quality for critical  
40 appraisal. Two reviewers extracted data independently, results were compared and discussion, with  
41 any disagreements settled by a third reviewer.  
42  
43  
44  
45

46 Cost figures were converted into 2014 Euros for presentation using the price index for each country  
47 and the purchasing power parity conversion factor to facilitate comparison between studies in  
48 different EU countries, [21,22].  
49  
50

### 51 *Data Synthesis* 52

53 Extracted data were summarised in text and tables. Study characteristics, cost and outcome data were  
54 tabulated and summarised. Critical appraisal was qualitatively synthesised with the help of the  
55  
56  
57  
58  
59  
60

1  
2  
3 checklist. The key aspects assessed included the reporting of key information (e.g. study design and  
4 how parameters were identified), methods used and the validity of cost and health benefits used.  
5

## 6 **RESULTS**

### 7 **Summary of studies**

8  
9  
10 Figure 1 summarises the flow of studies identified and selected for review.

11  
12  
13 An overview of study setting, population and intervention/comparator is given in Table 1, Table 2  
14 presents an overview of the study characteristics. A tabular overview of the critical appraisal is  
15 provided in the supplementary material.  
16  
17  
18  
19  
20  
21  
22  
23  
24  
25  
26  
27  
28  
29  
30  
31  
32  
33  
34  
35  
36  
37  
38  
39  
40  
41  
42  
43  
44  
45  
46  
47  
48  
49  
50  
51  
52  
53  
54  
55  
56  
57  
58  
59  
60

Table 1: Overview of identified studies

| Authors                                     | Population                                                               | Country                     | Intervention/s and comparator/s                                                           | Vaccination coverage in paper and actual reported vaccination coverage, [13] |                               |                                          |
|---------------------------------------------|--------------------------------------------------------------------------|-----------------------------|-------------------------------------------------------------------------------------------|------------------------------------------------------------------------------|-------------------------------|------------------------------------------|
|                                             |                                                                          |                             |                                                                                           | Intervention                                                                 | Comparator                    | Reported vaccination coverage rate, [13] |
| <b>Comparison of vaccination types</b>      |                                                                          |                             |                                                                                           |                                                                              |                               |                                          |
| Baio et al (2006), [23] <sup>a</sup>        | Unknown risk aged ≥65                                                    | Italy                       | MF59 adjuvanted vaccination versus standard non-adjuvanted vaccination                    | 100%                                                                         | 100%                          | 63%                                      |
| Meier et al (2015), [24]                    | Mixed risk aged ≥65 (48% high-risk)                                      | UK                          | Quadrivalent influenza vaccination versus trivalent influenza vaccination                 | 71.3%                                                                        | 71.3%                         | 76%                                      |
| Piercy et al (2004), [25]                   | High-risk (suffering from lung or heart disease) elderly people aged ≥65 | France                      | MF59 adjuvanted vaccination versus standard non-adjuvanted vaccination                    | 61%                                                                          | 61%                           | 53%                                      |
| <b>Comparison of vaccination strategies</b> |                                                                          |                             |                                                                                           |                                                                              |                               |                                          |
| Allsup et al (2004), [26]                   | Low-risk aged 65-74                                                      | UK                          | Inactivated influenza vaccination versus no intervention                                  | 60%                                                                          | 20%                           | 76%                                      |
| Baio et al (2006), [23] <sup>a</sup>        | Unknown risk aged ≥65                                                    | Italy                       | MF59 adjuvanted vaccination or standard non-adjuvanted vaccination versus no intervention | 100%                                                                         | 0%                            | 63%                                      |
| Brydak et al (2012), [27]                   | Mixed risk aged ≥65 (50% high-risk)                                      | Poland                      | Reimbursed vaccination versus no intervention                                             | 40%                                                                          | 13.5%                         | 12%                                      |
| Lugner et al (2012), [28]                   | Mixed risk aged ≥65 (73-100% high-risk)                                  | Germany, Netherlands and UK | Vaccination versus no intervention                                                        | 90%                                                                          | 0%                            | 56% Germany<br>74% Netherlands<br>76% UK |
| Postma et al (1999), [29]                   | Mixed risk aged ≥65 (35% high-risk)                                      | Netherlands                 | Vaccination versus no intervention                                                        | 83% high risk<br>65% low-risk                                                | 68% high risk<br>27% low risk | 74%                                      |
| Scuffham                                    | Unknown                                                                  | England                     | Opportunistic                                                                             | 53%                                                                          | 0%                            | 76% UK                                   |

|                                                                                                                                                                                                                                                                                                                                                                                                                                                                                                      |                           |                               |                                                                                     |                                                            |  |                           |
|------------------------------------------------------------------------------------------------------------------------------------------------------------------------------------------------------------------------------------------------------------------------------------------------------------------------------------------------------------------------------------------------------------------------------------------------------------------------------------------------------|---------------------------|-------------------------------|-------------------------------------------------------------------------------------|------------------------------------------------------------|--|---------------------------|
| & West (2002), [30]                                                                                                                                                                                                                                                                                                                                                                                                                                                                                  | risk aged $\geq 65$ or 60 | and Wales, France and Germany | vaccination versus no vaccination, comprehensive vaccination versus no intervention | opportunistic vaccination 65-75% comprehensive vaccination |  | 53% France<br>56% Germany |
| <p><b>Note:</b> high-risk refers to the elderly population with another condition or circumstance that places them at a greater risk of complications, e.g. respiratory conditions. Low-risk refers to the elderly population, who aside from being older, would not be considered to fall into any high-risk categories.</p> <p><sup>a</sup> Note that the study by Baio et al (2006) directly compared vaccination types, as well as comparing both vaccination types to no vaccination, [23].</p> |                           |                               |                                                                                     |                                                            |  |                           |

For peer review only

Table 2: Study design and headline results

| Authors                                     | Study design                                                                                                                                       | Evaluation details                                                                                                                                                                                                                                        | Data source/s                                                                                                                                                                                                                                                                           |
|---------------------------------------------|----------------------------------------------------------------------------------------------------------------------------------------------------|-----------------------------------------------------------------------------------------------------------------------------------------------------------------------------------------------------------------------------------------------------------|-----------------------------------------------------------------------------------------------------------------------------------------------------------------------------------------------------------------------------------------------------------------------------------------|
| <b>Comparison of vaccination types</b>      |                                                                                                                                                    |                                                                                                                                                                                                                                                           |                                                                                                                                                                                                                                                                                         |
| Baio et al (2006), [23] <sup>a</sup>        | <ul style="list-style-type: none"> <li>Evaluation type: CEA</li> <li>Measure of health benefit: deaths averted</li> </ul>                          | <ul style="list-style-type: none"> <li>Type of study: model based economic evaluation (Bayesian network model)</li> <li>Perspective: healthcare provider</li> <li>Time horizon: NR</li> <li>Price year: NR</li> </ul>                                     | Observational study data from 4 GP databases over 3 flu seasons was used for efficacy. The remainder of the evidence sources are unclear (not specified).                                                                                                                               |
| Meier et al (2015), [24]                    | <ul style="list-style-type: none"> <li>Evaluation type: CEA and CUA</li> <li>Measure of health benefit: QALYs gained</li> </ul>                    | <ul style="list-style-type: none"> <li>Type of study: model based economic evaluation (Markov model)</li> <li>Perspective: healthcare provider (societal as a secondary analysis)</li> <li>Time horizon: lifetime</li> <li>Price year: 2012/13</li> </ul> | National data sources were used for incidence, costs, utilities, complications and mortality data. Vaccine efficacy was taken from a published review of studies from multiple countries/influenza seasons. Over-the-counter medication usage was estimated from previous publications. |
| Piercy et al (2004), [25]                   | <ul style="list-style-type: none"> <li>Evaluation type: CEA</li> <li>Measure of health benefit: deaths averted and life-years gained</li> </ul>    | <ul style="list-style-type: none"> <li>Type of study: model based economic evaluation (decision tree)</li> <li>Perspective: healthcare provider</li> <li>Time horizon: lifetime</li> <li>Price year: NR</li> </ul>                                        | A variety of evidence sources were used, including national data, published literature and expert opinion. When French data could not be sourced (e.g. hospitalisations), data from other European countries was used.                                                                  |
| <b>Comparison of vaccination strategies</b> |                                                                                                                                                    |                                                                                                                                                                                                                                                           |                                                                                                                                                                                                                                                                                         |
| Allsup et al (2004), [26]                   | <ul style="list-style-type: none"> <li>Evaluation type: CEA and CUA</li> <li>Measure of health benefit: deaths averted and QALYs gained</li> </ul> | <ul style="list-style-type: none"> <li>Type of study: RCT based economic evaluation</li> <li>Perspective: healthcare provider</li> <li>Time horizon: lifetime</li> <li>Price year: NR</li> </ul>                                                          | The main source of data was a prospective, single-blind, randomised, placebo-controlled clinical trial. Some parameters (e.g. baseline hospitalisation rate) were supplemented with hospital data and/or clinician expert assumptions.                                                  |

|                                                                                                                                                                                                                                                                                                                                                                                           |                                                                                                                                                                   |                                                                                                                                                                                                                                                        |                                                                                                                                                                                                                                                                                                                              |
|-------------------------------------------------------------------------------------------------------------------------------------------------------------------------------------------------------------------------------------------------------------------------------------------------------------------------------------------------------------------------------------------|-------------------------------------------------------------------------------------------------------------------------------------------------------------------|--------------------------------------------------------------------------------------------------------------------------------------------------------------------------------------------------------------------------------------------------------|------------------------------------------------------------------------------------------------------------------------------------------------------------------------------------------------------------------------------------------------------------------------------------------------------------------------------|
| Brydak et al (2012), [27]                                                                                                                                                                                                                                                                                                                                                                 | <ul style="list-style-type: none"> <li>• Evaluation type: CUA</li> <li>• Measure of health benefit: deaths averted, life-years gained and QALYs gained</li> </ul> | <ul style="list-style-type: none"> <li>• Type of study: model based economic evaluation (decision tree)</li> <li>• Perspective: healthcare provider</li> <li>• Time horizon: lifetime</li> <li>• Price year: 2009</li> </ul>                           | Published data specific to Poland was used to inform the model where possible. It was noted that in some cases Polish data was not available and US data had to be used (e.g. hospitalisations).                                                                                                                             |
| Lugner et al (2012), [28]                                                                                                                                                                                                                                                                                                                                                                 | <ul style="list-style-type: none"> <li>• Evaluation type: CUA</li> <li>• Measure of health benefit: QALYs gained</li> </ul>                                       | <ul style="list-style-type: none"> <li>• Type of study: model based economic evaluation (dynamic transmission model)</li> <li>• Perspective: healthcare provider and societal</li> <li>• Time horizon: lifetime</li> <li>• Price year: 2008</li> </ul> | National data sources were used for demographic, resource use and cost data. Where evidence was not available for Germany and the UK, data from the Netherlands was used (e.g. hospitalisations). Vaccine efficacy was taken from a published review and meta-analysis of studies from multiple countries/influenza seasons. |
| Postma et al (1999), [29]                                                                                                                                                                                                                                                                                                                                                                 | <ul style="list-style-type: none"> <li>• Evaluation type: CEA</li> <li>• Measure of health benefit: life years gained</li> </ul>                                  | <ul style="list-style-type: none"> <li>• Type of study: model based economic evaluation (decision tree)</li> <li>• Perspective: healthcare provider</li> <li>• Time horizon: lifetime</li> <li>• Price year: 1995</li> </ul>                           | National data and published literature from the Netherlands were used for parameter values. Vaccine efficacy was taken from a published review and meta-analysis of studies from multiple countries/influenza seasons.                                                                                                       |
| Scuffham & West (2002), [30]                                                                                                                                                                                                                                                                                                                                                              | <ul style="list-style-type: none"> <li>• Evaluation type: CEA</li> <li>• Measure of health benefit: life years gained and morbidity days saved</li> </ul>         | <ul style="list-style-type: none"> <li>• Type of study: model based economic evaluation (decision tree)</li> <li>• Perspective: healthcare provider</li> <li>• Time horizon: lifetime</li> <li>• Price year: 2000</li> </ul>                           | Evidence sources included published studies, national databases and expert opinion. In some cases country specific data were not available for all parameters and it was taken from another country in the study (e.g. vaccine efficacy came from a US study).                                                               |
| <p><b>Key:</b> CEA, cost-effectiveness analysis; CUA, cost-utility analysis; ICER, incremental cost-effectiveness ratio; NR, not reported; QALY, quality-adjusted life-year; RCT, randomised controlled trial.</p> <p><sup>a</sup> Note that the study by Baio et al (2006) directly compared vaccination types, as well as comparing both vaccination types to no vaccination, [23].</p> |                                                                                                                                                                   |                                                                                                                                                                                                                                                        |                                                                                                                                                                                                                                                                                                                              |

## Study results

Key study outcomes are given in Table 3.

Table 3: Key study outputs

| Study                                       | Population                          | Intervention and comparator                                               | Net health benefits (per patient) <sup>a</sup>                     | Net costs (per patient) | Incremental cost-effectiveness ratio*                                                    | Headline results                                                                                          |
|---------------------------------------------|-------------------------------------|---------------------------------------------------------------------------|--------------------------------------------------------------------|-------------------------|------------------------------------------------------------------------------------------|-----------------------------------------------------------------------------------------------------------|
| <b>Comparison of vaccination types</b>      |                                     |                                                                           |                                                                    |                         |                                                                                          |                                                                                                           |
| Baio et al (2006), [23] <sup>c</sup>        | Unknown risk aged ≥65               | Adjuvanted vaccination versus standard vaccination                        | NR                                                                 | -€1.95                  | Adjuvanted vaccine dominated standard vaccination (per death averted)                    | Adjuvanted vaccine was shown to be cost-effective against the standard vaccine.                           |
| Meier et al (2015), [24]                    | Mixed risk aged ≥65 (48% high-risk) | Quadrivalent influenza vaccination versus trivalent influenza vaccination | NR                                                                 | NR                      | €11,751 per QALY                                                                         | Quadrivalent vaccination is cost-effective compared with trivalent vaccination in the UK.                 |
| Piercy et al (2004), [25]                   | High-risk elderly people aged ≥65   | Adjuvanted vaccination versus standard vaccination                        | 0.003397 fewer ILI cases, 0.000043 deaths avoided and 0.000300 LYG | €1.31                   | €30,503 per death avoided and €6,131 per LYG                                             | Results were mixed according to the different scenarios for the strain of the influenza virus considered. |
| <b>Comparison of vaccination strategies</b> |                                     |                                                                           |                                                                    |                         |                                                                                          |                                                                                                           |
| Allsup et al (2004), [26]                   | Low-risk aged 65-74                 | Vaccination versus no intervention                                        | 0.000007 fewer deaths and 0.000044 additional QALYs                | € 5.37 <sup>b</sup>     | €3,576,908 per death avoided, €459,350 per life-year gained and €572,305 per QALY gained | Influenza vaccination was judged not to be cost-effective in the low-risk elderly population.             |
| Baio et al (2006), [23] <sup>c</sup>        | Unknown risk aged ≥65               | Adjuvanted vaccination versus no intervention                             | NR                                                                 | -€3.76                  | Adjuvanted vaccine dominated no intervention (per death averted)                         | Both vaccination types were cost-effective against no intervention.                                       |
|                                             |                                     | Standard vaccination versus no intervention                               | NR                                                                 | -€1.91                  | Standard vaccine dominated no intervention (per death averted)                           |                                                                                                           |

|                                |                                                         |                                                            |                                                |        |                                                                                                 |                                                                                                                                                                                                                                                                        |
|--------------------------------|---------------------------------------------------------|------------------------------------------------------------|------------------------------------------------|--------|-------------------------------------------------------------------------------------------------|------------------------------------------------------------------------------------------------------------------------------------------------------------------------------------------------------------------------------------------------------------------------|
| Brydak et al (2012), [27]      | Mixed risk aged $\geq 65$ (50% high-risk)               | Reimbursed vaccination versus no intervention              | NR                                             | €22.61 | €11,790 per QALY gained, €58,981 cost per death avoided and €6,881 per life-year gained         | Introducing public funding of influenza vaccination for people aged 65 and over to increase coverage was cost-effective compared to the status quo.                                                                                                                    |
| Lugner et al (2012), [28]      | Mixed risk aged $\geq 65$ (73-100% high-risk)           | Vaccination versus no intervention (Germany)               | NR                                             | €13.22 | €1,065 per QALY gained (direct costs) and dominant per QALY gained (indirect costs included)    | In general, vaccination was shown to be a cost-effective strategy. Early vaccination strategies are more favourable with lower total costs and cost per QALY gained. The inclusion of indirect costs makes the early vaccination strategies dominant in all countries. |
|                                |                                                         | Vaccination versus no intervention (UK)                    | NR                                             | €17.19 | €4,621 per QALY gained (direct costs) and dominant per QALY gained (indirect costs included)    |                                                                                                                                                                                                                                                                        |
|                                |                                                         | Vaccination versus no intervention (Netherlands)           | NR                                             | €17.62 | €1,338 per QALY gained (direct costs) and dominant per QALY gained (indirect costs included)    |                                                                                                                                                                                                                                                                        |
| Postma et al (1999), [29]      | Mixed risk aged $\geq 65$ (35% high-risk)               | Vaccination versus no intervention                         | NR                                             | NR     | €2,468 per LYG (all elderly people), €9,355 per LYG (low-risk) and dominant per LYG (high-risk) | Population-wide influenza vaccination for elderly people was found to be cost-effective. More favourable results were estimated in the high-risk population.                                                                                                           |
| Scuffham and West (2002), [30] | Unknown risk aged $\geq 65$ or 60 (country differences) | Opportunistic vaccination versus no intervention (England) | 0.547400 fewer morbidity days and 0.001040 LYG | -€1.89 | Dominated per LYG gained                                                                        | Vaccination strategies were cost-effective versus no intervention.                                                                                                                                                                                                     |
|                                |                                                         | Comprehensive vaccination versus no intervention (England) | 1.065400 fewer morbidity days and 0.002020 LYG | -€0.84 | Dominated per LYG                                                                               |                                                                                                                                                                                                                                                                        |
|                                |                                                         | Opportunistic vaccination versus no intervention (France)  | 0.822500 fewer morbidity days and 0.001470 LYG | €2.11  | €1,437 per LYG                                                                                  |                                                                                                                                                                                                                                                                        |



|                                                                                                                                                                                                                                                                                                                                                                                                                                                                                                                                                                                                                                                                                                                                                                                   |  |                                                            |                                                |       |                |  |
|-----------------------------------------------------------------------------------------------------------------------------------------------------------------------------------------------------------------------------------------------------------------------------------------------------------------------------------------------------------------------------------------------------------------------------------------------------------------------------------------------------------------------------------------------------------------------------------------------------------------------------------------------------------------------------------------------------------------------------------------------------------------------------------|--|------------------------------------------------------------|------------------------------------------------|-------|----------------|--|
|                                                                                                                                                                                                                                                                                                                                                                                                                                                                                                                                                                                                                                                                                                                                                                                   |  | Comprehensive vaccination versus no intervention (France)  | 1.011300 fewer morbidity days and 0.001800 LYG | €6.53 | €3,623 per LYG |  |
|                                                                                                                                                                                                                                                                                                                                                                                                                                                                                                                                                                                                                                                                                                                                                                                   |  | Opportunistic vaccination versus no intervention (Germany) | 0.479500 fewer morbidity days and 0.000780 LYG | €2.87 | €3,676 per LYG |  |
|                                                                                                                                                                                                                                                                                                                                                                                                                                                                                                                                                                                                                                                                                                                                                                                   |  | Comprehensive vaccination versus no intervention (Germany) | 0.760200 fewer morbidity days and 0.001240 LYG | €8.69 | €7,016 per LYG |  |
| <p><b>Key:</b> ICER, incremental cost-effectiveness ratio; LYG, life-years gained; NR, not reported; QALY, quality-adjusted life-year.</p> <p><sup>a</sup> Note that net benefit per person was calculated by the author where the total net benefits across the population and total population figures were provided by studies. This may mean that there appear to be differences between the ICER value calculated by the study and the value calculated using the net benefit above, likely due to rounding differences.</p> <p><sup>b</sup> Trial cost only reported (not actual modelled costs).</p> <p><sup>c</sup> Note that the study by Baio et al (2006) directly compared vaccination types, as well as comparing both vaccination types to no vaccination [23].</p> |  |                                                            |                                                |       |                |  |

### Vaccination type comparisons

Three studies including two vaccine types, [23–25]. Adjuvanted vaccination, whilst associated with a higher cost of vaccination, was cost effective when compared to standard vaccination as higher efficacy rates increased health benefits, [23,25]. Though the two studies focusing on adjuvanted vaccination identified it as being cost-effective, the ICER results were very different (dominant versus a cost per QALY gain). It is difficult to assess where the difference in the result arose from, due to a lack of reporting incremental health benefits and net costs. However, there were some key differences in the studies that could have affected this, including; modelling characteristics (decision tree versus Bayesian network model), the population risk level, sources of effectiveness evidence and in particular the influenza attack rate. The latter in particular stands out as being very different between studies; Piercy et al (2004) assumed a rate of 5% (author's assumptions) whereas Baio et al (2006) used estimates from the literature, with a mean of 16%, [23,25].

Quadrivalent vaccination was cost-effective when compared to trivalent vaccination in the base case scenario modelled by Meier et al (2015), [24]. However, this study does not make it clear whether the data used to inform efficacy of the vaccination for the base case results was specific to the elderly. The study also considered two scenarios (a best-matching season and a worst-matching season) but did not report the results separately for the elderly population.

Two studies which compared vaccination types included probabilistic sensitivity analysis. Baio et al (2006) estimated that adjuvanted vaccination was over 90% likely to be cost-effective compared to standard vaccination, [23]. Meier et al (2015) included probabilistic sensitivity analysis, [24]. The authors found that quadrivalent vaccination was estimated to be cost-effective in between 68% to 87% of scenarios compared to trivalent across the total modelled population. However, this was not restricted to the elderly population sub-group thus it is impossible to draw conclusions from this study about the uncertainty around estimates that are specific to the elderly population.

### Vaccination strategy comparisons

Vaccination intervention (i.e. strategies that increase the level of vaccination within a population) appears to be cost effective throughout the studies for both the primary and sensitivity analyses conducted, with the exception of Allsup et al study (2004) which reported a significantly higher ICER, [26]. As previously noted, studies included different levels of vaccination in their intervention/comparator arms, however this does not appear to cause any systematic differences in results.

Allsup et al (2004) is noted to have significantly different results to the other studies. This study focused on the low-risk population only. In addition, it applied lower reductions in the risk of

1  
2  
3 hospitalisation from vaccination and lower costs of hospitalisations. It also applied a cost of  
4 vaccination promotion where the other studies did not, increasing the validity of costs as this is likely  
5 to be needed to reach high vaccination levels. This was also the only study completed alongside a  
6 randomised controlled trial (RCT); the remainder were economic models using secondary data  
7 sources. Studies conducted within RCT have high internal validity and this study appeared to be  
8 robust and was overall well-reported. However, Jit et al (2013) noted that there are some issues when  
9 relying on one single trial for an economic evaluation has problems, [31]. In particular, a lack of  
10 external validity as the vaccine efficacy changes each season, it is possible that the study was  
11 conducted in a season in which vaccine matching was poor, [31].  
12  
13  
14  
15

16  
17 The susceptibility of the population has important implications for the rate of complications; if more  
18 people are at risk of complications, vaccination is likely to produce larger health gains. One study  
19 compared results between the low and high-risk population, [29]. As expected, the vaccination of  
20 high-risk individuals was demonstrated to be more cost effective than vaccinating low-risk  
21 individuals, as this population is more susceptible to complications, which are costly and negatively  
22 impact quality of life, [29]. This trend seems to be reflected in the other studies identified, for  
23 example with Brydak et al (2012) and Lugner et al (2012), as the latter has a greater proportion of  
24 high-risk individuals has a more favourable ICER per QALY gained (in the same countries), [27,28].  
25  
26  
27  
28  
29

30 A passive vaccination strategy was found to be more cost effective compared to no intervention than a  
31 comprehensive/targeted strategy, [30]. Comprehensive strategies are associated with greater health  
32 benefits but the passive strategy has reduced costs as they avoids the additional consultation costs,  
33 only vaccinating when people present at the GP for other reasons.  
34  
35

36  
37 One model included transmission rates and captured externalities arising from herd immunity, [28].  
38 When these indirect effects were included results became more favourable (from an ICER that was  
39 judged to be below cost-effective thresholds to dominant), as it demonstrated cost savings. The  
40 inclusion of herd immunity has important implications for the vaccination coverage in the  
41 intervention and comparator arm. Herd immunity means that the impact of increasing vaccination  
42 levels is not linear, e.g. an equal change in the coverage rate between studies could have very different  
43 results depending on what the comparator/usual care coverage rate is, as the scope for benefits from  
44 herd immunity will be different. Whilst this does not affect this review because only one study  
45 included herd immunity, it is an important point for future researchers looking to compare study  
46 results as more studies including herd immunity become available in the future.  
47  
48  
49  
50  
51

52 It would be expected that different countries have comparatively different cost-effectiveness results,  
53 due to differences in healthcare service design and population differences that may affect the attack  
54 rate and complication rates. However, there does not seem to be a clear pattern demonstrated across  
55  
56  
57  
58  
59  
60

1  
2  
3 the studies included. For example, three studies included the UK but results are very different; one  
4 found vaccination to be cost saving and more effective (dominant), another found it to be cost  
5 increasing but cost-effective, and another found it to be cost-increasing and not cost-effective,  
6 [26,28,30]. Some of this difference can be explained by assumptions made about the vaccination cost,  
7 and other study differences (e.g. susceptibility of the population). However, one key issue when  
8 interpreting results across countries is a lack of evidence specific to each population (discussed further  
9 in the critical appraisal section).

10  
11  
12  
13  
14 One study which compared vaccination to no intervention include probabilistic sensitivity analysis  
15 and determined that vaccination was 79.93% likely to be cost effective (below the threshold of 3 GDP  
16 per capita), [27]. Across all studies (irrespective of intervention and comparator) scenario and one-  
17 way sensitivity analysis demonstrated key variables to be the incidence of influenza, vaccine efficacy,  
18 discount rates and complication rates (mortality and hospitalisation). In general, studies showed that  
19 despite parameter uncertainty, the majority of tested scenarios still demonstrated vaccination to be  
20 cost effective. Further detail on sensitivity analysis conducted is provided in an overview table in the  
21 supplementary material.

### 22 23 24 25 26 27 **Critical appraisal**

28  
29 Studies were critically appraised to determine the overall quality of the evidence base; a summary is  
30 given in supplementary data. None of the studies reported all information required for data extraction,  
31 or to conform to the WHO guidelines or recommended checklists for economic evaluations, [19,32–  
32 34]. In some cases there was a failure to report fundamental assumptions, design and inputs, which  
33 means that the risk of bias is difficult to judge. In particular, it is difficult to assess the quality of the  
34 data used (and therefore the validity of study results), due to the lack of reporting around this,  
35 including how parameters were identified. These factors indicate uncertainty about the robustness of  
36 the overall result that vaccination is cost-effective.

### 37 38 39 40 41 42 **Intervention and comparator**

43  
44 Three studies directly compared two vaccine types and found that the cost effectiveness of  
45 vaccination varied by type of vaccine [23–25]. Six studies included a comparison of a strategy to  
46 vaccinate older people to no vaccination strategy [23,24,26–30]. Of these studies the comparator arm  
47 included a proportion of participants who would be vaccinated which ranged from 0-27% in low or  
48 mixed risk populations and 68% in a high risk population. The reported coverage rates for the  
49 countries included in the studies ranged from 12% to 76%. The data indicate that practice varies  
50 between countries and that the decision to implement or change a vaccination strategy for older  
51 people needs to take the underlying coverage rate into account. Two studies considered a vaccination  
52 level very similar to reality, improving the validity of these studies, [24,27]. One study included anti-  
53  
54  
55  
56  
57  
58  
59  
60

1  
2  
3 viral drugs as a comparator, but did not directly compare them to a vaccination intervention arm and  
4 so results are not presented, [30].  
5

6 Four studies, which synthesised evidence from multiple sources within an economic model, did not  
7 report vaccination type (e.g. adjuvant, quadrivalent, etc.), [24,28–30]. As there are different  
8 vaccination types available it would be more robust if evaluations focused on a specific type, in these  
9 cases it is not known whether data may have been synthesised from studies for different vaccination  
10 types, reducing validity.  
11  
12  
13

#### 14 Effectiveness data 15

16 One study was conducted alongside a RCT, [26]. This was single-blinded only as double-blinding was  
17 not feasible due to the intervention type (injection), which may introduce bias. One study identified  
18 the efficacy inputs from prospective cohort studies which were not randomised or blinded to  
19 intervention, increasing the risk of bias [23]. The authors did not report detailed information about the  
20 cohort study design or participants so it is not possible to assess the validity and robustness of the data  
21 and analyses used in the economic model. The remaining studies synthesised data about vaccine  
22 efficacy/effectiveness from several sources. None of these economic evaluations reported the methods  
23 used to identify and select studies to estimate effectiveness data inputs. Most of the authors reported  
24 that they needed to supplement data on vaccine efficacy with evidence from other countries, or apply  
25 the same efficacy values across different countries in the same study, [24,25,27–30]. This means that  
26 it is not possible to assess the validity and robustness of the vaccine efficacy/effectiveness data used  
27 in the economic models. For example, Scuffham and West (2004) used the same efficacy source for 3  
28 countries and many of the papers use the same network meta-analysis for effectiveness of the  
29 influenza vaccination, [30]. This reduces the validity of study results and suggests that the studies  
30 may be over-representing a limited evidence base.  
31  
32  
33  
34  
35  
36  
37  
38  
39

#### 40 Measure of health benefit 41

42 Four studies undertook a cost-effectiveness analysis alone, with the measure of health benefit  
43 provided in terms of life years gained or deaths averted, [23,25,29,30], 2 studies performed a cost-  
44 utility analysis with quality-adjusted life-years (QALYs) as the measure of health benefit, [24,28], and  
45 2 studies included both cost-effectiveness and cost-utility analyses, [26,27]. All studies assessed life-  
46 years gained as a result of avoiding death related to influenza complications. In the 4 studies reporting  
47 cost-utility results, a single study accounted for morbidity by applying lost utility related to mortality  
48 to estimate QALYs, [26]. The other studies also accounted for short-term changes in utility as a result  
49 of having influenza, [24,27,28].  
50  
51  
52  
53  
54  
55  
56  
57  
58  
59  
60

1  
2  
3 The robustness of QALY estimates is questionable due to the limited relevant evidence and small  
4 study samples of utility studies. A review concluded that no utility studies using robust methods were  
5 available for influenza, which was reflected in the cost-utility evaluations identified, [35]. Lugner et al  
6 (2012) took utility decrements relating to influenza from an English postal survey of 288 patients with  
7 confirmed influenza, using the European Quality of life 5-dimension health questionnaire (EQ-5D),  
8 [28,36]. The generalisability of this study to the elderly Dutch population is difficult to assess as  
9 patient characteristics were not reported. Meier et al (2015) and Brydak et al (2012) applied utility  
10 values taken from a survey of 15 working age healthcare workers in the US with utilities scored using  
11 the health utilities index, [24,27,37]. This is arguably not relevant to the elderly population. The WHO  
12 guidelines recommend that economic evaluations are cost-utility analyses, however without robust  
13 utility data, cost-utility evaluations will inevitably have limited validity, [32].  
14  
15  
16  
17  
18  
19

20 ILI was used in all studies as a proxy for influenza. The severity and subsequent cost of influenza can  
21 vary substantially, therefore there are concerns that this outcome is too broad, [38]. However, this is  
22 the primary end-point of clinical trials and subsequently studies are restricted by this, [38]. Longer-  
23 term outcomes associated with influenza were not considered; likely due to a lack of robust clinical  
24 data and the impact of confounding factors in the long-term, [11]. The likely direction of bias caused  
25 by excluding long-term outcomes is unclear, it may understate the value of vaccination if it increases  
26 a person's health over time, or may overstate the value of vaccination if side effects occur in the long-  
27 term.  
28  
29  
30  
31

### 32 Costs

33  
34  
35 Seven out of 8 studies used a one year time horizon for costs, consistent with an influenza season and  
36 the short-term/immediate associated costs, therefore discounting costs was irrelevant, [23,25–30]. The  
37 remaining study considered repeat vaccinations and costs each flu season over a lifetime, [24]. Where  
38 relevant, studies applied country-specific guidelines for discounting outcomes; ranging from 1.5% to  
39 5% annually.  
40  
41  
42

43 The majority of studies considered direct costs only. This approach is justified as indirect costs are  
44 less important in a retired population. Societal costs (e.g. over-the-counter drugs) are likely to be  
45 minimal due to the nature of the illness. Appropriately, the only study that included productivity  
46 losses did so because they considered herd immunity effects in the working age population, the study  
47 also included a scenario in which only direct costs were considered, [28]. All studies included costs  
48 associated with purchasing vaccines, influenza related treatments, primary care visits and  
49 hospitalisations. Six studies included administration costs, [25–30]. The total cost of vaccination  
50 varied from €8.50 to €35.95 per person, differences between studies mainly occurred due to variation  
51 in administration costs rather than variation in vaccine cost; lower costs were associated with  
52 opportunistic vaccination. Transportation costs, over-the-counter medication costs and private nursing  
53  
54  
55  
56  
57  
58  
59  
60

1  
2  
3 home costs were considered in the societal perspective of one study, [24]. A single study included  
4 vaccination side effect costs; in the short-term these are rare and usually require only minimal medical  
5 attention, [30]. The inclusion of side effect costs did not have a significant effect on total costs or  
6 overall ICER results in this study (supported by a sensitivity analysis), [30]. Longer-term evidence is  
7 lacking, with the majority of studies in the elderly population having short time-horizons, hence data  
8 on longer-term side effects would not be identified and could not have been included by studies, in the  
9 future if studies expand their time horizons this may have implications on results, [1,11]. Only 1 study  
10 applied costs to promote vaccination, [26]. No studies considered the cost of service redesign to  
11 increase vaccination (e.g. opening additional clinics) which may be relevant for healthcare systems  
12 with restraints on resources available (e.g. in the case of an aging population). Thus, the true cost of  
13 vaccination is likely to be underestimated across studies depending on the healthcare setting.  
14  
15  
16  
17  
18

### 19 Model design

20  
21  
22 On the whole, modelling approaches were relatively simple (e.g. static decision tree models),  
23 reflecting gaps in the evidence base and the short time horizon captured in effectiveness studies. As  
24 the main outcomes of the vaccination occur over a single influenza season and occur once only during  
25 this time (i.e. influenza infection or no infection), decision trees are a clear and logical structure for  
26 the model and are likely to be sufficient to capture the majority of health outcomes and costs. One  
27 study used a dynamic transmission model and was therefore able to capture the impact of  
28 transmission and herd immunity, [28]. This characterises interactions across the population and is  
29 therefore more reflective of the spread of disease and the indirect benefit for those not vaccinated.  
30 Overall, this model was reported well and seemed to be robust, but it did require more data than the  
31 simpler model approaches. The authors in this case had access to data on population interactions, but  
32 this may not be available in every country. Models that exclude herd immunity are likely to  
33 underestimate the cost-effectiveness of influenza vaccination, however, WHO guidelines recommend  
34 that a static model is acceptable as a conservative approach, [32].  
35  
36  
37  
38  
39  
40  
41

42 More complex methodologies may capture the nature of the disease more accurately, however given  
43 the noted lack of clinical evidence it is unlikely that the current evidence base is sufficient to inform  
44 these, [11]. For example, patient-level simulations can also be more precise when modelling  
45 population interactions, [39]. Additionally stochastic models, with events occurring randomly, can  
46 more realistically model epidemics, as these occur by chance of transmission amongst population  
47 interactions, [20].  
48  
49  
50

### 51 Methods to address uncertainty

52  
53  
54 Most scenarios tested in sensitivity analysis still resulted in favourable cost-effectiveness results for  
55 influenza vaccination. However, there were limitations to the range of sensitivity analyses reported,  
56  
57  
58  
59  
60

1  
2  
3 given that many of the studies recognised there are issues with the evidence base. Methods used to  
4 analyse uncertainty were varied, such that results are not comparable. The WHO recommend that  
5 sensitivity analyses for economic evaluations of vaccines should vary the following 5 parameters as a  
6 minimum: discount rates, vaccine efficacy, influenza incidence, influenza complication rates and  
7 vaccine price, [32]. None of the studies identified varied all of the recommended parameters and  
8 because of this, we cannot fully assess the robustness of the results. One of the studies performed a  
9 comprehensive one-way sensitivity analysis; presenting a resulting tornado diagram, [27]. One study  
10 did not perform any one-way/scenario analysis, [23]. The remaining studies chose to vary a limited  
11 selection of key variables, but did not explain the rationale for these, [24–26,28–30]. Three studies  
12 provided and justified ranges used in sensitivity analyses, [24,25,27]. The remainder detailed the  
13 ranges but did not provide justification, which means that validity cannot be assessed, [26,28–30].  
14 Three studies included probabilistic sensitivity analysis, but one did not report the results restricted to  
15 the elderly population alone, [23,24,27]. This lack of thorough investigation and transparency  
16 restricts our ability to assess the robustness of the results or to explore the transferability of study  
17 results to alternative countries, settings and influenza seasons.  
18  
19  
20  
21  
22  
23  
24

## 25 26 **Discussion**

27 The majority (7/8) of the identified studies found influenza vaccination to be cost effective in an  
28 elderly European population. The studies indicated some differences what vaccination strategy may  
29 be cost-effective. Adjuvant or quadrivalent vaccinations had more favourable results compared to  
30 standard vaccinations. Vaccination targeted to high risk groups of older people were generally more  
31 cost-effective and passive vaccination strategies appeared more cost-effective than opportunistic  
32 strategies. Decision makers using this evidence would need to check which papers are most relevant  
33 to their research question.  
34  
35  
36  
37

38 Most scenarios tested in sensitivity analysis still resulted in favourable cost-effectiveness results for  
39 influenza vaccination. In addition, the studies that conducted probabilistic sensitivity analysis  
40 concluded that the likelihood of cost-effectiveness given parameter uncertainty was high. Results  
41 were sensitive to variations in the strain of influenza incidence, vaccination type, efficacy and  
42 strategy, population risk and modelling characteristics. Review findings are in alignment with the  
43 previous review identified, [40].  
44  
45  
46  
47

## 48 **Limitations of the evidence base**

49  
50 The robustness of conclusions about the cost effectiveness of vaccination in older people is limited  
51 due to the evidence gaps and subsequent uncertainty demonstrated in the literature base, as well as the  
52 limited investigation into this uncertainty. Studies did not report all of the information needed to  
53 assess the internal and external validity of results. Robust economic evaluations require high quality  
54  
55  
56  
57  
58  
59  
60



1  
2  
3 evidence of effectiveness, service use and health benefit. In the studies reviewed here, the data used is  
4 uncertain and in the case of the effectiveness data reliant on underpowered trials. Most of the studies  
5 reported limited information about the methods used to identify and select effectiveness data, the  
6 relevance of the data to the elderly population or the quality of the data used to estimate effectiveness  
7 parameters. In addition, the evidence base is small, especially considering the number of questions  
8 decision makers could have. Many of the conclusions about cost-effectiveness rely on the results of  
9 single studies, [24,30].

10  
11  
12  
13  
14 The studies reported limited sensitivity analyses to test the robustness of the conclusions to the  
15 assumptions made or uncertainty in the data used. There was also a lack of reporting on key items  
16 such as the rationale for the data ranges used in sensitivity analysis. Detailed and clearly justified  
17 sensitivity analysis with robust ranges is needed to identify the level of uncertainty and draw  
18 evidence based conclusions, [11]. Further investigation into uncertainty, in particular probabilistic  
19 sensitivity analysis that includes all parameters, is needed to estimate the level of certainty of the cost-  
20 effectiveness results.

#### 21 22 23 24 25 Limitations of this review

26  
27  
28 The review focused on the elderly population, which is one of many high-risk groups. To prioritise  
29 the right groups to target for vaccination, due to cost and resource constraints, decision makers are  
30 likely to need to conduct further reviews of the economic evidence for other high-risk groups. For  
31 example, these analyses might focus on groups with chronic conditions, pregnant women or children.  
32 This would produce a more balanced judgement of where to prioritise intervention.

33  
34  
35  
36 The original search for studies used a single database (NHS EED), increasing the chance of missing  
37 papers that could change the conclusions of the review. However, at the time NHS EED was  
38 comprehensive, searching a wide range of databases, and was regularly updated. The updated search  
39 included more databases. The review included English language articles only, which risks language  
40 bias. Searches were limited to published journal articles. Widening the searches to the grey literature  
41 or unpublished reports may have been more likely to identify studies with inconclusive or negative  
42 cost-effectiveness results, [41]. The generalisability of some of the results of this review to other  
43 settings (outside the EU) may be limited, due to inevitable differences resource use, treatment  
44 pathways and population characteristics.

#### 45 46 47 48 49 Future research

50  
51  
52 This review highlights several areas that would benefit from additional research. Parameter  
53 uncertainty affected the strength of economic evaluations, largely because many of the trials for  
54 vaccine efficacy are underpowered, non-randomised and susceptible to bias, [11], and deterministic  
55  
56  
57  
58  
59

1  
2  
3 scenarios were not explored in thorough scenario analyses. A number of the evaluations used the  
4 same effectiveness data to estimate model parameters; this will over-represent a limited evidence  
5 base. Without more and stronger quality data to inform parameters economic evaluations will always  
6 be subject to a high degree of uncertainty. Trials for the vaccination cover the influenza season,  
7 typically a 6-month period over winter, [11]. A predominance of short term evidence in the literature  
8 prevented the identified studies from including longer-term outcomes. There was also a lack of  
9 evidence for each country, with studies relying on external data sources with questionable relevance  
10 to their population. Moreover, this evidence gap meant that many studies used the same sources for  
11 certain inputs, potentially over-representing the results of a small and low quality evidence base.  
12 Work to ensure that robust country-relevant data inputs are available would increase the validity of  
13 future evaluations. Increasing this evidence base could lead policy makers to reevaluate current  
14 recommendations.  
15  
16  
17  
18  
19  
20

21 The body of economic evidence suggest that influenza vaccination of elderly populations may be cost  
22 effective, but data, methodological transparency and exploration of uncertainty are lacking. Baguelin  
23 et al developed a complex epidemiological model to explore the relative cost effectiveness of  
24 vaccination in different low and high risk groups, [36,42]. Whilst these evaluations give an indication  
25 of the value of complex models, both studies also faced limitations in data about the effectiveness of  
26 vaccines and estimates of service use and health benefits, [36,42].  
27  
28  
29  
30

31 Future economic evaluations should follow good practice guidelines and ensure that they are  
32 transparently reported to assist reviewers in the future. Economic evaluations integrated into long-  
33 term, prospective, controlled studies (e.g. observational cohort studies or RCTs) or prospective study  
34 in elderly populations would help to address the evidence gaps around effectiveness, service use and  
35 health benefit. Since the influenza virus mutates each season and differences in vaccine matching  
36 each season, a combination of multiple studies and those conducted over several influenza seasons are  
37 needed. Improvements in the evidence base would support the development and analysis of more  
38 sophisticated modelling techniques. Such models could then characterise the epidemiology of  
39 influenza and complications in elderly people, incorporate the impact of herd immunity within the  
40 elderly population and between age groups. Robust data about service use and health benefits would  
41 allow more detailed estimates of the potential for different vaccination strategies for older people to  
42 be cost-effective in different settings.  
43  
44  
45  
46  
47  
48  
49  
50  
51  
52  
53  
54  
55  
56  
57  
58  
59  
60

### **Contributors**

GE Shields and J Elvidge conducted the literature search with oversight from LM Davies. G Shields wrote the first draft of the manuscript, J Elvidge and LM Davies contributed to the final writing of the paper.

### **Acknowledgements**

The research was completed as part of a master's degree dissertation (Master of Public Health) at The University of Manchester. The authors would like to thank the reviewers of the original dissertation for their helpful comments and suggestions.

### **Competing interests**

All authors have completed the ICMJE uniform disclosure form at [www.icmje.org/coi\\_disclosure.pdf](http://www.icmje.org/coi_disclosure.pdf) and declare no support from any organisation for the submitted work, no financial relationships with any organisations that might have an interest in the submitted work in the previous three years and no other relationships or activities that could appear to have influenced the submitted work.

### **Funding**

This research received no specific grant from any funding agency in the public, commercial or not-for-profit sectors

### **Data Sharing**

No additional data available

## References

- 1 Szucs TD. Health economic research on vaccinations and immunisation practices--an introductory primer. *Vaccine* 2005;**23**:2095–103. doi:10.1016/j.vaccine.2005.01.064
- 2 World Health Organisation. Influenza (Seasonal). 2015. <http://www.who.int/mediacentre/factsheets/fs211/en/> (accessed 17 Nov2015).
- 3 Monto AS. Seasonal influenza and vaccination coverage. *Vaccine* 2010;**28 Suppl 4**:D33-44. doi:10.1016/j.vaccine.2010.08.027
- 4 Preaud E, Durand L, Macabeo B, *et al*. Annual public health and economic benefits of seasonal influenza vaccination: a European estimate. *BMC Public Health* 2014;**14**:813. doi:10.1186/1471-2458-14-813
- 5 Mauskopf J, Klesse M, Lee S, *et al*. The burden of influenza complications in different high-risk groups: a targeted literature review. *J Med Econ* 2013;**16**:264–77. doi:10.3111/13696998.2012.752376
- 6 Weiskopf D, Weinberger B, Grubeck-Loebenstien B. The aging of the immune system. *Transpl Int* 2009;**22**:1041–50. doi:10.1111/j.1432-2277.2009.00927.x
- 7 Meier CR, Napalkov PN, Wegmüller Y, *et al*. Population-Based Study on Incidence, Risk Factors, Clinical Complications and Drug Utilisation Associated with Influenza in the United Kingdom. *Eur J Clin Microbiol Infect Dis* 2000;**19**:834–42. doi:10.1007/s100960000376
- 8 Eurostat. Population age structure by major age groups, 2005 and 2015 (% of the total population). [http://ec.europa.eu/eurostat/statistics-explained/index.php/File:Population\\_age\\_structure\\_by\\_major\\_age\\_groups,\\_2005\\_and\\_2015\\_\(%25\\_of\\_the\\_total\\_population\)\\_YB16.png](http://ec.europa.eu/eurostat/statistics-explained/index.php/File:Population_age_structure_by_major_age_groups,_2005_and_2015_(%25_of_the_total_population)_YB16.png) (accessed 7 Dec2016).
- 9 Hardelid P, Pebody R, Andrews N. Mortality caused by influenza and respiratory syncytial virus by age group in England and Wales 1999-2010. *Influenza Other Respi Viruses* 2013;**7**:35–45. doi:10.1111/j.1750-2659.2012.00345.x
- 10 Simonsen L, Viboud C, Taylor R, *et al*. The Epidemiology of Influenza and Its Control. In: Rappuoli R, Del Giudice G, eds. *Influenza Vaccines for the Future SE - 2*. Springer Basel 2011. 27–54. doi:10.1007/978-3-0346-0279-2\_2
- 11 Jefferson T, Di Pietrantonj C, Al-Ansary LA, *et al*. Vaccines for preventing influenza in the elderly. *Cochrane database Syst Rev* 2010;CD004876. doi:10.1002/14651858.CD004876.pub3
- 12 The Council of the European Union. Council Recommendation of 22 December 2009 on seasonal influenza vaccination. 2009. [http://www.eph.org/IMG/pdf/Council\\_Reccomendation\\_on\\_seasonal\\_flu\\_vaccine.pdf](http://www.eph.org/IMG/pdf/Council_Reccomendation_on_seasonal_flu_vaccine.pdf) (accessed 20 Nov2015).
- 13 European Centre for Disease Prevention and Control. Seasonal influenza vaccination in Europe. Overview of vaccination recommendations and coverage rates in the EU Member States for the 2012–13 influenza season. 2015.
- 14 Osterholm MT, Kelley NS, Sommer A, *et al*. Efficacy and effectiveness of influenza vaccines: a systematic review and meta-analysis. *Lancet Infect Dis* 2012;**12**:36–44. doi:10.1016/S1473-3099(11)70295-X
- 15 Haq K, McElhaney JE. Immunosenescence: influenza vaccination and the elderly. *Curr Opin Immunol* 2014;**29**:38–42. doi:10.1016/j.coi.2014.03.008
- 16 Jefferson T, Rivetti D, Rivetti A, *et al*. Efficacy and effectiveness of influenza vaccines in elderly people: a systematic review. *Lancet (London, England)* 2005;**366**:1165–74. doi:10.1016/S0140-6736(05)67339-4

- 1  
2  
3 17 Nixon J, Stoykova B, Glanville J, *et al*. The U.K. NHS economic evaluation database.  
4 Economic issues in evaluations of health technology. *Int J Technol Assess Health Care*  
5 2000;**16**:731–42.<http://www.ncbi.nlm.nih.gov/pubmed/11028129> (accessed 17 Nov2015).
- 6  
7 18 Centre for Reviews and Dissemination. Search strategies. Univ. York.  
8 2014.<http://www.crd.york.ac.uk/crdweb/searchstrategies.asp> (accessed 21 Jul2016).
- 9  
10 19 Centre for Reviews and Dissemination. NHS Economic Evaluation Database (NHS EED)  
11 Handbook. 2007.<http://www.york.ac.uk/inst/crd/pdf/nhseed-handbook2007.pdf> (accessed 18  
12 Dec2015).
- 13  
14 20 Kim S-Y, Goldie SJ. Cost-effectiveness analyses of vaccination programmes : a focused  
15 review of modelling approaches. *Pharmacoeconomics* 2008;**26**:191–  
16 215.<http://www.ncbi.nlm.nih.gov/pubmed/18282015> (accessed 17 Nov2015).
- 17  
18 21 OECD. Prices - Inflation (CPI) - OECD Data. 2015.[https://data.oecd.org/price/inflation-](https://data.oecd.org/price/inflation-cpi.htm)  
19 [cpi.htm](https://data.oecd.org/price/inflation-cpi.htm) (accessed 18 Dec2015).
- 20  
21 22 OECD. Purchasing Power Parities (PPPs) Data. 2015.[http://www.oecd.org/std/prices-](http://www.oecd.org/std/prices-ppp/purchasingpowerparitiespppsdata.htm)  
22 [ppp/purchasingpowerparitiespppsdata.htm](http://www.oecd.org/std/prices-ppp/purchasingpowerparitiespppsdata.htm) (accessed 18 Dec2015).
- 23  
24 23 Baio G, Pammolli F, Baldo V, *et al*. Object-oriented influence diagram for cost-effectiveness  
25 analysis of influenza vaccination in the Italian elderly population. *Expert Rev Pharmacoecon*  
26 *Outcomes Res* 2006;**6**:293–301. doi:10.1586/14737167.6.3.293
- 27  
28 24 Meier G, Gregg M, Poulsen Nautrup B. Cost-effectiveness analysis of quadrivalent influenza  
29 vaccination in at-risk adults and the elderly: an updated analysis in the U.K. *J Med Econ*  
30 2015;**18**:746–61. doi:10.3111/13696998.2015.1044456
- 31  
32 25 Piercy J, Ryan J, Megas F. Economic evaluation of MF59 adjuvanted vaccine against  
33 influenza in the high-risk elderly population in France. *J Med Econ* Published Online First: 2  
34 December 2008.<http://www.tandfonline.com/doi/abs/10.3111/200407001018#.VktWiXbhDIU>  
35 (accessed 17 Nov2015).
- 36  
37 26 Allsup S, Haycox A, Regan M, *et al*. Is influenza vaccination cost effective for healthy people  
38 between ages 65 and 74 years? A randomised controlled trial. *Vaccine* 2004;**23**:639–45.  
39 doi:10.1016/j.vaccine.2004.07.008
- 40  
41 27 Brydak L, Roiz J, Faivre P, *et al*. Implementing an influenza vaccination programme for adults  
42 aged  $\geq 65$  years in Poland: a cost-effectiveness analysis. *Clin Drug Investig* 2012;**32**:73–85.  
43 doi:10.2165/11594030-000000000-00000
- 44  
45 28 Lugnér AK, van Boven M, de Vries R, *et al*. Cost effectiveness of vaccination against  
46 pandemic influenza in European countries: mathematical modelling analysis. *BMJ*  
47 2012;**345**:e4445. doi:10.1136/bmj.e4445
- 48  
49 29 Postma MJ, Bos JM, van Gennep M, *et al*. Economic evaluation of influenza vaccination.  
50 Assessment for The Netherlands. *Pharmacoeconomics* 1999;**16 Suppl 1**:33–  
51 40.<http://www.ncbi.nlm.nih.gov/pubmed/10623374> (accessed 17 Nov2015).
- 52  
53 30 Scuffham PA, West PA. Economic evaluation of strategies for the control and management of  
54 influenza in Europe. *Vaccine* 2002;**20**:2562–  
55 78.<http://www.ncbi.nlm.nih.gov/pubmed/12057614> (accessed 17 Nov2015).
- 56  
57 31 Jit M, Newall AT, Beutels P. Key issues for estimating the impact and cost-effectiveness of  
58 seasonal influenza vaccination strategies. *Hum Vaccin Immunother* 2013;**9**:834–40.  
59 doi:10.4161/hv.23637
- 60  
61 32 Walker DG, Hutubessy R, Beutels P. WHO Guide for standardisation of economic evaluations  
62 of immunization programmes. *Vaccine* 2010;**28**:2356–9. doi:10.1016/j.vaccine.2009.06.035
- 63  
64 33 Drummond MF, Jefferson TO. Guidelines for authors and peer reviewers of economic

- 1  
2  
3 submissions to the BMJ. The BMJ Economic Evaluation Working Party. *BMJ* 1996;**313**:275–  
4 83.[http://www.pubmedcentral.nih.gov/articlerender.fcgi?artid=2351717&tool=pmcentrez&ren](http://www.pubmedcentral.nih.gov/articlerender.fcgi?artid=2351717&tool=pmcentrez&rendertype=abstract)  
5 [dertype=abstract](http://www.pubmedcentral.nih.gov/articlerender.fcgi?artid=2351717&tool=pmcentrez&rendertype=abstract) (accessed 13 Nov2015).
- 6  
7 34 Philips Z, Ginnelly L, Sculpher M, *et al.* Review of guidelines for good practice in decision-  
8 analytic modelling in health technology assessment. *Health Technol Assess* 2004;**8**:iii–iv, ix–  
9 xi, 1-158.<http://www.ncbi.nlm.nih.gov/pubmed/15361314> (accessed 27 Oct2015).
- 10  
11 35 van Hoek AJ, Underwood A, Jit M, *et al.* The impact of pandemic influenza H1N1 on health-  
12 related quality of life: a prospective population-based study. *PLoS One* 2011;**6**:e17030.  
13 doi:10.1371/journal.pone.0017030
- 14  
15 36 Baguelin M, Hoek AJ Van, Jit M, *et al.* Vaccination against pandemic influenza A/H1N1v in  
16 England: a real-time economic evaluation. *Vaccine* 2010;**28**:2370–84.  
17 doi:10.1016/j.vaccine.2010.01.002
- 18  
19 37 Rothberg MB, He S, Rose DN. Management of influenza symptoms in healthy adults. *J Gen*  
20 *Intern Med* 2003;**18**:808–  
21 15.[http://www.pubmedcentral.nih.gov/articlerender.fcgi?artid=1494927&tool=pmcentrez&ren](http://www.pubmedcentral.nih.gov/articlerender.fcgi?artid=1494927&tool=pmcentrez&rendertype=abstract)  
22 [dertype=abstract](http://www.pubmedcentral.nih.gov/articlerender.fcgi?artid=1494927&tool=pmcentrez&rendertype=abstract) (accessed 17 Nov2015).
- 23  
24 38 World Health Organisation. World Health Organization. Global epidemiological surveillance  
25 standards for influenza.  
26 2013.[http://www.who.int/influenza/resources/documents/WHO\\_Epidemiological\\_Influenza\\_S](http://www.who.int/influenza/resources/documents/WHO_Epidemiological_Influenza_Surveillance_Standards_2014.pdf?ua=1)  
27 [urveillance\\_Standards\\_2014.pdf?ua=1](http://www.who.int/influenza/resources/documents/WHO_Epidemiological_Influenza_Surveillance_Standards_2014.pdf?ua=1) (accessed 7 Jan2016).
- 28  
29 39 Davis S, Stevenson M, Tappenden P, *et al.* NICE DSU TECHNICAL SUPPORT  
30 DOCUMENT 15: COST-EFFECTIVENESS MODELLING USING PATIENT-LEVEL  
31 SIMULATION. Rep. BY Decis. Support UNIT.  
32 2014.[http://www.nicedsu.org.uk/TSD15\\_Patient-level\\_simulation.pdf](http://www.nicedsu.org.uk/TSD15_Patient-level_simulation.pdf) (accessed 7 Jan2016).
- 33  
34 40 Postma MJ, Baltussen RP, Palache AM, *et al.* Further evidence for favorable cost-  
35 effectiveness of elderly influenza vaccination. *Expert Rev Pharmacoecon Outcomes Res*  
36 2006;**6**:215–27. doi:10.1586/14737167.6.2.215
- 37  
38 41 Bell CM, Urbach DR, Ray JG, *et al.* Bias in published cost effectiveness studies: systematic  
39 review. *BMJ* 2006;**332**.
- 40  
41 42 Baguelin M, Camacho A, Flasche S, *et al.* Extending the elderly- and risk-group programme  
42 of vaccination against seasonal influenza in England and Wales: a cost-effectiveness study.  
43 *BMC Med* 2015;**13**:236. doi:10.1186/s12916-015-0452-y  
44  
45  
46  
47  
48  
49  
50  
51  
52  
53  
54  
55  
56  
57  
58  
59  
60

1  
2  
3  
4  
5  
6  
7  
8  
9  
10  
11  
12  
13  
14  
15  
16  
17  
18  
19  
20  
21  
22  
23  
24  
25  
26  
27  
28  
29  
30  
31  
32  
33  
34  
35  
36  
37  
38  
39  
40  
41  
42  
43  
44  
45  
46  
47  
48  
49  
50  
51  
52  
53  
54  
55  
56  
57  
58  
59  
60

For peer review only

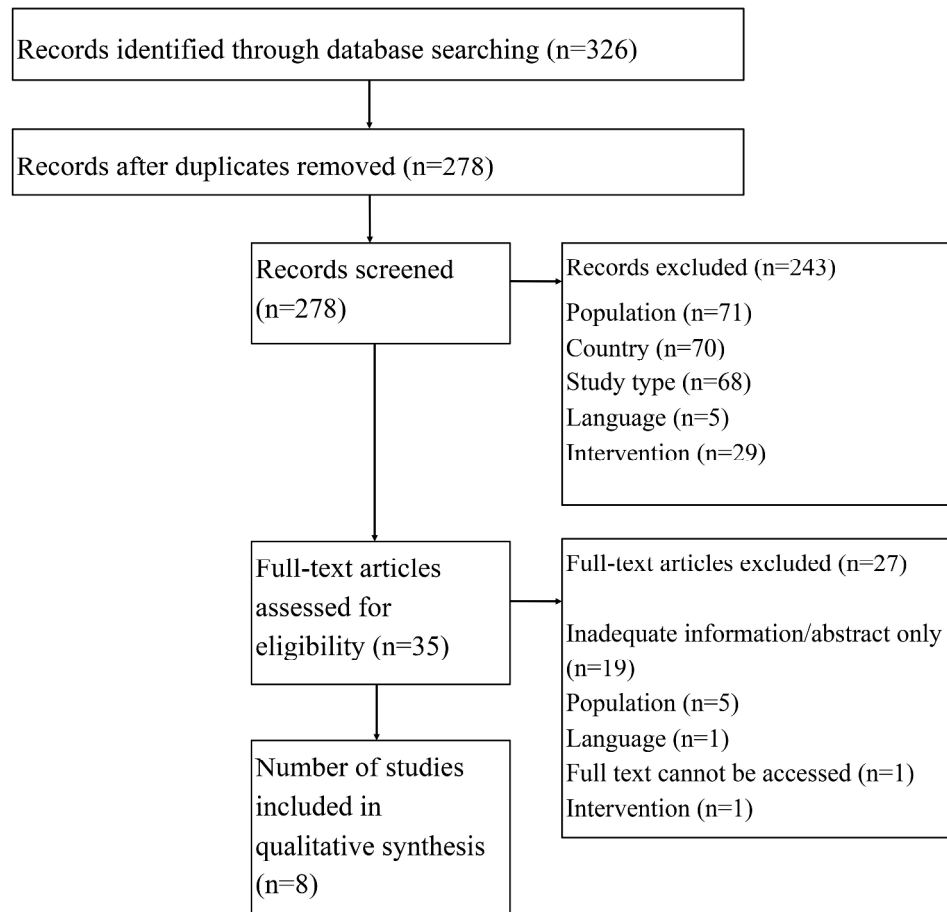

Figure 1: flow diagram of search

333x333mm (300 x 300 DPI)



## Supplementary material

### Example search strategy

1 Influenza, Human/  
2 influenza/  
3 flu/  
4 influenza virus/  
5 seasonal flu/  
6 1 or 2 or 3 or 4 or 5  
7 Vaccination/  
8 vaccine/  
9 7 or 8  
10 Economics/  
11 exp "costs and cost analysis"/  
12 Economics, Dental/  
13 exp economics, hospital/  
14 Economics, Medical/  
15 Economics, Nursing/  
16 Economics, Pharmaceutical/  
17 (economic\$ or cost or costs or costly or costing or price or prices or pricing or  
18 pharmaco-economic\$.ti,ab.  
19 (expenditure\$ not energy).ti,ab.  
20 value for money.ti,ab.  
21 budget\$.ti,ab.  
22 10 or 11 or 12 or 13 or 14 or 15 or 16 or 17 or 18 or 19 or 20  
23 ((energy or oxygen) adj cost).ti,ab.  
24 (metabolic adj cost).ti,ab.  
25 ((energy or oxygen) adj expenditure).ti,ab.  
26 22 or 23 or 24  
27 6 and 9 and 21  
28 26 not 25  
29 letter.pt.  
30 editorial.pt.  
31 historical article.pt.  
32 28 or 29 or 30  
33 27 not 31  
34 exp animals/ not humans/  
35 32 not 33  
36 limit 34 to yr="2014 -Current"

**Blank data extraction form: key study attributes and critical appraisal**

|                                                       |  |
|-------------------------------------------------------|--|
| <b>Subject of the study</b>                           |  |
| Health technology                                     |  |
| Disease                                               |  |
| Type of intervention                                  |  |
| Hypothesis and/or study question                      |  |
| <b>Key elements of the study</b>                      |  |
| Economic study type                                   |  |
| Study population                                      |  |
| Modelling and statistical extrapolation               |  |
| Setting                                               |  |
| Dates to which data relate                            |  |
| Link between effectiveness and cost data              |  |
| <b>Clinical evidence</b>                              |  |
| Clinical and epidemiological data                     |  |
| Parameter value                                       |  |
| Data sources                                          |  |
| Methods to obtain data                                |  |
| <b>Economic analysis</b>                              |  |
| Summary measure of health benefit reported            |  |
| Type of measure of health benefit                     |  |
| Utility or WTP benefit measures - method of valuation |  |
| Discount rate for utility or WTP                      |  |
| <b>Economic analysis</b>                              |  |
| Whose direct cost                                     |  |
| Which direct costs                                    |  |
| Source of resource use                                |  |
| How prices estimated                                  |  |
| Costs discounted                                      |  |

|    |                                                     |  |
|----|-----------------------------------------------------|--|
| 1  | Date of price data                                  |  |
| 2  |                                                     |  |
| 3  | Marginal or average costs                           |  |
| 4  |                                                     |  |
| 5  | Resource use separately reported                    |  |
| 6  |                                                     |  |
| 7  | Costs adjusted for inflation and how                |  |
| 8  |                                                     |  |
| 9  | Costs excluded                                      |  |
| 10 |                                                     |  |
| 11 | Adjustments to costs                                |  |
| 12 |                                                     |  |
| 13 | Budget impact (yes or no)                           |  |
| 14 |                                                     |  |
| 15 | Currency                                            |  |
| 16 |                                                     |  |
| 17 | <b>Economic analysis</b>                            |  |
| 18 |                                                     |  |
| 19 | Why include/exclude productivity costs              |  |
| 20 |                                                     |  |
| 21 | Source of cost and quantity data                    |  |
| 22 |                                                     |  |
| 23 | Were costs and quantities separately reported       |  |
| 24 |                                                     |  |
| 25 | When resources measured                             |  |
| 26 |                                                     |  |
| 27 | Discounted? Why? Relevant?                          |  |
| 28 |                                                     |  |
| 29 | <b>Statistical analysis cost</b>                    |  |
| 30 |                                                     |  |
| 31 | Point estimates used (yes or no)                    |  |
| 32 |                                                     |  |
| 33 | Descriptive statistics used                         |  |
| 34 |                                                     |  |
| 35 | Statistical tests used                              |  |
| 36 |                                                     |  |
| 37 | Parameters tested                                   |  |
| 38 |                                                     |  |
| 39 | Study powered to detect differences?                |  |
| 40 |                                                     |  |
| 41 | <b>Analysis uncertainty</b>                         |  |
| 42 |                                                     |  |
| 43 | Parameter uncertainty investigated (yes or no)      |  |
| 44 |                                                     |  |
| 45 | How parameter uncertainty investigated              |  |
| 46 |                                                     |  |
| 47 | Uncertainty investigated all parameters (yes or no) |  |
| 48 |                                                     |  |
| 49 | If not all parameters, which investigated           |  |
| 50 |                                                     |  |
| 51 | Methods or rationale for deterministic analysis     |  |
| 52 |                                                     |  |
| 53 | Probabilistic analysis were distributions defined   |  |
| 54 |                                                     |  |
| 55 | Was structural uncertainty assessed                 |  |
| 56 |                                                     |  |
| 57 | Was variability in data investigated                |  |
| 58 |                                                     |  |
| 59 |                                                     |  |
| 60 |                                                     |  |

1  
2  
3  
4  
5  
6  
7  
8  
9  
10  
11  
12  
13  
14  
15  
16  
17  
18  
19  
20  
21  
22  
23  
24  
25  
26  
27  
28  
29  
30  
31  
32  
33  
34  
35  
36  
37  
38  
39  
40  
41  
42  
43  
44  
45  
46  
47  
48  
49  
50  
51  
52  
53  
54  
55  
56  
57  
58  
59  
60

|                                                                 |  |
|-----------------------------------------------------------------|--|
| <b>Estimated benefits</b>                                       |  |
| Total benefits for each intervention                            |  |
| Duration of benefits                                            |  |
| Were side effects/adverse events included                       |  |
| Net (incremental benefit) of intervention-comparator            |  |
| Statistical test of differences in benefit                      |  |
| Sensitivity analysis of benefits only                           |  |
| <b>Cost results</b>                                             |  |
| Net (incremental) cost) of intervention-comparator              |  |
| Statistical test of differences in cost                         |  |
| Sensitivity analysis of costs only                              |  |
| Results of any currency conversion                              |  |
| <b>Synthesis</b>                                                |  |
| Was synthesis reported (yes or no)                              |  |
| If no, was rationale for no synthesis reported                  |  |
| ICER                                                            |  |
| Net benefit                                                     |  |
| Probability cost effective                                      |  |
| Cost acceptability curve (yes or no)                            |  |
| Sub-group analysis or sensitivity analysis (yes or no)          |  |
| Type of sub group or parameters varied in sensitivity analysis  |  |
| ICER                                                            |  |
| Net benefit                                                     |  |
| Probability cost effective                                      |  |
| Cost acceptability curve (yes or no)                            |  |
| <b>Authors conclusions</b>                                      |  |
| Conclusions                                                     |  |
| Choice of comparators                                           |  |
| Was the choice of intervention explicitly justified (yes or no) |  |

|    |                                                                 |  |
|----|-----------------------------------------------------------------|--|
| 1  |                                                                 |  |
| 2  |                                                                 |  |
| 3  |                                                                 |  |
| 4  | Was the choice of intervention implicitly justified (yes or no) |  |
| 5  | Key reasons for choice of intervention                          |  |
| 6  |                                                                 |  |
| 7  | Was the choice of comparator explicitly justified (yes or no)   |  |
| 8  |                                                                 |  |
| 9  | Does the choice of intervention or comparator affect the        |  |
| 10 |                                                                 |  |
| 11 | <b>Modelling</b>                                                |  |
| 12 |                                                                 |  |
| 13 | Model structure/technique clearly reported                      |  |
| 14 |                                                                 |  |
| 15 | Input data clearly reported                                     |  |
| 16 |                                                                 |  |
| 17 | Input data sources clearly reported                             |  |
| 18 |                                                                 |  |
| 19 | Uncertainty investigated (yes or no)                            |  |
| 20 |                                                                 |  |
| 21 | Methods used to assess uncertainty                              |  |
| 22 |                                                                 |  |
| 23 | Results of uncertainty assessments clear (yes or no)            |  |
| 24 |                                                                 |  |
| 25 | Other positive or negative comments on model                    |  |
| 26 |                                                                 |  |
| 27 | Assessment of validity of model - robust? - biased?             |  |
| 28 |                                                                 |  |
| 29 | <b>Validity effectiveness</b>                                   |  |
| 30 |                                                                 |  |
| 31 | Sources of data for model parameters                            |  |
| 32 |                                                                 |  |
| 33 | Were data combined to estimate parameters (yes or no)           |  |
| 34 |                                                                 |  |
| 35 | If yes, were methods clearly reported (yes or no)               |  |
| 36 |                                                                 |  |
| 37 | If yes, what methods used to combine data                       |  |
| 38 |                                                                 |  |
| 39 | How were data identified for inclusion                          |  |
| 40 |                                                                 |  |
| 41 | What inclusion criteria                                         |  |
| 42 |                                                                 |  |
| 43 | Justification for choice of data (yes or no)                    |  |
| 44 |                                                                 |  |
| 45 | If yes, what was justification                                  |  |
| 46 |                                                                 |  |
| 47 | What was quality of evidence used to derive parameter estimates |  |
| 48 |                                                                 |  |
| 49 | <b>Validity of health benefit</b>                               |  |
| 50 |                                                                 |  |
| 51 | Summary measure of benefit (yes or no)                          |  |
| 52 |                                                                 |  |
| 53 | If yes, how derived                                             |  |
| 54 |                                                                 |  |
| 55 | How were utility values measured or identified                  |  |
| 56 |                                                                 |  |
| 57 | To what extent does the measure of benefit cover all relevant   |  |
| 58 |                                                                 |  |
| 59 | <b>Overview of costs</b>                                        |  |
| 60 |                                                                 |  |

|    |                                                                    |  |
|----|--------------------------------------------------------------------|--|
| 1  |                                                                    |  |
| 2  |                                                                    |  |
| 3  |                                                                    |  |
| 4  | Were all relevant costs included for perspective (yes or no)       |  |
| 5  | If no, what omitted                                                |  |
| 6  |                                                                    |  |
| 7  | For each cost category, were all relevant cost items included (yes |  |
| 8  |                                                                    |  |
| 9  | If no, what omitted                                                |  |
| 10 |                                                                    |  |
| 11 | Do any omissions affect results or authors conclusions (yes or no) |  |
| 12 |                                                                    |  |
| 13 | <b>Cost details</b>                                                |  |
| 14 |                                                                    |  |
| 15 | Sources of resource use, price and cost data                       |  |
| 16 |                                                                    |  |
| 17 | Price adjustments (yes or no)                                      |  |
| 18 |                                                                    |  |
| 19 | If yes, what price adjustments                                     |  |
| 20 |                                                                    |  |
| 21 | Costs discounted (yes or no)                                       |  |
| 22 |                                                                    |  |
| 23 | If no, appropriate                                                 |  |
| 24 |                                                                    |  |
| 25 | Were any resource use, price or cost data stochastic (yes or no)   |  |
| 26 |                                                                    |  |
| 27 | If yes, any statistical analysis                                   |  |
| 28 |                                                                    |  |
| 29 | Cost data adequately reported yes/no                               |  |
| 30 |                                                                    |  |
| 31 | If no, why                                                         |  |
| 32 |                                                                    |  |
| 33 | Other cost issues                                                  |  |
| 34 |                                                                    |  |
| 35 | Costs valid (unbiased) (yes or no)                                 |  |
| 36 |                                                                    |  |
| 37 | If no, why                                                         |  |
| 38 |                                                                    |  |
| 39 | Costs generalisable (yes or no)                                    |  |
| 40 |                                                                    |  |
| 41 | If no, why                                                         |  |
| 42 |                                                                    |  |
| 43 | <b>Other issues</b>                                                |  |
| 44 |                                                                    |  |
| 45 | Comparisons with other studies (yes or no)                         |  |
| 46 |                                                                    |  |
| 47 | If yes, results of comparison                                      |  |
| 48 |                                                                    |  |
| 49 | Generalisability addressed (yes or no)                             |  |
| 50 |                                                                    |  |
| 51 | If yes, how                                                        |  |
| 52 |                                                                    |  |
| 53 | Selective reporting of results (yes or no)                         |  |
| 54 |                                                                    |  |
| 55 | If yes, in what ways                                               |  |
| 56 |                                                                    |  |
| 57 | Conclusions reflect scope/data                                     |  |
| 58 |                                                                    |  |
| 59 | Authors report the limitations (yes or no)                         |  |
| 60 |                                                                    |  |

|    |                                                                                            |  |
|----|--------------------------------------------------------------------------------------------|--|
| 1  |                                                                                            |  |
| 2  |                                                                                            |  |
| 3  |                                                                                            |  |
| 4  | If yes, what                                                                               |  |
| 5  |                                                                                            |  |
| 6  | Any other shortcomings yes/no                                                              |  |
| 7  |                                                                                            |  |
| 8  | If yes, what                                                                               |  |
| 9  |                                                                                            |  |
| 10 | <b>Implications</b>                                                                        |  |
| 11 | Authors recommendations                                                                    |  |
| 12 |                                                                                            |  |
| 13 | Recommendations suggested by abstractor                                                    |  |
| 14 |                                                                                            |  |
| 15 | Implications reported by authors                                                           |  |
| 16 |                                                                                            |  |
| 17 | Implications suggested by abstractor                                                       |  |
| 18 |                                                                                            |  |
| 19 | <b>Related publications</b>                                                                |  |
| 20 |                                                                                            |  |
| 21 | Related publications                                                                       |  |
| 22 |                                                                                            |  |
| 23 | Important to review for model                                                              |  |
| 24 |                                                                                            |  |
| 25 | Important to review for systematic review paper                                            |  |
| 26 |                                                                                            |  |
| 27 | <b>Focus on key model attributes</b>                                                       |  |
| 28 |                                                                                            |  |
| 29 | Static or dynamic                                                                          |  |
| 30 |                                                                                            |  |
| 31 | Stochastic or deterministic                                                                |  |
| 32 |                                                                                            |  |
| 33 | Aggregate or individual                                                                    |  |
| 34 |                                                                                            |  |
| 35 | Discrete or continuous                                                                     |  |
| 36 |                                                                                            |  |
| 37 | <b>Key:</b> ICER, incremental cost-effectiveness ratio; WTP, willingness to pay threshold. |  |
| 38 |                                                                                            |  |

Adapted from: [22,23]

**Table summary of critical appraisal**

| <b>Study</b>                                                                | <b>Studies reporting clearly</b> |
|-----------------------------------------------------------------------------|----------------------------------|
| Research question                                                           | 100% [26–33]                     |
| Study design                                                                | 25% [29,30]                      |
| Perspective                                                                 | 87.5% [26–28,30–33]              |
| Intervention                                                                | 100% [26–33]                     |
| Comparators                                                                 | 100% [26–33]                     |
| Study population                                                            | 100% [26–33]                     |
| Method of economic evaluation                                               | 87.5% [26–33]                    |
| <b>Data collection</b>                                                      |                                  |
| Source(s) of effectiveness estimates                                        | 87.5% [26,28,30–33]              |
| Methods of synthesis used to source effectiveness estimates (if applicable) | 37.5% [26,30,33]                 |
| Methods used to value health states and benefits                            | 87.5% [26,28–33]                 |
| Quantities of resource use and costs reported separately                    | 62.5% [26,28,29,31,33]           |
| Methods for resource use and unit costs                                     | 87.5% [26,28,29,31,33]           |
| Price year                                                                  | 62.5% [28–33]                    |
| Price adjustments for inflation or currency conversion                      | 12.5% [29]                       |
| <b>Analysis and interpretation of results</b>                               |                                  |
| Time horizon                                                                | 87.5% [26,28–33]                 |
| Discount rate (if applicable)                                               | 100% [28–33]                     |
| Explanation given if cost or benefits were not discounted (if applicable)   | 100% [26,27]                     |
| Statistical test(s) and confidence intervals given for stochastic           | 12.5% [26]                       |
| Sensitivity analysis methods                                                | 100% [26–33]                     |
| Choice of variables for sensitivity analysis                                | 87.5% [26,28–33]                 |
| Ranges used in sensitivity analysis                                         | 100% [26–33]                     |
| Appropriate comparisons                                                     | 100% [26–33]                     |
| Incremental analysis reported                                               | 100% [26–33]                     |
| Outcomes presented disaggregated and aggregated                             | 25% [28,33]                      |
| Study question answered                                                     | 100% [26–33]                     |
| Conclusions relevant to study                                               | 100% [26–33]                     |
| Limitations                                                                 | 62.5% [26,28–30,33]              |
| Generalisability issues                                                     | 25% [28,29]                      |



1  
2  
3  
4  
5  
6  
7  
8  
9  
10  
11  
12  
13  
14  
15  
16  
17  
18  
19  
20  
21  
22  
23  
24  
25  
26  
27  
28  
29  
30  
31  
32  
33  
34  
35  
36  
37  
38  
39  
40  
41  
42  
43  
44  
45  
46  
47  
48  
49  
50  
51  
52  
53  
54  
55  
56  
57  
58  
59  
60

|                              |                  |
|------------------------------|------------------|
| Comparisons to other studies | 37.5% [26,28,30] |
|------------------------------|------------------|

For peer review only

## Summary of sensitivity analysis

| Study               | Description                                                                                                                                                                                                                                      | Key results (€, 2014)                                                                                                                                                                                                                                                                                                                                                                                                                                                                                                                                                                              |
|---------------------|--------------------------------------------------------------------------------------------------------------------------------------------------------------------------------------------------------------------------------------------------|----------------------------------------------------------------------------------------------------------------------------------------------------------------------------------------------------------------------------------------------------------------------------------------------------------------------------------------------------------------------------------------------------------------------------------------------------------------------------------------------------------------------------------------------------------------------------------------------------|
| Allsup et al (2004) | <ul style="list-style-type: none"> <li>One-way sensitivity analyses conducted on: target coverage, hospitalisation risk, mortality risk, vaccine efficacy, incident rates, promotion costs, hospitalisation costs and life expectancy</li> </ul> | <ul style="list-style-type: none"> <li>Vaccination was judged to be not cost effective under any scenario when compared with no intervention.</li> <li>The most influential parameters were vaccine efficacy, influenza hospitalisation and the risk of complications.</li> <li>ICER ranged from €73,342 to €2,646,693 (life-year)</li> </ul>                                                                                                                                                                                                                                                      |
| Baio et al (2006)   | <ul style="list-style-type: none"> <li>The use of an object-oriented influence model Bayesian network model accounts for uncertainty implicitly.</li> </ul>                                                                                      | <ul style="list-style-type: none"> <li>Pairwise comparisons demonstrated that the adjuvanted vaccine was over 90% likely to be cost-effective versus standard vaccine at a willingness to pay threshold of €0. At the same threshold adjuvanted was over 75% cost-effective versus no vaccination and standard vaccine was over 80% cost-effective versus no vaccination.</li> </ul>                                                                                                                                                                                                               |
| Brydak et al (2012) | <ul style="list-style-type: none"> <li>One-way sensitivity analysis (all parameters except vaccine price)</li> <li>Probabilistic sensitivity analysis</li> </ul>                                                                                 | <ul style="list-style-type: none"> <li>One-way sensitivity analysis stated that all scenarios (for reimbursed vaccination versus no intervention) were cost effective (below a WTPT 3 GDP per capita).</li> <li>Probabilistic sensitivity analysis concluded that reimbursed vaccination was 79.93% likely to be cost effective (below the threshold of 3 GDP per capita).</li> <li>The most influential parameters were vaccine efficacy against death, population utilities, outcome discount rate and the influenza attack rate.</li> <li>ICER ranged from €9,070 to €21,107 (QALY).</li> </ul> |
| Lugner et al (2012) | <ul style="list-style-type: none"> <li>One-way sensitivity analysis was conducted on vaccination cost, influenza transmissibility, coverage and pre-existing immunity</li> </ul>                                                                 | <ul style="list-style-type: none"> <li>The vast majority of tested scenarios had ICERs below €15,000 for vaccination versus no intervention. The least cost effective scenario occurred when there was high pre-existing immunity, low transmissibility, direct costs alone were considered and there was a higher vaccine cost.</li> <li>The most influential parameter was the pandemic scenario (which influences transmissibility/incidence). The other main influential parameters differed according to country.</li> </ul>                                                                  |

|                                                                                                                                      |                                                                                                                                                                                                                                                                |                                                                                                                                                                                                                                                                                                                                                                                                                                                                                                                                                                                      |
|--------------------------------------------------------------------------------------------------------------------------------------|----------------------------------------------------------------------------------------------------------------------------------------------------------------------------------------------------------------------------------------------------------------|--------------------------------------------------------------------------------------------------------------------------------------------------------------------------------------------------------------------------------------------------------------------------------------------------------------------------------------------------------------------------------------------------------------------------------------------------------------------------------------------------------------------------------------------------------------------------------------|
|                                                                                                                                      |                                                                                                                                                                                                                                                                | <ul style="list-style-type: none"> <li>• ICER ranged from dominated to €43,006.</li> </ul>                                                                                                                                                                                                                                                                                                                                                                                                                                                                                           |
| Meier et al (2015)                                                                                                                   | <ul style="list-style-type: none"> <li>• One-way sensitivity analysis was conducted on the discount rate, vaccine efficacy (degree of matching), influenza incidence and influenza complication rates</li> <li>• Probabilistic sensitivity analysis</li> </ul> | <ul style="list-style-type: none"> <li>• All scenarios indicated that vaccination would be cost-effective under a threshold of £30,000/QALY.</li> <li>• Probabilistic sensitivity analysis concluded that a total of 68% of the simulations were below a threshold of £20,000/QALY, and 87% were below a threshold of £30,000/QALY.</li> <li>• The most influential parameters were circulation of influenza A and the degree of matching between the trivalent vaccine and the circulating influenza B lineages.</li> <li>• ICER ranged from dominant to €25,483 (QALY).</li> </ul> |
| Piercy et al (2004)                                                                                                                  | <ul style="list-style-type: none"> <li>• One-way sensitivity analysis was conducted on the discount rate, life expectancy and the influenza incidence rate</li> </ul>                                                                                          | <ul style="list-style-type: none"> <li>• The adjuvanted vaccination was judged to be cost effective (versus standard vaccination) under all scenarios tested.</li> <li>• ICER ranged from dominated to €26,383 (life-year).</li> </ul>                                                                                                                                                                                                                                                                                                                                               |
| Postma et al (1999)                                                                                                                  | <ul style="list-style-type: none"> <li>• One-way sensitivity analysis was conducted on pneumonia related hospitalisation rates, mortality risk and hospitalisation bed days, vaccine efficacy and the discount rate</li> </ul>                                 | <ul style="list-style-type: none"> <li>• All tested scenarios resulted in cost effectiveness results (below €12,500 ICER per life-year gained).</li> <li>• The most influential parameters for the net cost were risk of complications (hospitalisation and mortality).</li> <li>• Broken down ICER results were not provided for sensitivity analysis.</li> </ul>                                                                                                                                                                                                                   |
| Scuffham and West (2002)                                                                                                             | <ul style="list-style-type: none"> <li>• One-way sensitivity analysis was conducted on vaccination effectiveness, side effects, vaccine price, years per life lost, discount rate, coverage and the attack rate</li> </ul>                                     | <ul style="list-style-type: none"> <li>• The majority of tested scenarios were cost saving when vaccination was compared to no intervention. With the exception of a vaccination price increase.</li> <li>• The most influential parameters were vaccine price, vaccine effectiveness and the discount rate for outcomes.</li> <li>• Broken down ICER results were not provided for sensitivity analysis (only net costs).</li> </ul>                                                                                                                                                |
| <p><b>Key:</b> ICER, incremental cost effectiveness ratio; QALY, quality-adjusted life-year; WTPT, willingness to pay threshold.</p> |                                                                                                                                                                                                                                                                |                                                                                                                                                                                                                                                                                                                                                                                                                                                                                                                                                                                      |

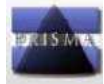

# PRISMA 2009 Checklist

1  
2  
3  
4  
5  
6  
7  
8  
9  
10  
11  
12  
13  
14  
15  
16  
17  
18  
19  
20  
21  
22  
23  
24  
25  
26  
27  
28  
29  
30  
31  
32  
33  
34  
35  
36  
37  
38  
39  
40  
41  
42  
43  
44  
45  
46  
47

| Section/topic                      | #  | Checklist item                                                                                                                                                                                                                                                                                              | Reported on page #           |
|------------------------------------|----|-------------------------------------------------------------------------------------------------------------------------------------------------------------------------------------------------------------------------------------------------------------------------------------------------------------|------------------------------|
| <b>TITLE</b>                       |    |                                                                                                                                                                                                                                                                                                             |                              |
| Title                              | 1  | Identify the report as a systematic review, meta-analysis, or both.                                                                                                                                                                                                                                         | 1                            |
| <b>ABSTRACT</b>                    |    |                                                                                                                                                                                                                                                                                                             |                              |
| Structured summary                 | 2  | Provide a structured summary including, as applicable: background; objectives; data sources; study eligibility criteria, participants, and interventions; study appraisal and synthesis methods; results; limitations; conclusions and implications of key findings; systematic review registration number. | 2                            |
| <b>INTRODUCTION</b>                |    |                                                                                                                                                                                                                                                                                                             |                              |
| Rationale                          | 3  | Describe the rationale for the review in the context of what is already known.                                                                                                                                                                                                                              | 3                            |
| Objectives                         | 4  | Provide an explicit statement of questions being addressed with reference to participants, interventions, comparisons, outcomes, and study design (PICOS).                                                                                                                                                  | 4                            |
| <b>METHODS</b>                     |    |                                                                                                                                                                                                                                                                                                             |                              |
| Protocol and registration          | 5  | Indicate if a review protocol exists, if and where it can be accessed (e.g., Web address), and, if available, provide registration information including registration number.                                                                                                                               | n/a                          |
| Eligibility criteria               | 6  | Specify study characteristics (e.g., PICOS, length of follow-up) and report characteristics (e.g., years considered, language, publication status) used as criteria for eligibility, giving rationale.                                                                                                      | 5                            |
| Information sources                | 7  | Describe all information sources (e.g., databases with dates of coverage, contact with study authors to identify additional studies) in the search and date last searched.                                                                                                                                  | 4/5                          |
| Search                             | 8  | Present full electronic search strategy for at least one database, including any limits used, such that it could be repeated.                                                                                                                                                                               | Supplementary material       |
| Study selection                    | 9  | State the process for selecting studies (i.e., screening, eligibility, included in systematic review, and, if applicable, included in the meta-analysis).                                                                                                                                                   | 5                            |
| Data collection process            | 10 | Describe method of data extraction from reports (e.g., piloted forms, independently, in duplicate) and any processes for obtaining and confirming data from investigators.                                                                                                                                  | 5                            |
| Data items                         | 11 | List and define all variables for which data were sought (e.g., PICOS, funding sources) and any assumptions and simplifications made.                                                                                                                                                                       | 5 and supplementary material |
| Risk of bias in individual studies | 12 | Describe methods used for assessing risk of bias of individual studies (including specification of whether this was done at the study or outcome level), and how this information is to be used in any data synthesis.                                                                                      | 5 and supplementary material |
| Summary measures                   | 13 | State the principal summary measures (e.g., risk ratio, difference in means).                                                                                                                                                                                                                               | n/a                          |

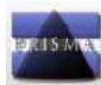

# PRISMA 2009 Checklist

|                      |    |                                                                                                                                                           |   |
|----------------------|----|-----------------------------------------------------------------------------------------------------------------------------------------------------------|---|
| Synthesis of results | 14 | Describe the methods of handling data and combining results of studies, if done, including measures of consistency (e.g., $I^2$ ) for each meta-analysis. | 6 |
|----------------------|----|-----------------------------------------------------------------------------------------------------------------------------------------------------------|---|

Page 1 of 2

| Section/topic                 | #  | Checklist item                                                                                                                                                                                           | Reported on page #               |
|-------------------------------|----|----------------------------------------------------------------------------------------------------------------------------------------------------------------------------------------------------------|----------------------------------|
| Risk of bias across studies   | 15 | Specify any assessment of risk of bias that may affect the cumulative evidence (e.g., publication bias, selective reporting within studies).                                                             | 17-19 and supplementary material |
| Additional analyses           | 16 | Describe methods of additional analyses (e.g., sensitivity or subgroup analyses, meta-regression), if done, indicating which were pre-specified.                                                         | n/a                              |
| <b>RESULTS</b>                |    |                                                                                                                                                                                                          |                                  |
| Study selection               | 17 | Give numbers of studies screened, assessed for eligibility, and included in the review, with reasons for exclusions at each stage, ideally with a flow diagram.                                          | 7                                |
| Study characteristics         | 18 | For each study, present characteristics for which data were extracted (e.g., study size, PICOS, follow-up period) and provide the citations.                                                             | 6-7                              |
| Risk of bias within studies   | 19 | Present data on risk of bias of each study and, if available, any outcome level assessment (see item 12).                                                                                                | 17-19 and supplementary material |
| Results of individual studies | 20 | For all outcomes considered (benefits or harms), present, for each study: (a) simple summary data for each intervention group (b) effect estimates and confidence intervals, ideally with a forest plot. | 12-14                            |
| Synthesis of results          | 21 | Present results of each meta-analysis done, including confidence intervals and measures of consistency.                                                                                                  | n/a                              |
| Risk of bias across studies   | 22 | Present results of any assessment of risk of bias across studies (see Item 15).                                                                                                                          | 17-19                            |
| Additional analysis           | 23 | Give results of additional analyses, if done (e.g., sensitivity or subgroup analyses, meta-regression [see Item 16]).                                                                                    | n/a                              |
| <b>DISCUSSION</b>             |    |                                                                                                                                                                                                          |                                  |
| Summary of evidence           | 24 | Summarize the main findings including the strength of evidence for each main outcome; consider their relevance to key groups (e.g., healthcare providers, users, and policy makers).                     | 15-17                            |
| Limitations                   | 25 | Discuss limitations at study and outcome level (e.g., risk of bias), and at review-level (e.g., incomplete retrieval of identified research, reporting bias).                                            | 21-22                            |
| Conclusions                   | 26 | Provide a general interpretation of the results in the context of other evidence, and implications for future research.                                                                                  | 21                               |
| <b>FUNDING</b>                |    |                                                                                                                                                                                                          |                                  |
| Funding                       | 27 | Describe sources of funding for the systematic review and other support (e.g., supply of data); role of funders for the systematic review.                                                               | 24                               |

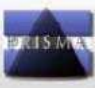

# PRISMA 2009 Checklist

1  
2  
3  
4  
5  
6  
7  
8  
9  
10  
11  
12  
13  
14  
15  
16  
17  
18  
19  
20  
21  
22  
23  
24  
25  
26  
27  
28  
29  
30  
31  
32  
33  
34  
35  
36  
37  
38  
39  
40  
41  
42  
43  
44  
45  
46  
47

*From:* Moher D, Liberati A, Tetzlaff J, Altman DG, The PRISMA Group (2009). Preferred Reporting Items for Systematic Reviews and Meta-Analyses: The PRISMA Statement. PLoS Med 6(6): e1000097. doi:10.1371/journal.pmed1000097

For more information, visit: [www.prisma-statement.org](http://www.prisma-statement.org).

Page 2 of 2

For peer review only
