# Supplementary material for: A systematic review of economic evaluations of seasonal influenza vaccination for the elderly population in the European Union
Source: PubMed Central journal article supplement — BMJ Open. 2017 Jun 10;7(6):e014847. doi: 10.1136/bmjopen-2016-014847 (PMC5623429; doi:10.1136/bmjopen-2016-014847), 2017-06-10
Supplement: bmjopen-2016-014847supp001.pdf [file bmjopen-2016-014847supp001.pdf]

## Supplementary material

### Example search strategy

- 1 Influenza, Human/
- 2 influenza/
- 3 flu/
- 4 influenza virus/
- 5 seasonal flu/
- 6 1 or 2 or 3 or 4 or 5
- 7 Vaccination/
- 8 vaccine/
- 9 7 or 8
- 10 Economics/
- 11 exp "costs and cost analysis"/
- 12 Economics, Dental/
- 13 exp economics, hospital/
- 14 Economics, Medical/
- 15 Economics, Nursing/
- 16 Economics, Pharmaceutical/
- 17 (economic\$ or cost or costs or costly or costing or price or prices or pricing or pharmaco-economic\$).ti,ab.
- 18 (expenditure\$ not energy).ti,ab.
- 19 value for money.ti,ab.
- 20 budget\$.ti,ab.
- 21 10 or 11 or 12 or 13 or 14 or 15 or 16 or 17 or 18 or 19 or 20
- 22 ((energy or oxygen) adj cost).ti,ab.
- 23 (metabolic adj cost).ti,ab.
- 24 ((energy or oxygen) adj expenditure).ti,ab.
- 25 22 or 23 or 24
- 26 6 and 9 and 21
- 27 26 not 25
- 28 letter.pt.
- 29 editorial.pt.
- 30 historical article.pt.
- 31 28 or 29 or 30
- 32 27 not 31
- 33 exp animals/ not humans/
- 34 32 not 33
- 35 limit 34 to yr="2014 -Current"

**Blank data extraction form: key study attributes and critical appraisal**

|                                                       |  |
|-------------------------------------------------------|--|
| <b>Subject of the study</b>                           |  |
| Health technology                                     |  |
| Disease                                               |  |
| Type of intervention                                  |  |
| Hypothesis and/or study question                      |  |
| <b>Key elements of the study</b>                      |  |
| Economic study type                                   |  |
| Study population                                      |  |
| Modelling and statistical extrapolation               |  |
| Setting                                               |  |
| Dates to which data relate                            |  |
| Link between effectiveness and cost data              |  |
| <b>Clinical evidence</b>                              |  |
| Clinical and epidemiological data                     |  |
| Parameter value                                       |  |
| Data sources                                          |  |
| Methods to obtain data                                |  |
| <b>Economic analysis</b>                              |  |
| Summary measure of health benefit reported            |  |
| Type of measure of health benefit                     |  |
| Utility or WTP benefit measures - method of valuation |  |
| Discount rate for utility or WTP                      |  |
| <b>Economic analysis</b>                              |  |
| Whose direct cost                                     |  |
| Which direct costs                                    |  |
| Source of resource use                                |  |
| How prices estimated                                  |  |
| Costs discounted                                      |  |

|                                                     |  |
|-----------------------------------------------------|--|
| Date of price data                                  |  |
| Marginal or average costs                           |  |
| Resource use separately reported                    |  |
| Costs adjusted for inflation and how                |  |
| Costs excluded                                      |  |
| Adjustments to costs                                |  |
| Budget impact (yes or no)                           |  |
| Currency                                            |  |
| <b>Economic analysis</b>                            |  |
| Why include/exclude productivity costs              |  |
| Source of cost and quantity data                    |  |
| Were costs and quantities separately reported       |  |
| When resources measured                             |  |
| Discounted? Why? Relevant?                          |  |
| <b>Statistical analysis cost</b>                    |  |
| Point estimates used (yes or no)                    |  |
| Descriptive statistics used                         |  |
| Statistical tests used                              |  |
| Parameters tested                                   |  |
| Study powered to detect differences?                |  |
| <b>Analysis uncertainty</b>                         |  |
| Parameter uncertainty investigated (yes or no)      |  |
| How parameter uncertainty investigated              |  |
| Uncertainty investigated all parameters (yes or no) |  |
| If not all parameters, which investigated           |  |
| Methods or rationale for deterministic analysis     |  |
| Probabilistic analysis were distributions defined   |  |
| Was structural uncertainty assessed                 |  |
| Was variability in data investigated                |  |

|                                                                 |  |
|-----------------------------------------------------------------|--|
| <b>Estimated benefits</b>                                       |  |
| Total benefits for each intervention                            |  |
| Duration of benefits                                            |  |
| Were side effects/adverse events included                       |  |
| Net (incremental benefit) of intervention-comparator            |  |
| Statistical test of differences in benefit                      |  |
| Sensitivity analysis of benefits only                           |  |
| <b>Cost results</b>                                             |  |
| Net (incremental) cost) of intervention-comparator              |  |
| Statistical test of differences in cost                         |  |
| Sensitivity analysis of costs only                              |  |
| Results of any currency conversion                              |  |
| <b>Synthesis</b>                                                |  |
| Was synthesis reported (yes or no)                              |  |
| If no, was rationale for no synthesis reported                  |  |
| ICER                                                            |  |
| Net benefit                                                     |  |
| Probability cost effective                                      |  |
| Cost acceptability curve (yes or no)                            |  |
| Sub-group analysis or sensitivity analysis (yes or no)          |  |
| Type of sub group or parameters varied in sensitivity analysis  |  |
| ICER                                                            |  |
| Net benefit                                                     |  |
| Probability cost effective                                      |  |
| Cost acceptability curve (yes or no)                            |  |
| <b>Authors conclusions</b>                                      |  |
| Conclusions                                                     |  |
| Choice of comparators                                           |  |
| Was the choice of intervention explicitly justified (yes or no) |  |

|                                                                 |  |
|-----------------------------------------------------------------|--|
| Was the choice of intervention implicitly justified (yes or no) |  |
| Key reasons for choice of intervention                          |  |
| Was the choice of comparator explicitly justified (yes or no)   |  |
| Does the choice of intervention or comparator affect the        |  |
| <b>Modelling</b>                                                |  |
| Model structure/technique clearly reported                      |  |
| Input data clearly reported                                     |  |
| Input data sources clearly reported                             |  |
| Uncertainty investigated (yes or no)                            |  |
| Methods used to assess uncertainty                              |  |
| Results of uncertainty assessments clear (yes or no)            |  |
| Other positive or negative comments on model                    |  |
| Assessment of validity of model - robust? - biased?             |  |
| <b>Validity effectiveness</b>                                   |  |
| Sources of data for model parameters                            |  |
| Were data combined to estimate parameters (yes or no)           |  |
| If yes, were methods clearly reported (yes or no)               |  |
| If yes, what methods used to combine data                       |  |
| How were data identified for inclusion                          |  |
| What inclusion criteria                                         |  |
| Justification for choice of data (yes or no)                    |  |
| If yes, what was justification                                  |  |
| What was quality of evidence used to derive parameter estimates |  |
| <b>Validity of health benefit</b>                               |  |
| Summary measure of benefit (yes or no)                          |  |
| If yes, how derived                                             |  |
| How were utility values measured or identified                  |  |
| To what extent does the measure of benefit cover all relevant   |  |
| <b>Overview of costs</b>                                        |  |

|                                                                    |  |
|--------------------------------------------------------------------|--|
| Were all relevant costs included for perspective (yes or no)       |  |
| If no, what omitted                                                |  |
| For each cost category, were all relevant cost items included (yes |  |
| If no, what omitted                                                |  |
| Do any omissions affect results or authors conclusions (yes or no) |  |
| <b>Cost details</b>                                                |  |
| Sources of resource use, price and cost data                       |  |
| Price adjustments (yes or no)                                      |  |
| If yes, what price adjustments                                     |  |
| Costs discounted (yes or no)                                       |  |
| If no, appropriate                                                 |  |
| Were any resource use, price or cost data stochastic (yes or no)   |  |
| If yes, any statistical analysis                                   |  |
| Cost data adequately reported yes/no                               |  |
| If no, why                                                         |  |
| Other cost issues                                                  |  |
| Costs valid (unbiased) (yes or no)                                 |  |
| If no, why                                                         |  |
| Costs generalisable (yes or no)                                    |  |
| If no, why                                                         |  |
| <b>Other issues</b>                                                |  |
| Comparisons with other studies (yes or no)                         |  |
| If yes, results of comparison                                      |  |
| Generalisability addressed (yes or no)                             |  |
| If yes, how                                                        |  |
| Selective reporting of results (yes or no)                         |  |
| If yes, in what ways                                               |  |
| Conclusions reflect scope/data                                     |  |
| Authors report the limitations (yes or no)                         |  |

|                                                                                            |  |
|--------------------------------------------------------------------------------------------|--|
| If yes, what                                                                               |  |
| Any other shortcomings yes/no                                                              |  |
| If yes, what                                                                               |  |
| <b>Implications</b>                                                                        |  |
| Authors recommendations                                                                    |  |
| Recommendations suggested by abstractor                                                    |  |
| Implications reported by authors                                                           |  |
| Implications suggested by abstractor                                                       |  |
| <b>Related publications</b>                                                                |  |
| Related publications                                                                       |  |
| Important to review for model                                                              |  |
| Important to review for systematic review paper                                            |  |
| <b>Focus on key model attributes</b>                                                       |  |
| Static or dynamic                                                                          |  |
| Stochastic or deterministic                                                                |  |
| Aggregate or individual                                                                    |  |
| Discrete or continuous                                                                     |  |
| <b>Key:</b> ICER, incremental cost-effectiveness ratio; WTP, willingness to pay threshold. |  |

Adapted from: [22,23]

**Table summary of critical appraisal**

| <b>Study</b>                                                                | <b>Studies reporting clearly</b> |
|-----------------------------------------------------------------------------|----------------------------------|
| Research question                                                           | 100% [26–33]                     |
| Study design                                                                | 25% [29,30]                      |
| Perspective                                                                 | 87.5% [26–28,30–33]              |
| Intervention                                                                | 100% [26–33]                     |
| Comparators                                                                 | 100% [26–33]                     |
| Study population                                                            | 100% [26–33]                     |
| Method of economic evaluation                                               | 87.5% [26–33]                    |
| <b>Data collection</b>                                                      |                                  |
| Source(s) of effectiveness estimates                                        | 87.5% [26,28,30–33]              |
| Methods of synthesis used to source effectiveness estimates (if applicable) | 37.5% [26,30,33]                 |
| Methods used to value health states and benefits                            | 87.5% [26,28–33]                 |
| Quantities of resource use and costs reported separately                    | 62.5% [26,28,29,31,33]           |
| Methods for resource use and unit costs                                     | 87.5% [26,28,29,31,33]           |
| Price year                                                                  | 62.5% [28–33]                    |
| Price adjustments for inflation or currency conversion                      | 12.5% [29]                       |
| <b>Analysis and interpretation of results</b>                               |                                  |
| Time horizon                                                                | 87.5% [26,28–33]                 |
| Discount rate (if applicable)                                               | 100% [28–33]                     |
| Explanation given if cost or benefits were not discounted (if applicable)   | 100% [26,27]                     |
| Statistical test(s) and confidence intervals given for stochastic           | 12.5% [26]                       |
| Sensitivity analysis methods                                                | 100% [26–33]                     |
| Choice of variables for sensitivity analysis                                | 87.5% [26,28–33]                 |
| Ranges used in sensitivity analysis                                         | 100% [26–33]                     |
| Appropriate comparisons                                                     | 100% [26–33]                     |
| Incremental analysis reported                                               | 100% [26–33]                     |
| Outcomes presented disaggregated and aggregated                             | 25% [28,33]                      |
| Study question answered                                                     | 100% [26–33]                     |
| Conclusions relevant to study                                               | 100% [26–33]                     |
| Limitations                                                                 | 62.5% [26,28–30,33]              |
| Generalisability issues                                                     | 25% [28,29]                      |



|                              |                  |
|------------------------------|------------------|
| Comparisons to other studies | 37.5% [26,28,30] |
|------------------------------|------------------|

## Summary of sensitivity analysis

| Study               | Description                                                                                                                                                                                                                                      | Key results (€, 2014)                                                                                                                                                                                                                                                                                                                                                                                                                                                                                                                                                                              |
|---------------------|--------------------------------------------------------------------------------------------------------------------------------------------------------------------------------------------------------------------------------------------------|----------------------------------------------------------------------------------------------------------------------------------------------------------------------------------------------------------------------------------------------------------------------------------------------------------------------------------------------------------------------------------------------------------------------------------------------------------------------------------------------------------------------------------------------------------------------------------------------------|
| Allsup et al (2004) | <ul style="list-style-type: none"> <li>One-way sensitivity analyses conducted on: target coverage, hospitalisation risk, mortality risk, vaccine efficacy, incident rates, promotion costs, hospitalisation costs and life expectancy</li> </ul> | <ul style="list-style-type: none"> <li>Vaccination was judged to be not cost effective under any scenario when compared with no intervention.</li> <li>The most influential parameters were vaccine efficacy, influenza hospitalisation and the risk of complications.</li> <li>ICER ranged from €73,342 to €2,646,693 (life-year)</li> </ul>                                                                                                                                                                                                                                                      |
| Baio et al (2006)   | <ul style="list-style-type: none"> <li>The use of an object-oriented influence model Bayesian network model accounts for uncertainty implicitly.</li> </ul>                                                                                      | <ul style="list-style-type: none"> <li>Pairwise comparisons demonstrated that the adjuvanted vaccine was over 90% likely to be cost-effective versus standard vaccine at a willingness to pay threshold of €0. At the same threshold adjuvanted was over 75% cost-effective versus no vaccination and standard vaccine was over 80% cost-effective versus no vaccination.</li> </ul>                                                                                                                                                                                                               |
| Brydak et al (2012) | <ul style="list-style-type: none"> <li>One-way sensitivity analysis (all parameters except vaccine price)</li> <li>Probabilistic sensitivity analysis</li> </ul>                                                                                 | <ul style="list-style-type: none"> <li>One-way sensitivity analysis stated that all scenarios (for reimbursed vaccination versus no intervention) were cost effective (below a WTPT 3 GDP per capita).</li> <li>Probabilistic sensitivity analysis concluded that reimbursed vaccination was 79.93% likely to be cost effective (below the threshold of 3 GDP per capita).</li> <li>The most influential parameters were vaccine efficacy against death, population utilities, outcome discount rate and the influenza attack rate.</li> <li>ICER ranged from €9,070 to €21,107 (QALY).</li> </ul> |
| Lugner et al (2012) | <ul style="list-style-type: none"> <li>One-way sensitivity analysis was conducted on vaccination cost, influenza transmissibility, coverage and pre-existing immunity</li> </ul>                                                                 | <ul style="list-style-type: none"> <li>The vast majority of tested scenarios had ICERs below €15,000 for vaccination versus no intervention. The least cost effective scenario occurred when there was high pre-existing immunity, low transmissibility, direct costs alone were considered and there was a higher vaccine cost.</li> <li>The most influential parameter was the pandemic scenario (which influences transmissibility/incidence). The other main influential parameters differed according to country.</li> </ul>                                                                  |

|                                                                                                                                      |                                                                                                                                                                                                                                                                |                                                                                                                                                                                                                                                                                                                                                                                                                                                                                                                                                                                      |
|--------------------------------------------------------------------------------------------------------------------------------------|----------------------------------------------------------------------------------------------------------------------------------------------------------------------------------------------------------------------------------------------------------------|--------------------------------------------------------------------------------------------------------------------------------------------------------------------------------------------------------------------------------------------------------------------------------------------------------------------------------------------------------------------------------------------------------------------------------------------------------------------------------------------------------------------------------------------------------------------------------------|
|                                                                                                                                      |                                                                                                                                                                                                                                                                | <ul style="list-style-type: none"> <li>• ICER ranged from dominated to €43,006.</li> </ul>                                                                                                                                                                                                                                                                                                                                                                                                                                                                                           |
| Meier et al (2015)                                                                                                                   | <ul style="list-style-type: none"> <li>• One-way sensitivity analysis was conducted on the discount rate, vaccine efficacy (degree of matching), influenza incidence and influenza complication rates</li> <li>• Probabilistic sensitivity analysis</li> </ul> | <ul style="list-style-type: none"> <li>• All scenarios indicated that vaccination would be cost-effective under a threshold of £30,000/QALY.</li> <li>• Probabilistic sensitivity analysis concluded that a total of 68% of the simulations were below a threshold of £20,000/QALY, and 87% were below a threshold of £30,000/QALY.</li> <li>• The most influential parameters were circulation of influenza A and the degree of matching between the trivalent vaccine and the circulating influenza B lineages.</li> <li>• ICER ranged from dominant to €25,483 (QALY).</li> </ul> |
| Piercy et al (2004)                                                                                                                  | <ul style="list-style-type: none"> <li>• One-way sensitivity analysis was conducted on the discount rate, life expectancy and the influenza incidence rate</li> </ul>                                                                                          | <ul style="list-style-type: none"> <li>• The adjuvanted vaccination was judged to be cost effective (versus standard vaccination) under all scenarios tested.</li> <li>• ICER ranged from dominated to €26,383 (life-year).</li> </ul>                                                                                                                                                                                                                                                                                                                                               |
| Postma et al (1999)                                                                                                                  | <ul style="list-style-type: none"> <li>• One-way sensitivity analysis was conducted on pneumonia related hospitalisation rates, mortality risk and hospitalisation bed days, vaccine efficacy and the discount rate</li> </ul>                                 | <ul style="list-style-type: none"> <li>• All tested scenarios resulted in cost effectiveness results (below €12,500 ICER per life-year gained).</li> <li>• The most influential parameters for the net cost were risk of complications (hospitalisation and mortality).</li> <li>• Broken down ICER results were not provided for sensitivity analysis.</li> </ul>                                                                                                                                                                                                                   |
| Scuffham and West (2002)                                                                                                             | <ul style="list-style-type: none"> <li>• One-way sensitivity analysis was conducted on vaccination effectiveness, side effects, vaccine price, years per life lost, discount rate, coverage and the attack rate</li> </ul>                                     | <ul style="list-style-type: none"> <li>• The majority of tested scenarios were cost saving when vaccination was compared to no intervention. With the exception of a vaccination price increase.</li> <li>• The most influential parameters were vaccine price, vaccine effectiveness and the discount rate for outcomes.</li> <li>• Broken down ICER results were not provided for sensitivity analysis (only net costs).</li> </ul>                                                                                                                                                |
| <p><b>Key:</b> ICER, incremental cost effectiveness ratio; QALY, quality-adjusted life-year; WTPT, willingness to pay threshold.</p> |                                                                                                                                                                                                                                                                |                                                                                                                                                                                                                                                                                                                                                                                                                                                                                                                                                                                      |
